# Supplementary material for: Dysoticans F–H: three unprecedented dimeric cadinanes from Dysoxylum parasiticum (Osbeck) Kosterm. stem bark
Source: Royal Society of Chemistry journal article supplement (doi:10.1039/d3ra01085f), 2023-01-01
Supplement: d3ra01085f1.pdf [file d3ra01085f1.pdf]

## Supporting Information

### **Dysoticans F-H: three unprecedented dimeric cadinanes from *Dysoxylum parasiticum* (Osbeck) Kosterm. stem bark**

Al Arofatus Naini<sup>a,b</sup>, Tri Mayanti<sup>a,c</sup>, Rani Maharani<sup>a,c</sup>, Sofa Fajriah<sup>d</sup>, Kazuya Kabayama<sup>e</sup>, Atsushi Shimoyama<sup>e</sup>, Yoshiyuki Manabe<sup>e</sup>, Koichi Fukase<sup>e</sup>, Sirriporn Jungsuttiwong<sup>f</sup>, Unang Supratman<sup>a,c\*</sup>

<sup>a</sup>Department of Chemistry, Faculty of Mathematics and Natural Sciences, Universitas Padjadjaran, Jatinangor 45363, Sumedang, West Java, Indonesia

<sup>b</sup>Central Laboratory, Universitas Padjadjaran, Jatinangor 45363, Sumedang, West Java Indonesia

<sup>c</sup>Study Centre of Natural Product Chemistry and Synthesis, Faculty of Mathematics and Natural Sciences, Universitas Padjadjaran, Jatinangor 45363, Sumedang, West Java, Indonesia

<sup>d</sup>Research Center for Chemistry, National Research and Innovation Agency (BRIN), Kawasan PUSPIPTEK Serpong Tangerang, Selatan, 15314, Indonesia

<sup>e</sup>Department of Chemistry, Graduate School of Science, Osaka University, 1-1 Machikaneyama-cho, Toyonaka, Osaka, 560-0043, Japan

<sup>f</sup>Department of Chemistry, Faculty of Science, Ubon Ratchathani University, Ubon Ratchathani, 34190, Thailand

\*Corresponding author.

E-mail: unang.supratman@unpad.ac.id (Unang Supratman)

|                                                                         |    |
|-------------------------------------------------------------------------|----|
| Figure S1. Mass Spectrum of <b>1</b> .....                              | 3  |
| Figure S2. UV spectrum of <b>1</b> .....                                | 4  |
| Figure S3. IR spectrum of <b>1</b> .....                                | 4  |
| Figure S4. <sup>1</sup> H NMR of <b>1</b> .....                         | 5  |
| Figure S5. <sup>13</sup> C-DEPT NMR of <b>1</b> .....                   | 6  |
| Figure S6. HMQC spectrum of <b>1</b> .....                              | 7  |
| Figure S7. HMBC of <b>1</b> (A Unit) .....                              | 8  |
| Figure S8. HMBC of <b>1</b> (B Unit).....                               | 10 |
| Figure S9. HMBC of <b>1</b> (A and B units) .....                       | 11 |
| Figure S10. <sup>1</sup> H- <sup>1</sup> H COSY of <b>1</b> .....       | 12 |
| Figure S11. <sup>1</sup> H- <sup>1</sup> H NOESY of <b>1</b> .....      | 13 |
| Figure S12. Mass spectrum of <b>2</b> .....                             | 13 |
| Figure S13. UV spectrum of <b>2</b> .....                               | 14 |
| Figure S14. IR spectrum of <b>2</b> .....                               | 14 |
| Figure S15. <sup>1</sup> H NMR of <b>2</b> .....                        | 15 |
| Figure S16. <sup>13</sup> C-DEPT NMR of <b>2</b> .....                  | 15 |
| Figure S17. HMQC spectrum of <b>2</b> .....                             | 16 |
| Figure S18. HMBC spectrum of <b>2</b> .....                             | 16 |
| Figure S19. <sup>1</sup> H- <sup>1</sup> H COSY of <b>2</b> .....       | 17 |
| Figure S20. <sup>1</sup> H- <sup>1</sup> H NOESY of <b>2</b> .....      | 17 |
| Figure S21. Mass spectrum of <b>3</b> .....                             | 18 |
| Figure S22. UV spectrum of <b>3</b> .....                               | 18 |
| Figure S23. IR spectrum of <b>3</b> .....                               | 19 |
| Figure S24. <sup>1</sup> H NMR of <b>3</b> .....                        | 19 |
| Figure S25. <sup>13</sup> C-DEPT NMR of <b>3</b> .....                  | 20 |
| Figure S26. HMQC spectrum of <b>3</b> .....                             | 20 |
| Figure S27. HMBC spectrum of <b>3</b> .....                             | 21 |
| Figure S28. <sup>1</sup> H- <sup>1</sup> H COSY of <b>3</b> .....       | 21 |
| Figure S29. <sup>1</sup> H- <sup>1</sup> H NOESY of <b>3</b> .....      | 22 |
| Figure S30. Chemical structure of known compounds ( <b>4-6</b> ). ..... | 36 |

**Computational section**..... 23

- For compound 1..... 23
  - Table S1. Gibbs free energies and equilibrium populations of low-energy conformer of **1** .....23
  - Table S2. Cartesian coordinates for the low-energy reoptimized of compound **1** in the gas phase (Å) at B3LYP/6-31G (d,p) level. .... 23
- For compound 2..... 27
  - Table S3. Gibbs free energies and equilibrium populations of low-energy conformer of **2** .....27
  - Table S4. Cartesian coordinates for the low-energy reoptimized of compound **2** in the gas phase (Å) at B3LYP/6-31G (d,p) level. .... 27
- For compound 3..... 31
  - Table S5. Gibbs free energies and equilibrium populations of low-energy conformer of **3** .....31

|                                                                                                                                                 |    |
|-------------------------------------------------------------------------------------------------------------------------------------------------|----|
| Table S6. Cartesian coordinates for the low-energy reoptimized of compound <b>3</b> in the gas phase (Å) at B3LYP/6-31G (d,p) level. ....       | 31 |
| • NMR calculation of compound 1.....                                                                                                            | 35 |
| Table S7. Cartesian coordinates for the low-energy reoptimized of <b>1a</b> and <b>1b</b> in the gas phase (Å) at B3LYP/6-31G (d,p) level ..... | 35 |
| • NMR Calculation of compound 2.....                                                                                                            | 36 |
| Table S8. Cartesian coordinates for the low-energy reoptimized of <b>2</b> in the gas phase (Å) at B3LYP/6-31G (d,p) level. ....                | 36 |
| • NMR Calculation of compound 3.....                                                                                                            | 37 |
| Table S9. Cartesian coordinates for the low-energy reoptimized of <b>3</b> in the gas phase (Å) at B3LYP/6-31G (d,p) level. ....                | 37 |

### Single Mass Analysis

Tolerance = 10.0 mDa / DBE: min = -1.5, max = 100.0

Element prediction: Off

Number of isotope peaks used for i-FIT = 3

Monoisotopic Mass, Even Electron Ions

226 formula(e) evaluated with 3 results within limits (all results (up to 1000) for each mass)

Elements Used:

C: 0-500 H: 0-1000 O: 0-200 Na: 0-1

NAINI 28 3 (0.068) Cm (2:11)

TOF MS ES+

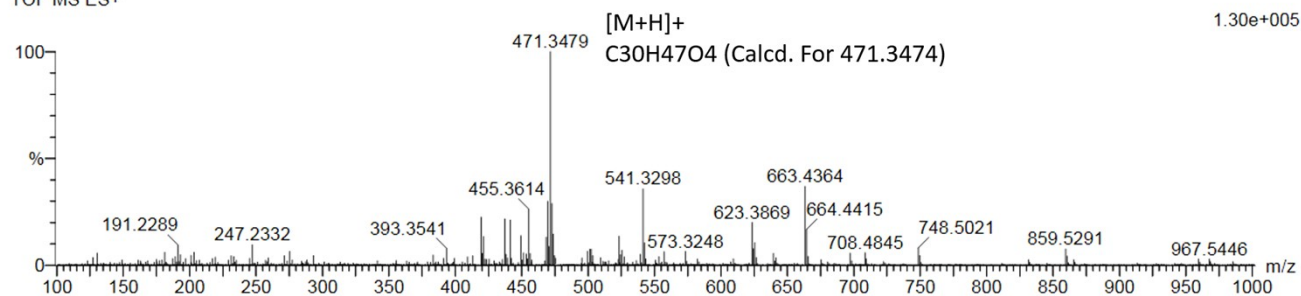

Minimum: -1.5  
Maximum: 10.0 10.0 100.0

| Mass     | Calc. Mass | mDa | PPM | DBE | i-FIT | i-FIT (Norm) | Formula                                        |
|----------|------------|-----|-----|-----|-------|--------------|------------------------------------------------|
| 471.3479 | 471.3474   | 0.5 | 1.1 | 7.5 | 13.9  | 1.9          | C <sub>30</sub> H <sub>47</sub> O <sub>4</sub> |

Figure S1. Mass Spectrum of **1**

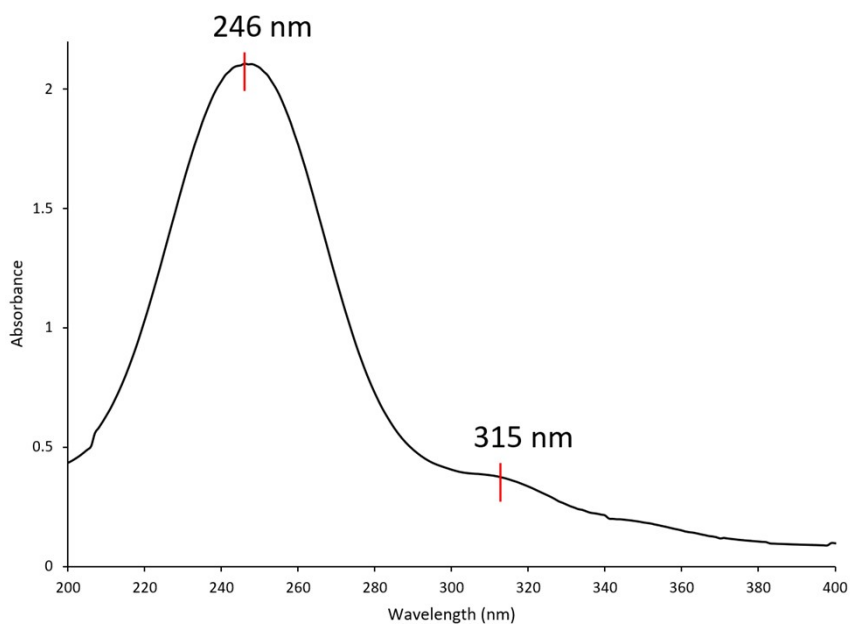

Figure S2. UV spectrum of **1**

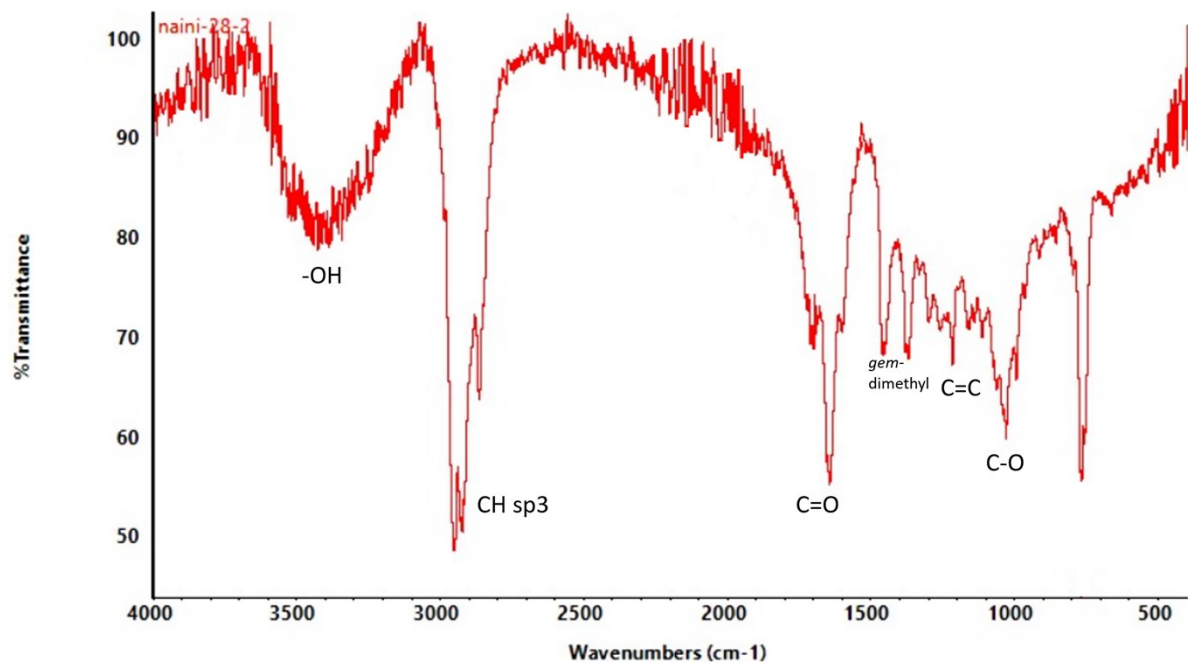

Figure S3. IR spectrum of 1

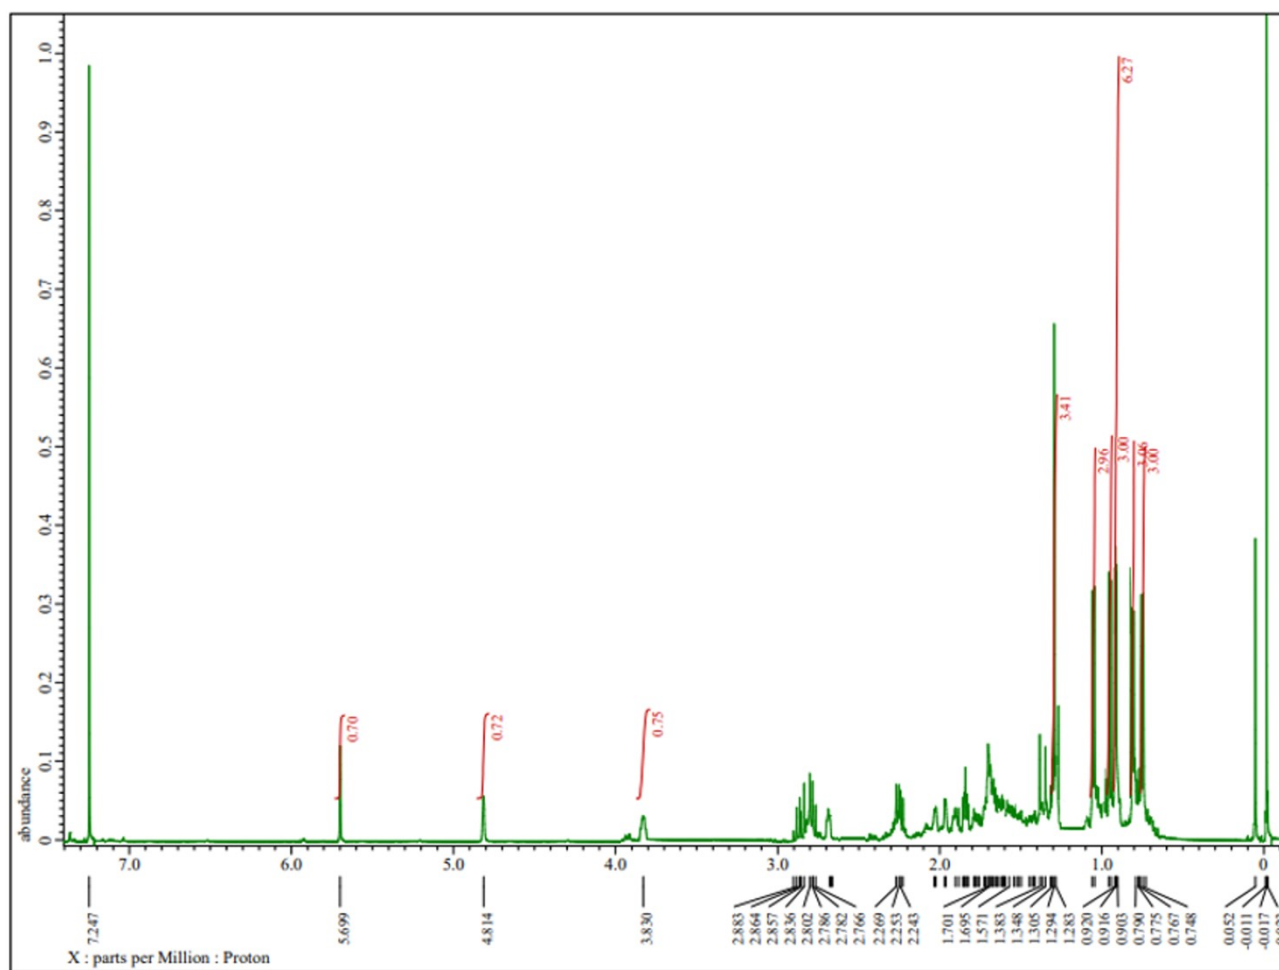

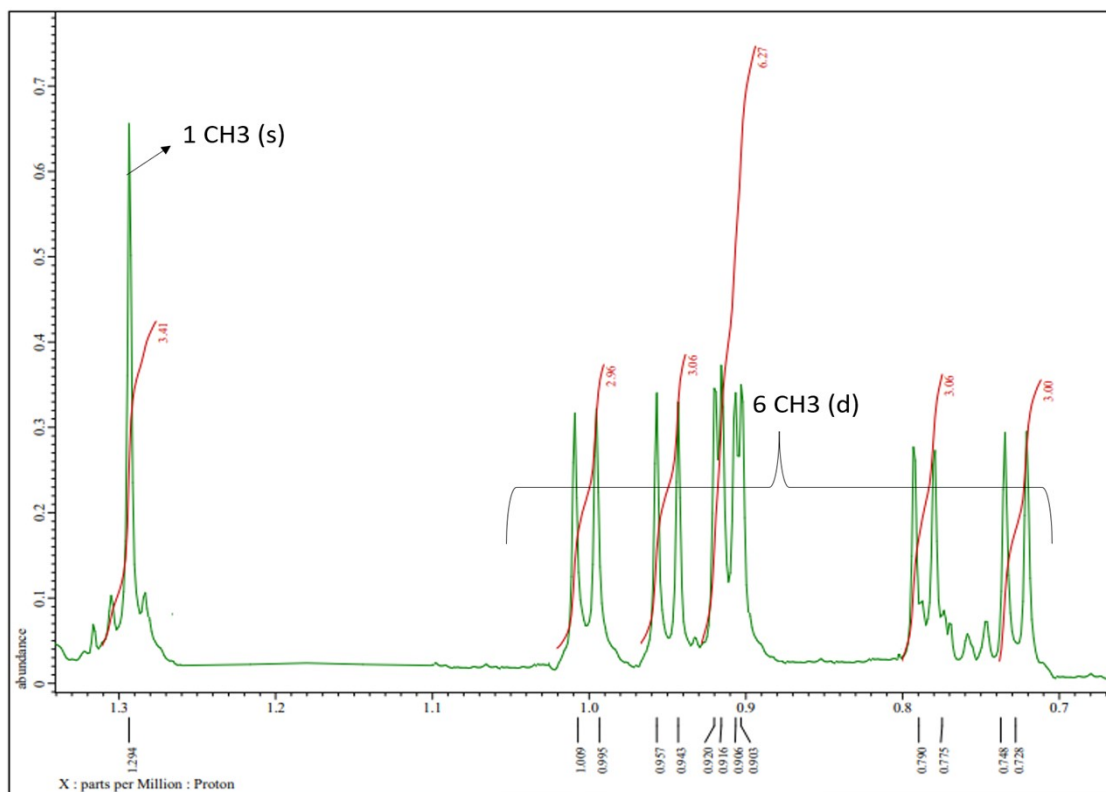

Figure S4.  $^1\text{H}$  NMR of **1**

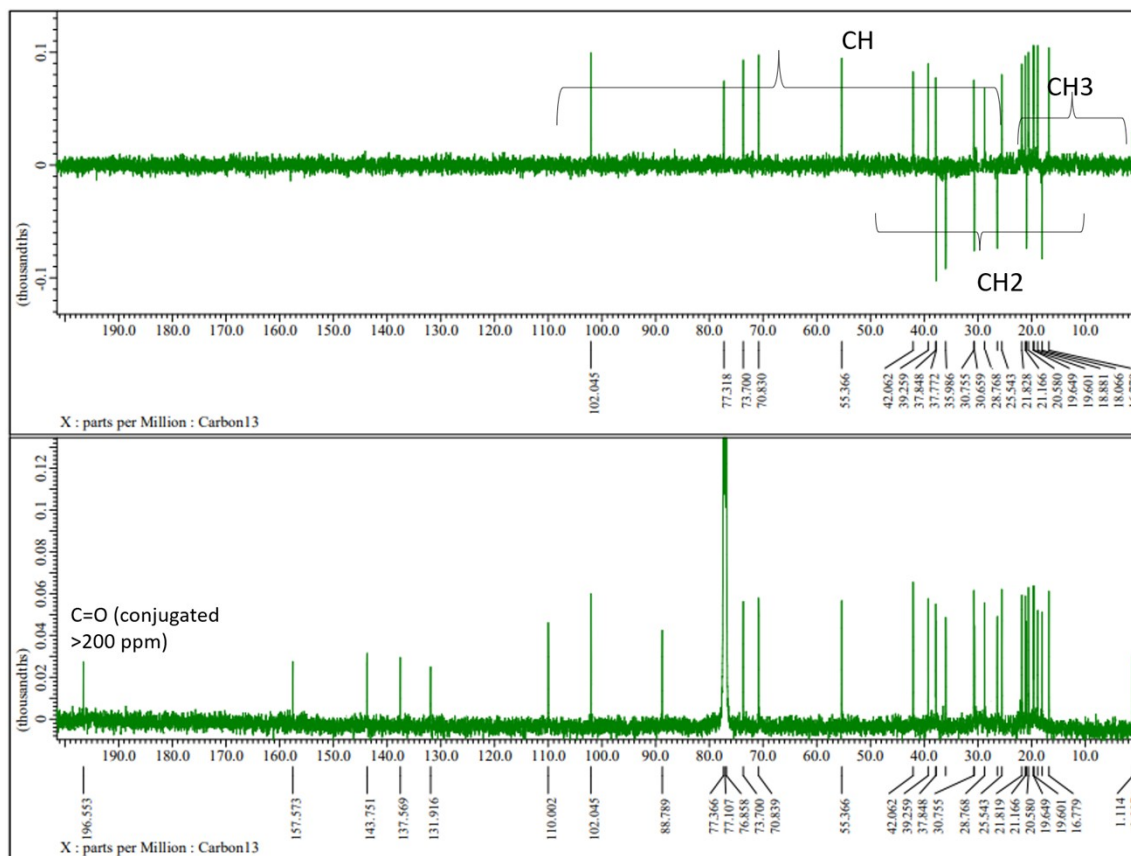

Figure S5.  $^{13}\text{C}$ -DEPT NMR of **1**

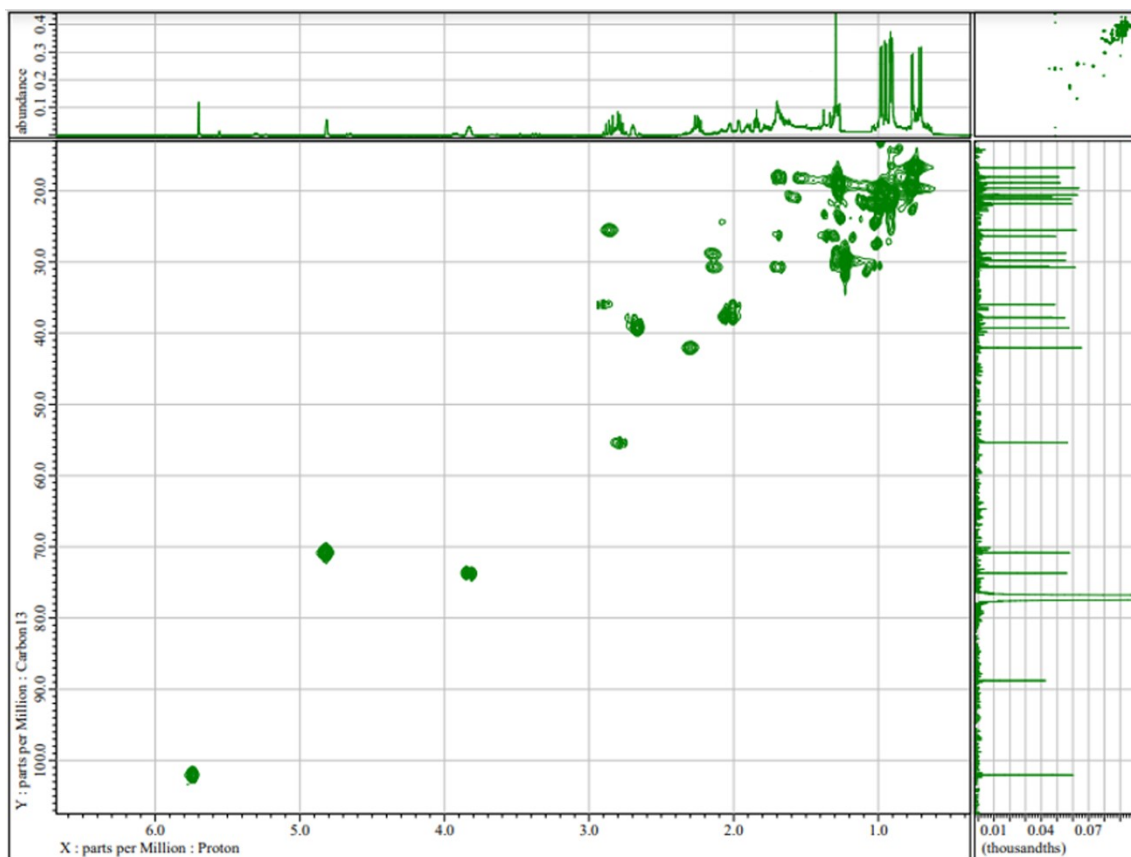

Figure S6. HMQC spectrum of **1**

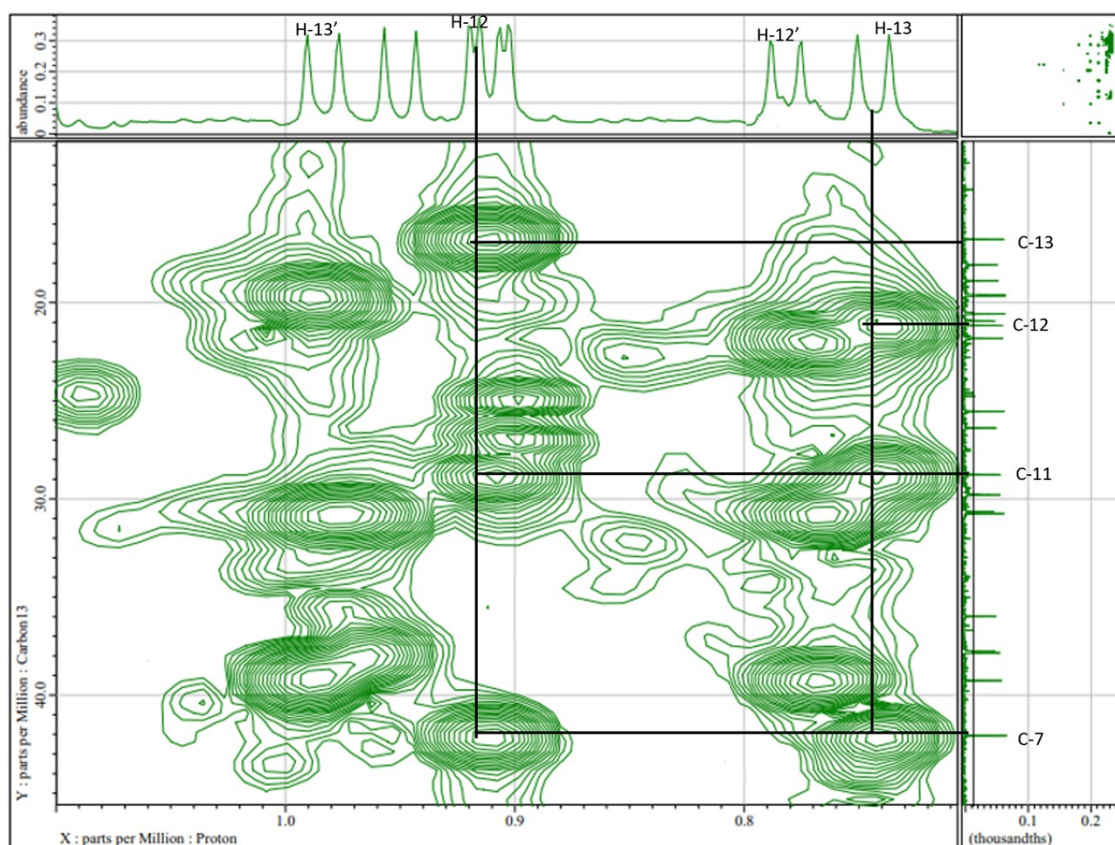

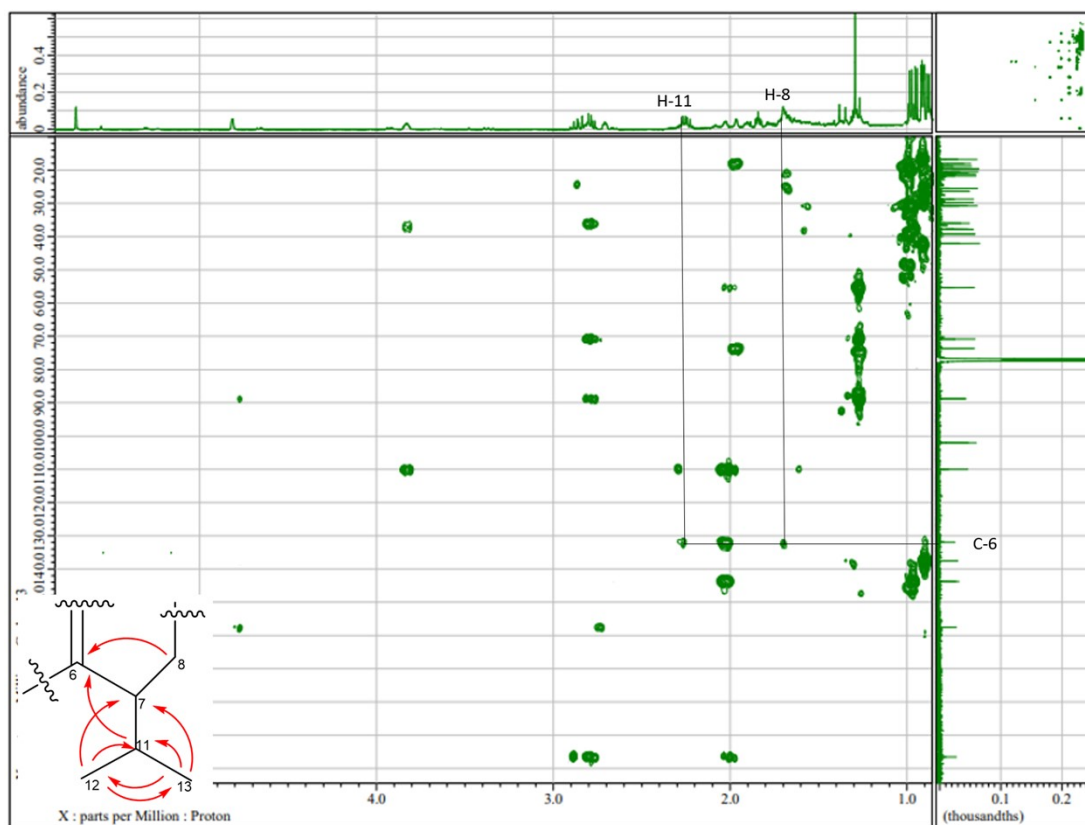

Figure S7. HMBC of **1** (A Unit)

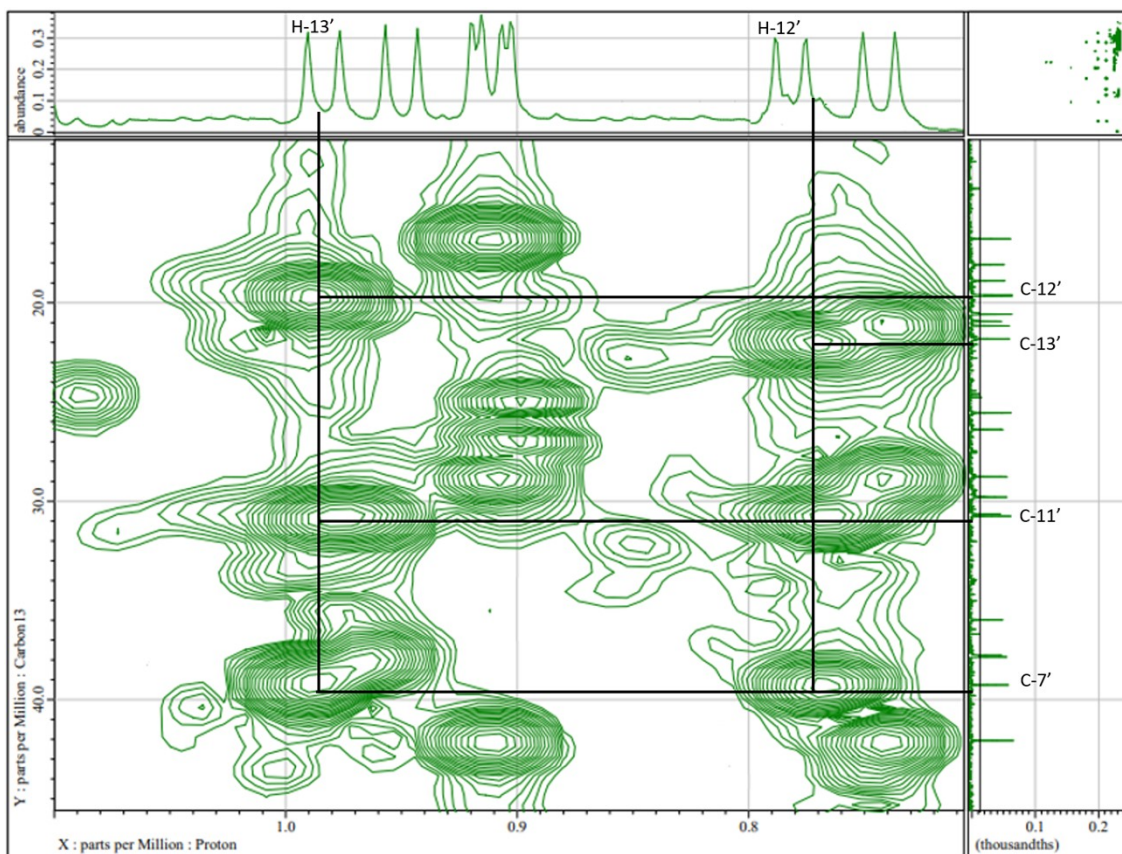



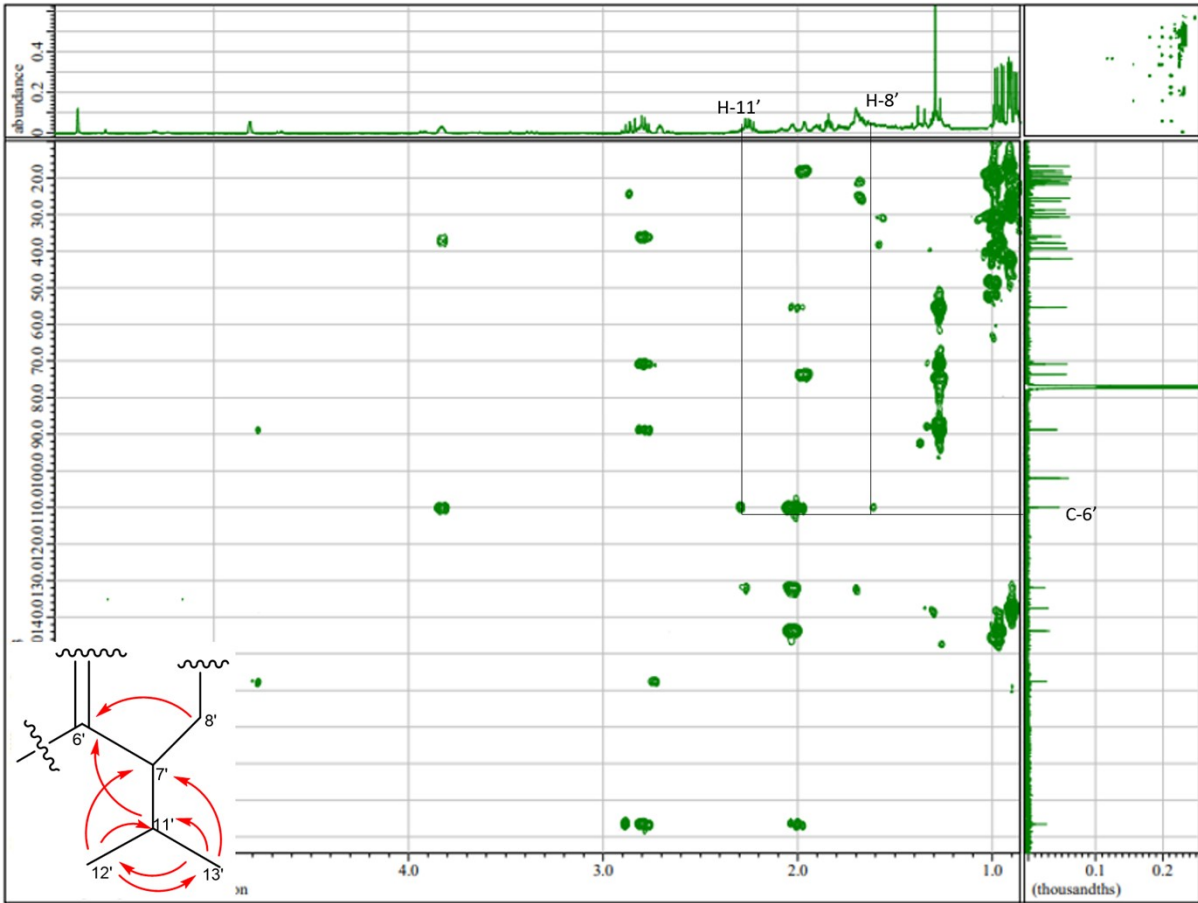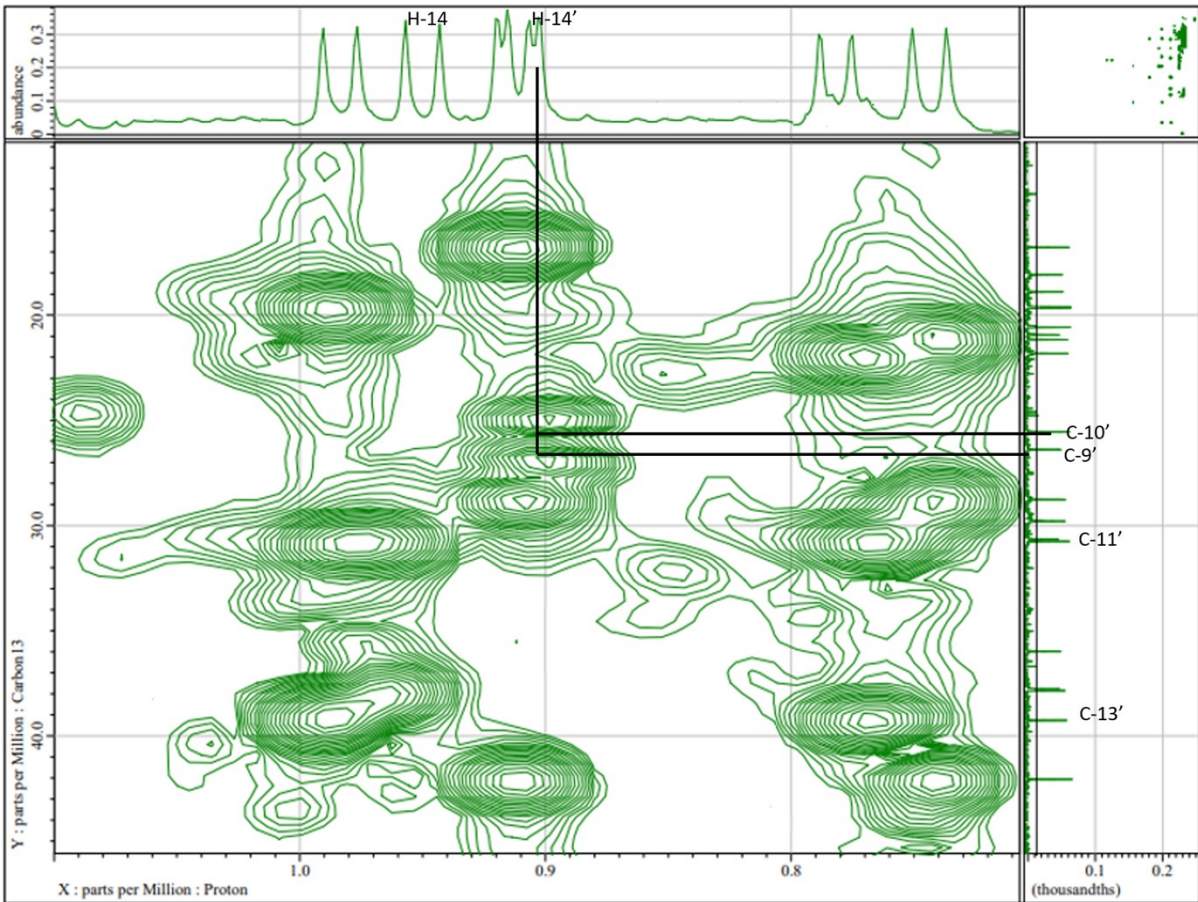

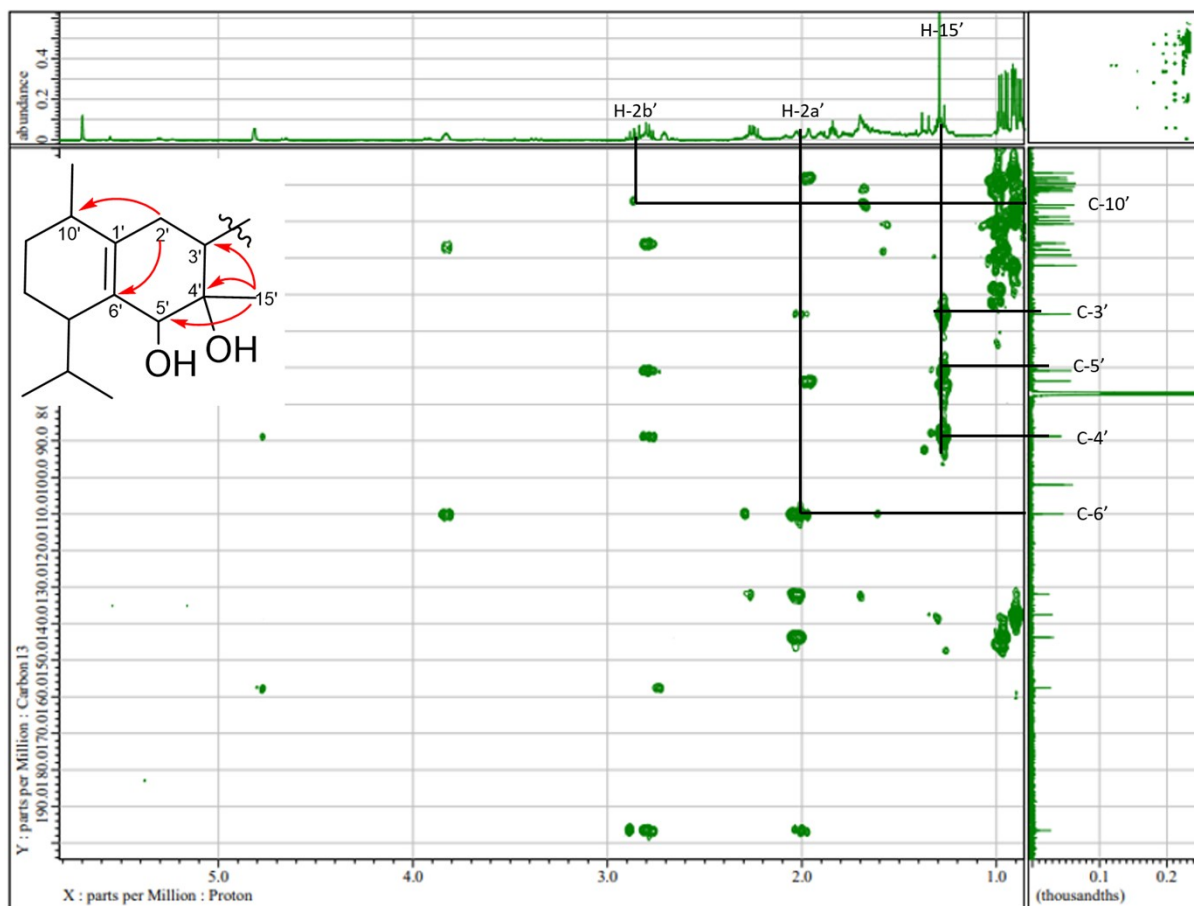

Figure S8. HMBC of **1** (B Unit)

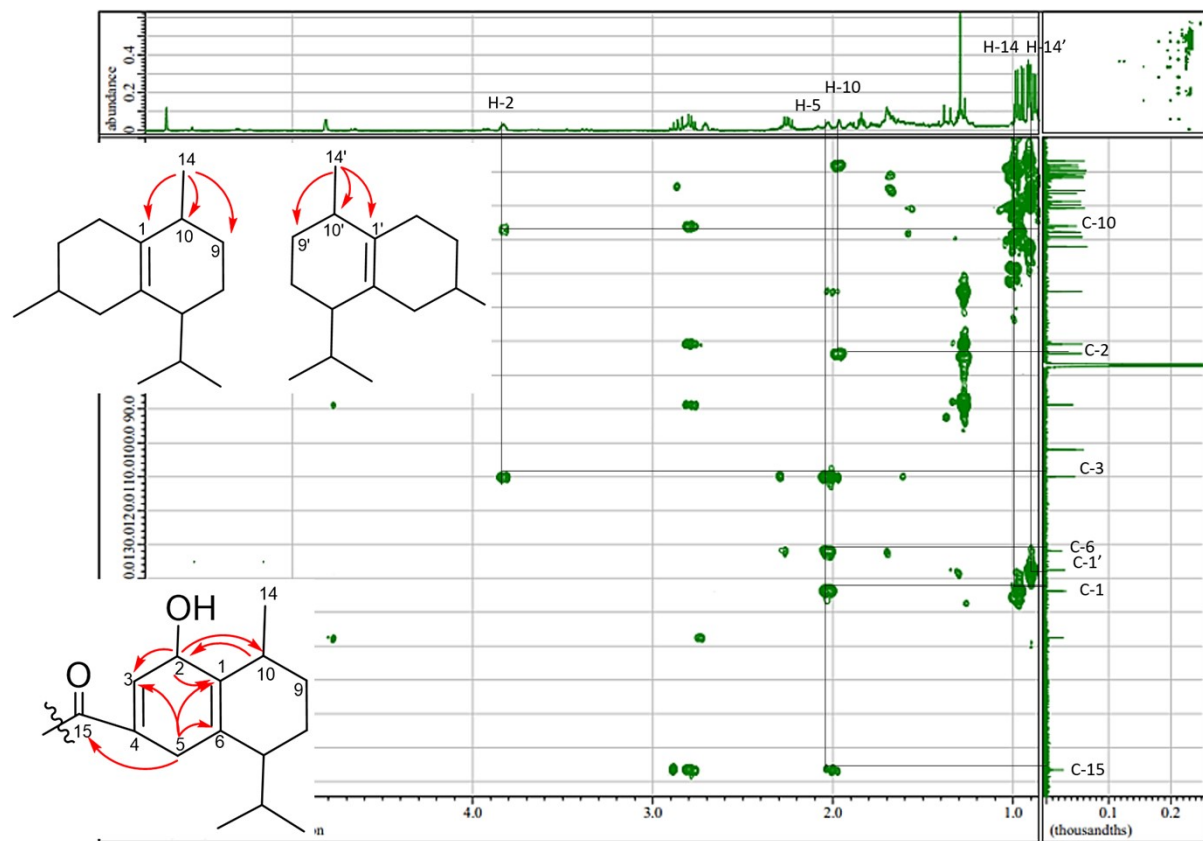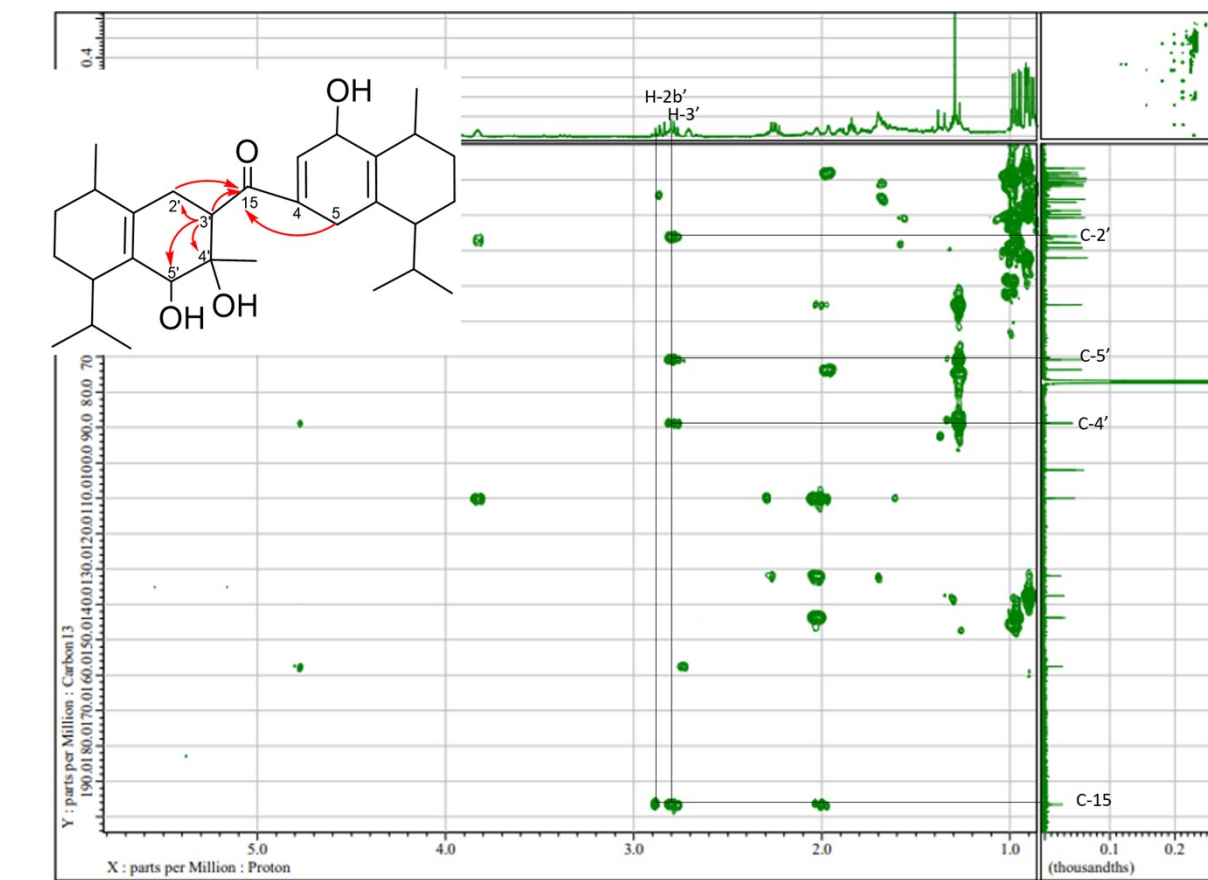

Figure S9. HMBC of **1** (A and B units)

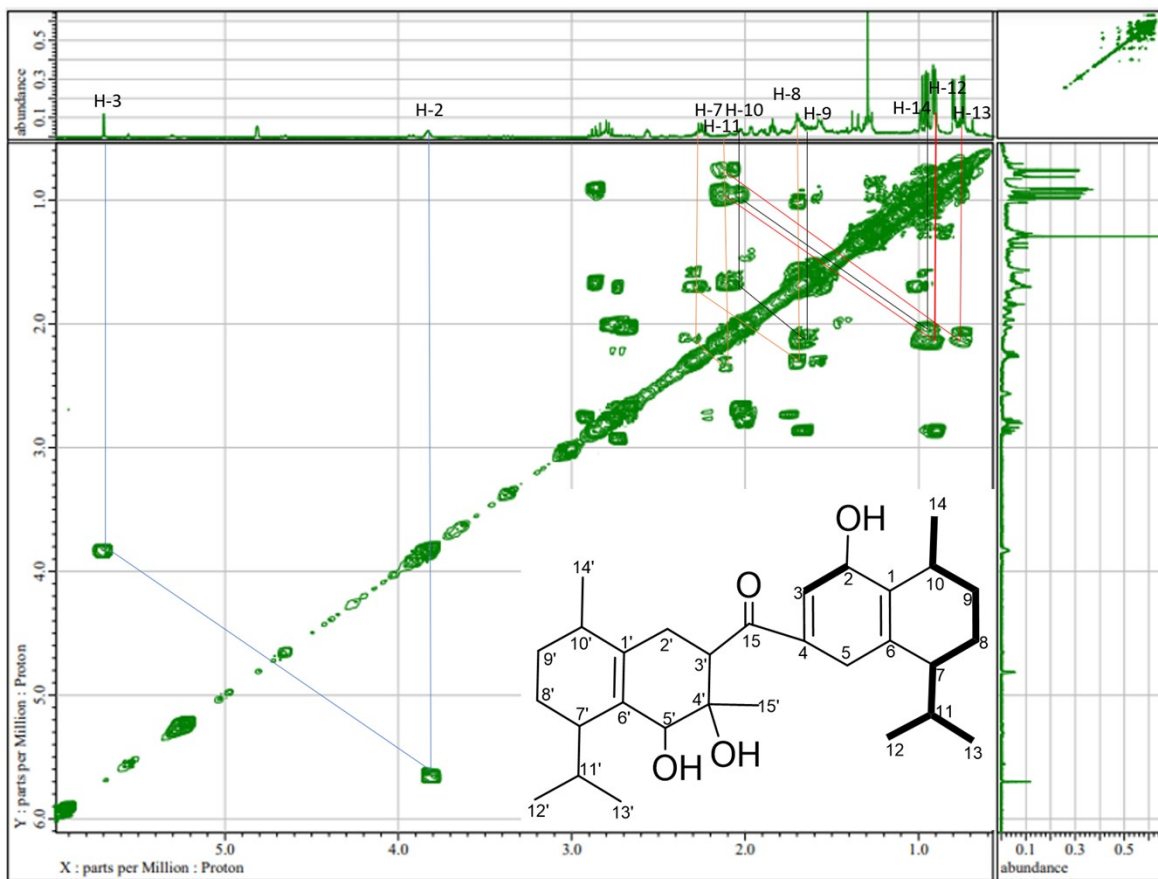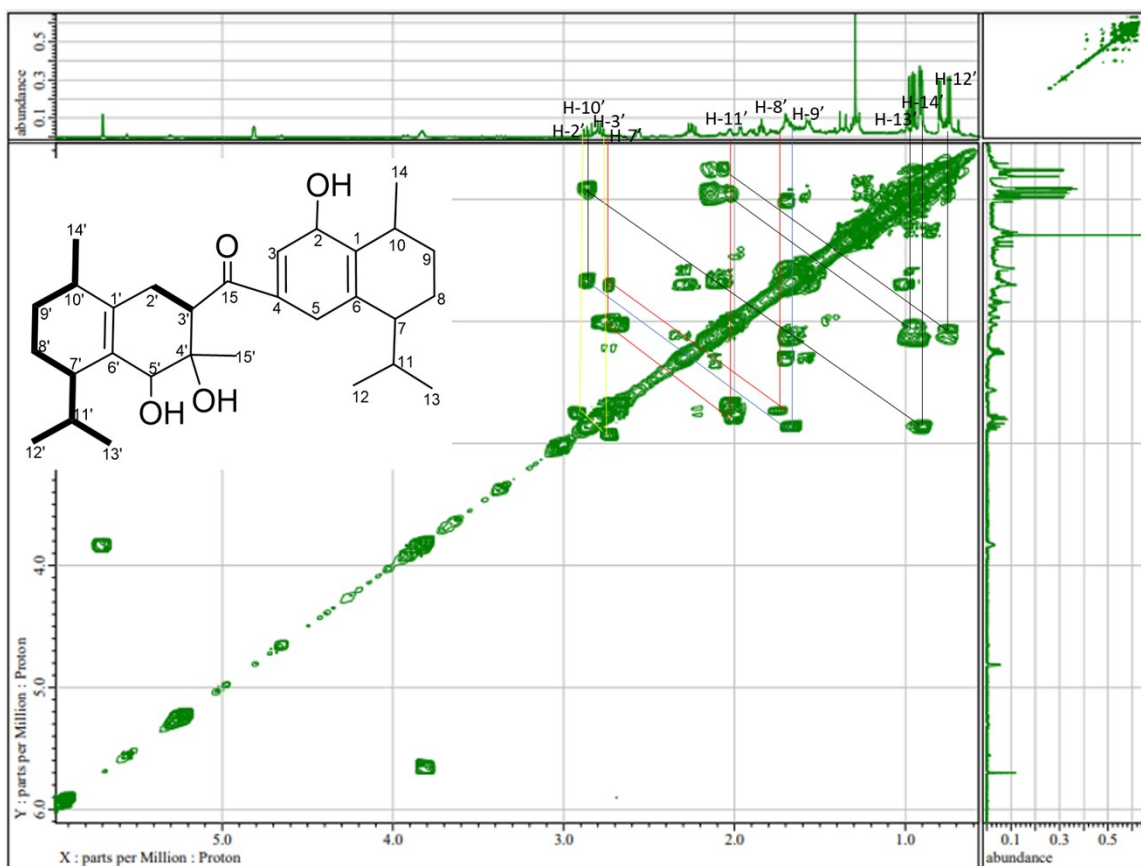

Figure S10.  $^1\text{H}$ - $^1\text{H}$  COSY of **1**

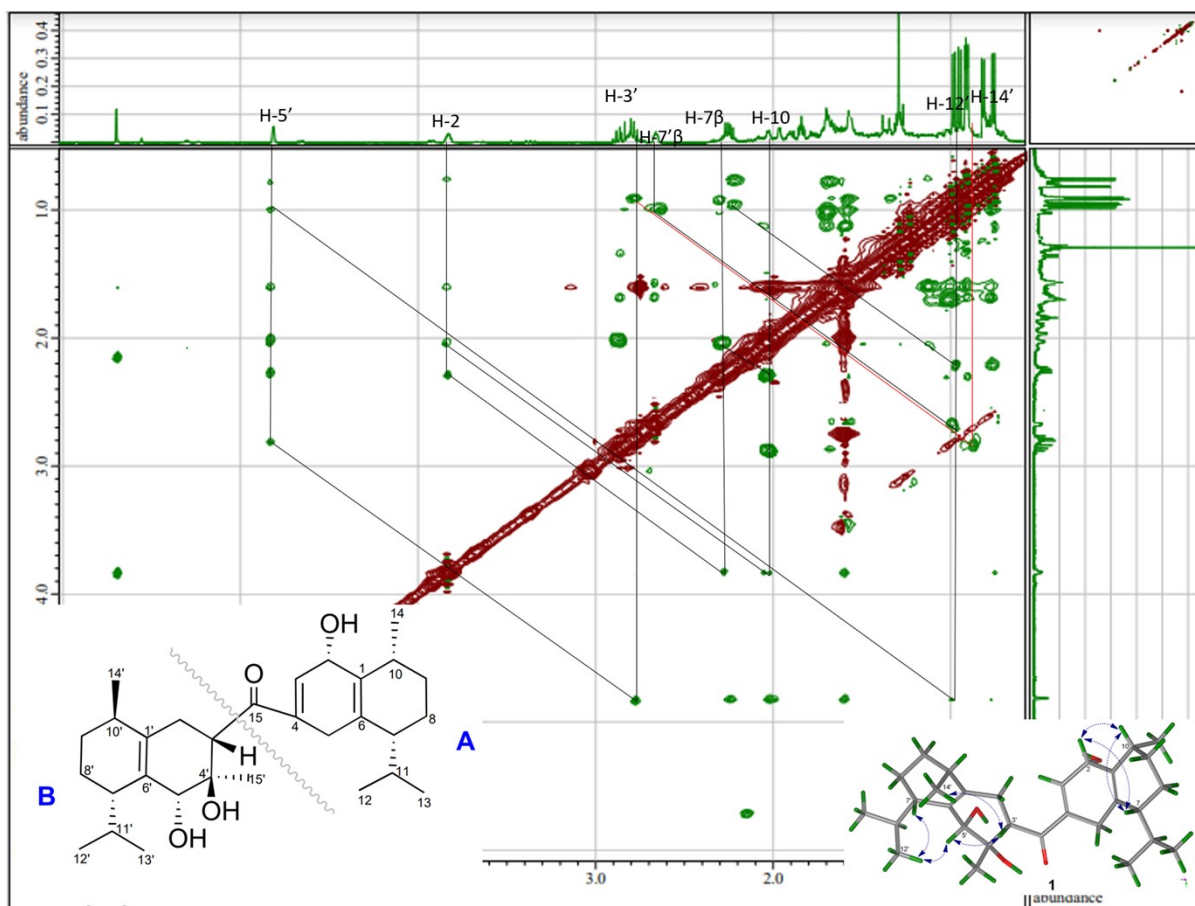

Figure S11.  $^1\text{H}$ - $^1\text{H}$  NOESY of **1**

### Single Mass Analysis

Tolerance = 10.0 mDa / DBE: min = -1.5, max = 100.0

Element prediction: Off

Number of isotope peaks used for i-FIT = 3

Monoisotopic Mass, Even Electron Ions

87 formula(e) evaluated with 3 results within limits (all results (up to 1000) for each mass)

Elements Used:

C: 0-500 H: 0-1000 O: 0-200 Na: 0-1

NAINI 30 14 (0.255) Cm (12:16)

TOF MS ES+

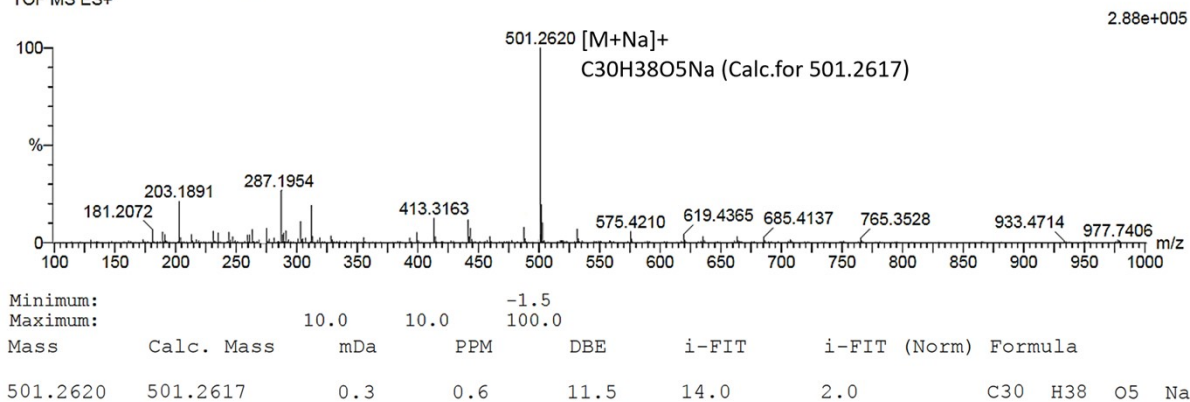

Figure S12. Mass spectrum of **2**

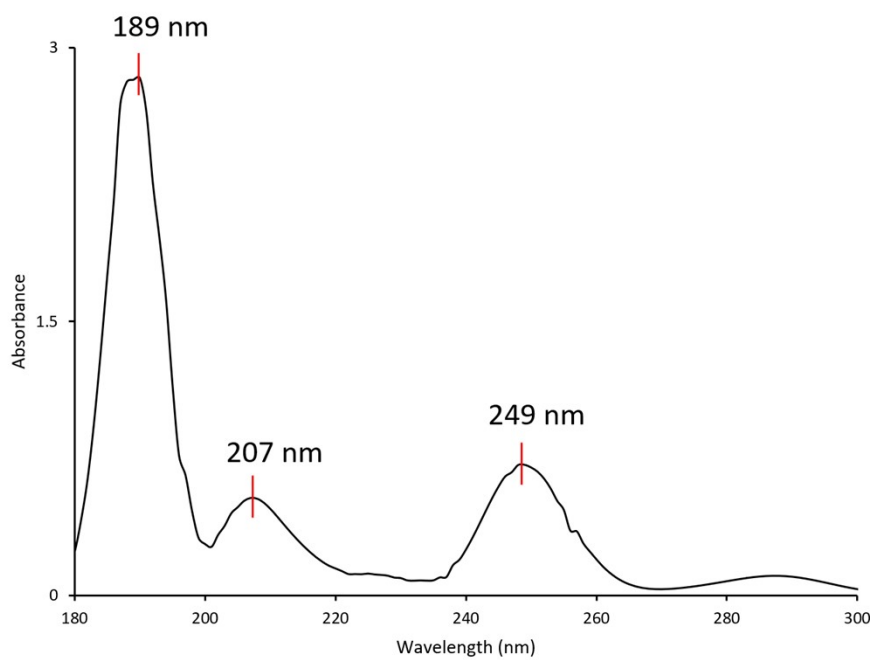

Figure S13. UV spectrum of **2**

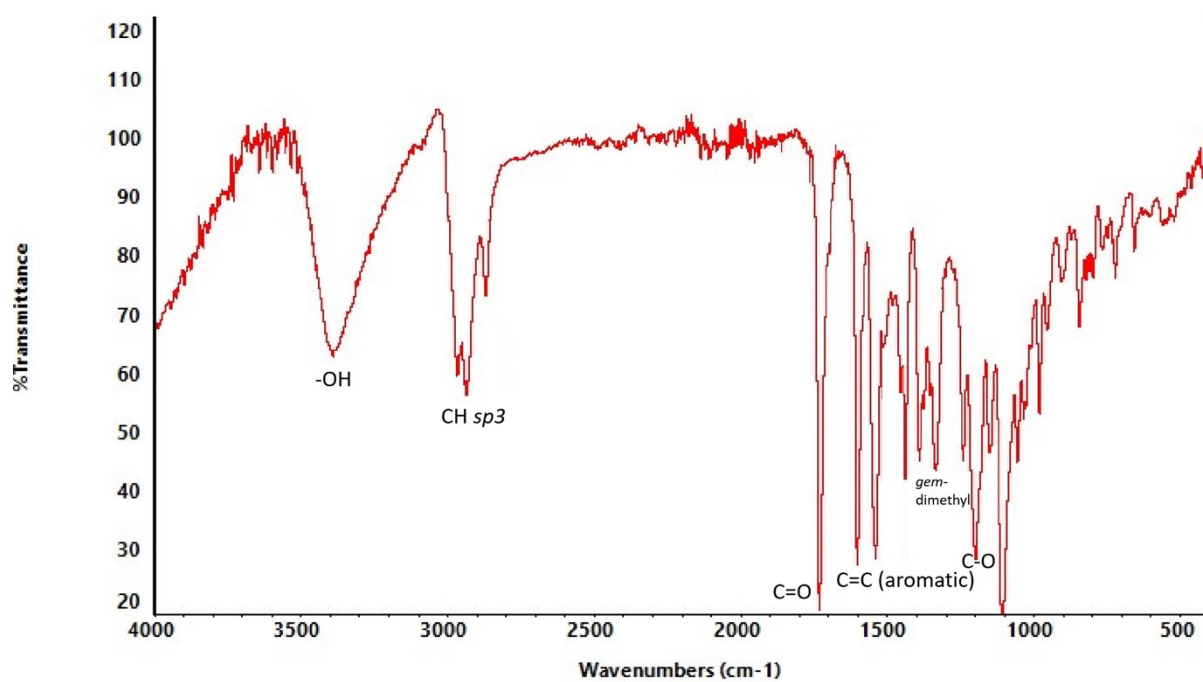

Figure S14. IR spectrum of **2**

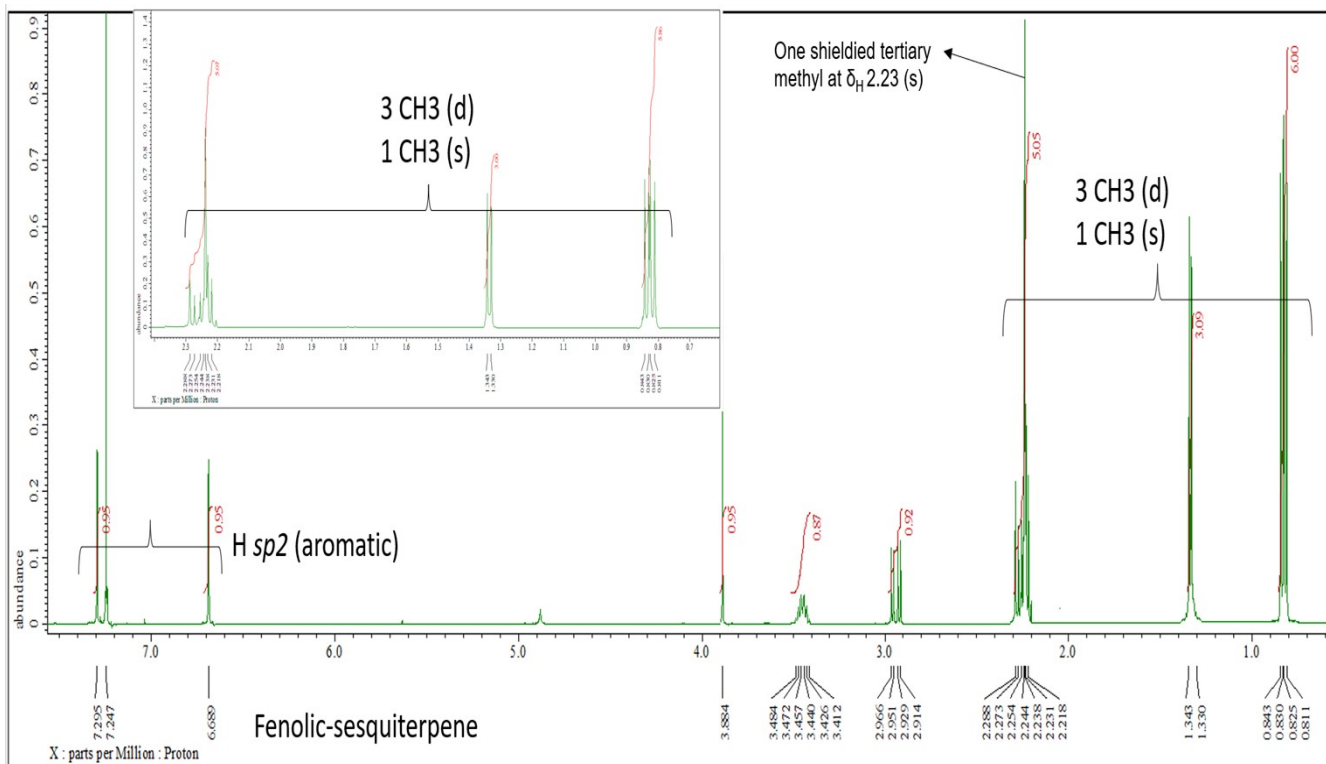

Figure S15. <sup>1</sup>H NMR of **2**

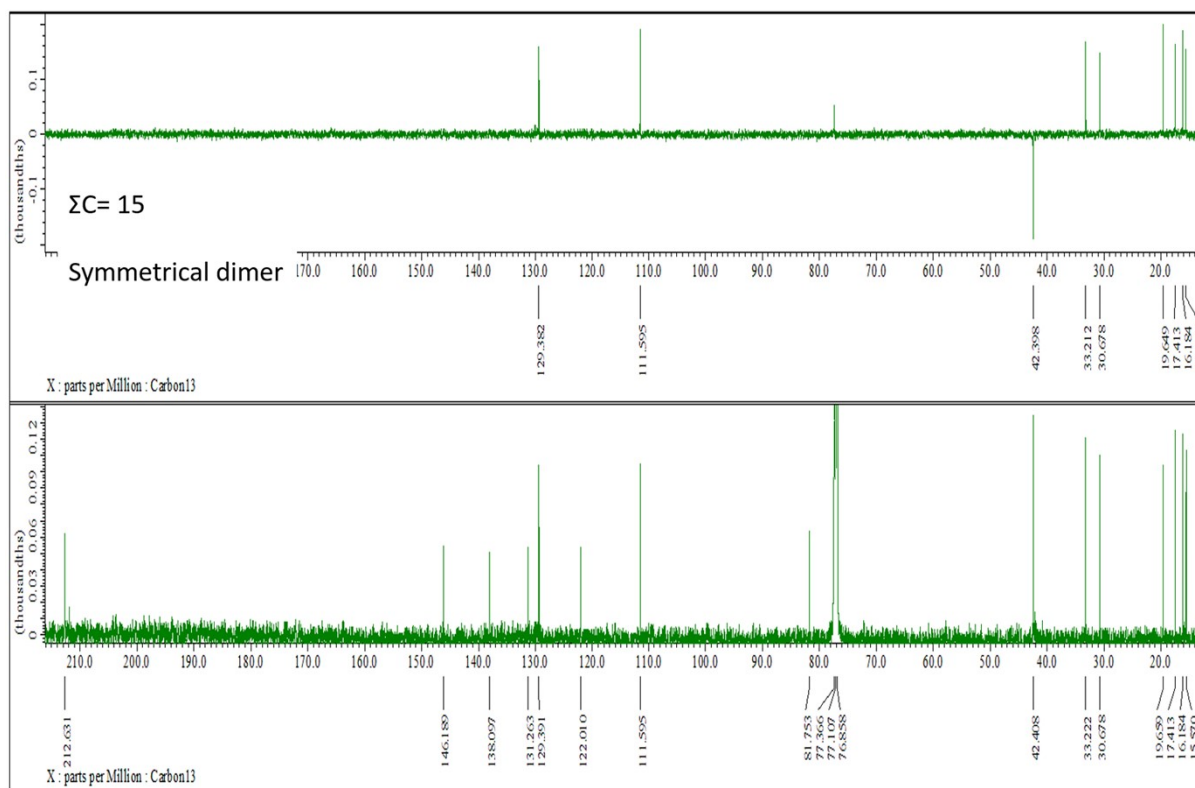

Figure S16. <sup>13</sup>C-DEPT NMR of **2**

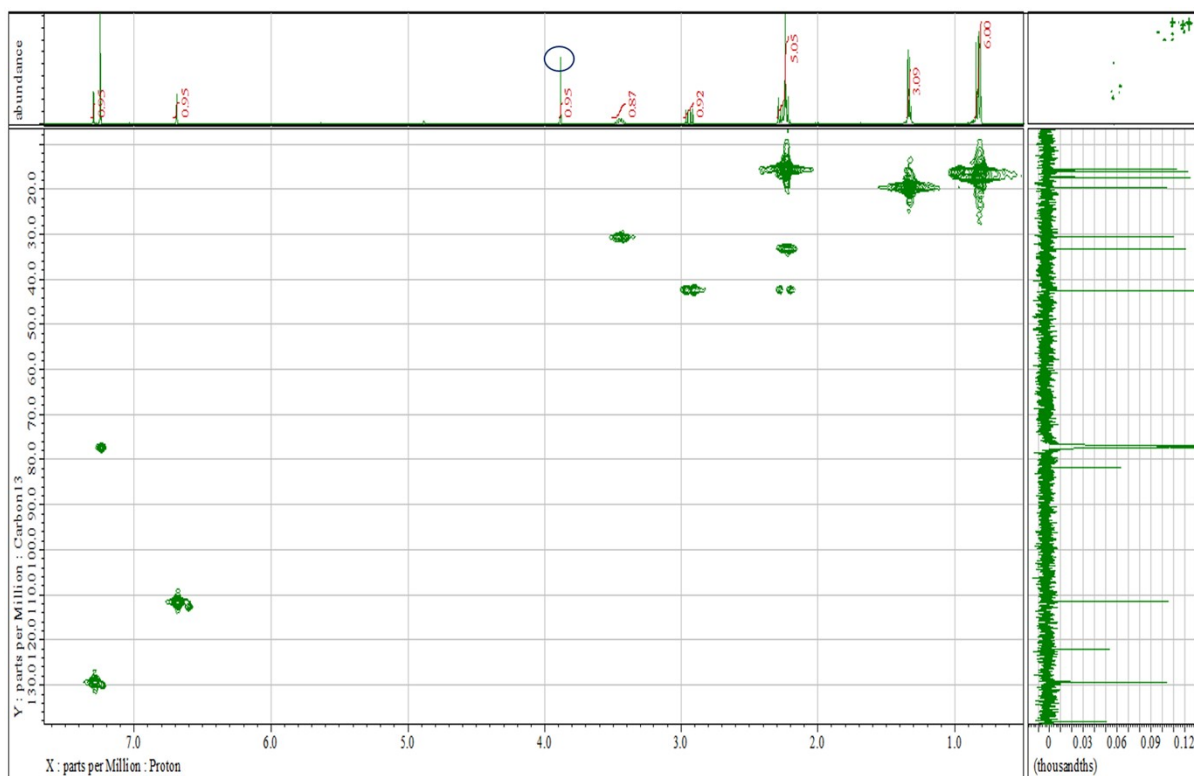

Figure S17. HMQC spectrum of 2

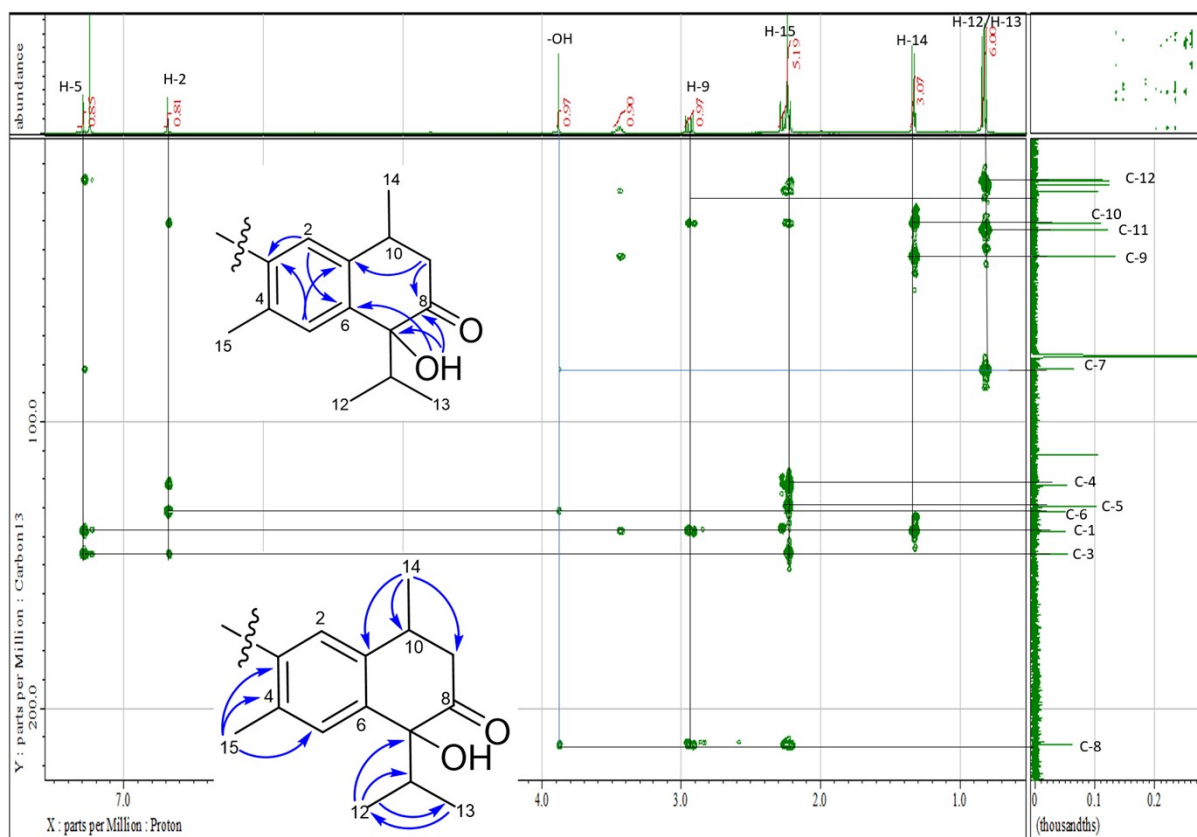

Figure S18. HMBC spectrum of 2



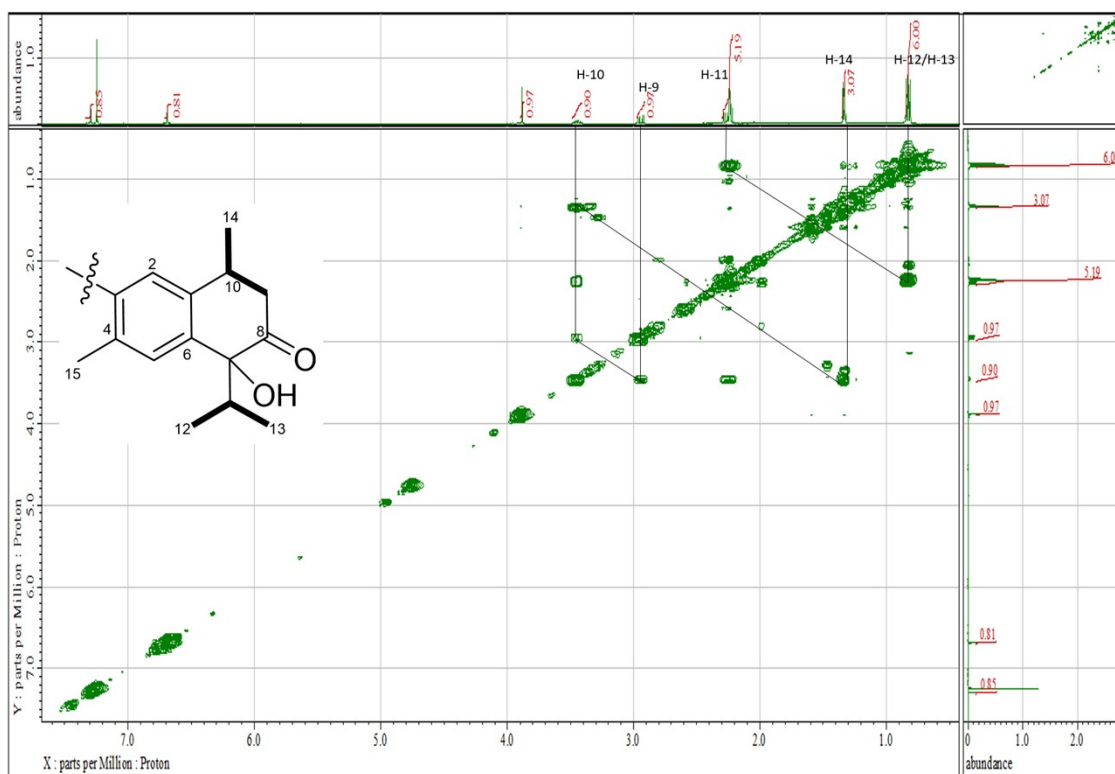

Figure S19.  $^1\text{H}$ - $^1\text{H}$  COSY of **2**

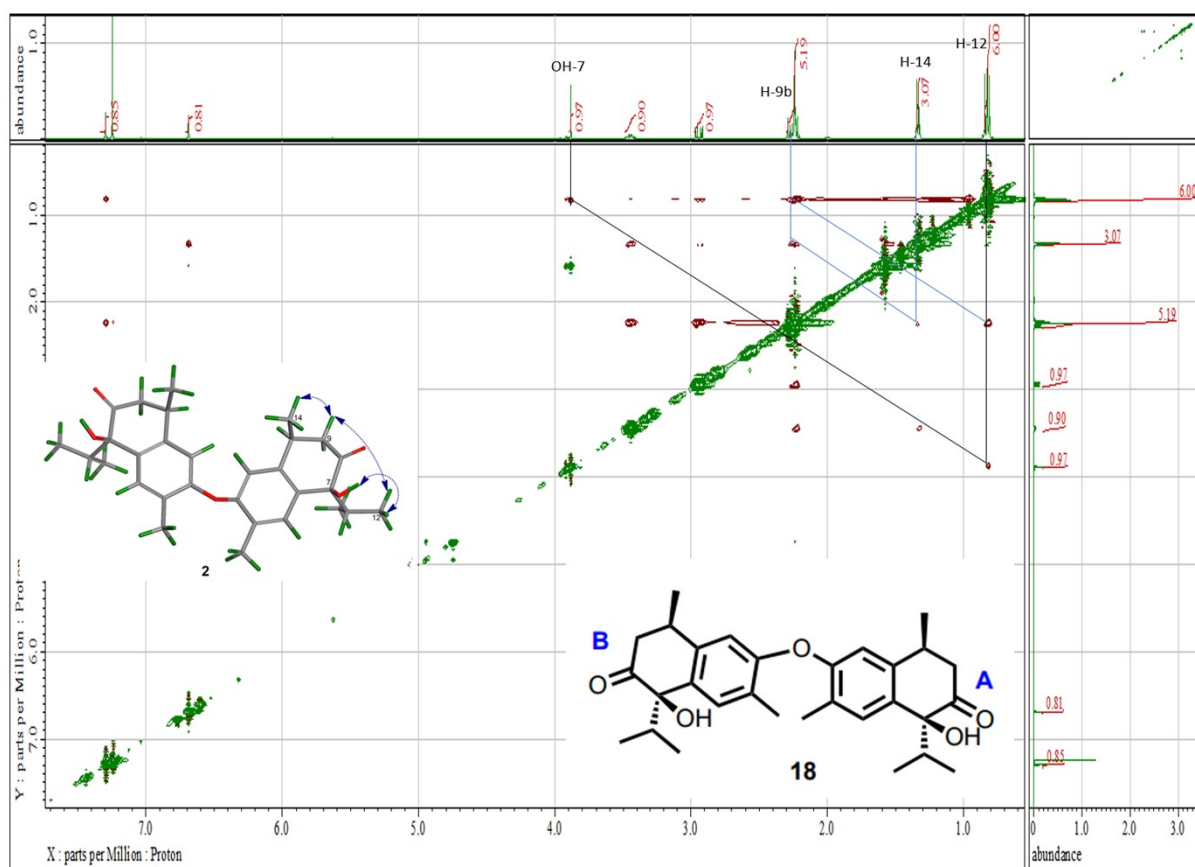

Figure S20.  $^1\text{H}$ - $^1\text{H}$  NOESY of **2**

### Single Mass Analysis

Tolerance = 10.0 mDa / DBE: min = -1.5, max = 100.0

Element prediction: Off

Number of isotope peaks used for i-FIT = 3

Monoisotopic Mass, Even Electron Ions

155 formula(e) evaluated with 3 results within limits (all results (up to 1000) for each mass)

Elements Used:

C: 0-500 H: 0-1000 O: 0-200 Na: 0-1

NAINI 39 108 (1.853) Cm (108:113)

TOF MS ES+

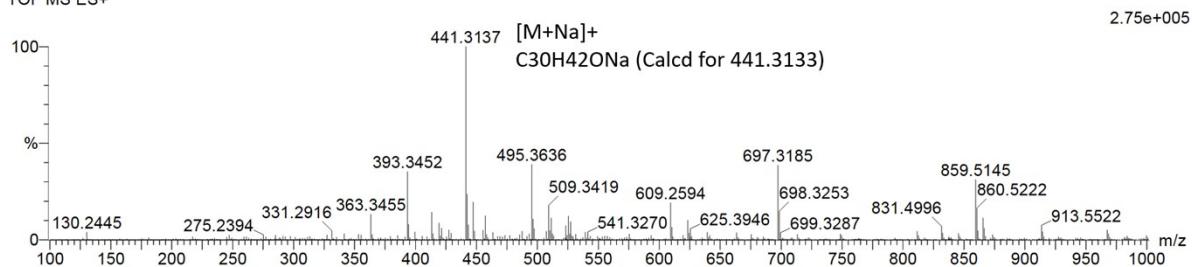

Minimum:

Maximum: 10.0 10.0 -1.5

| Mass     | Calc. Mass | mDa | PPM | DBE | i-FIT | i-FIT (Norm) | Formula      |
|----------|------------|-----|-----|-----|-------|--------------|--------------|
| 441.3137 | 441.3133   | 0.4 | 0.9 | 9.5 | 13.6  | 1.5          | C30 H42 O Na |

Figure S21. Mass spectrum of **3**

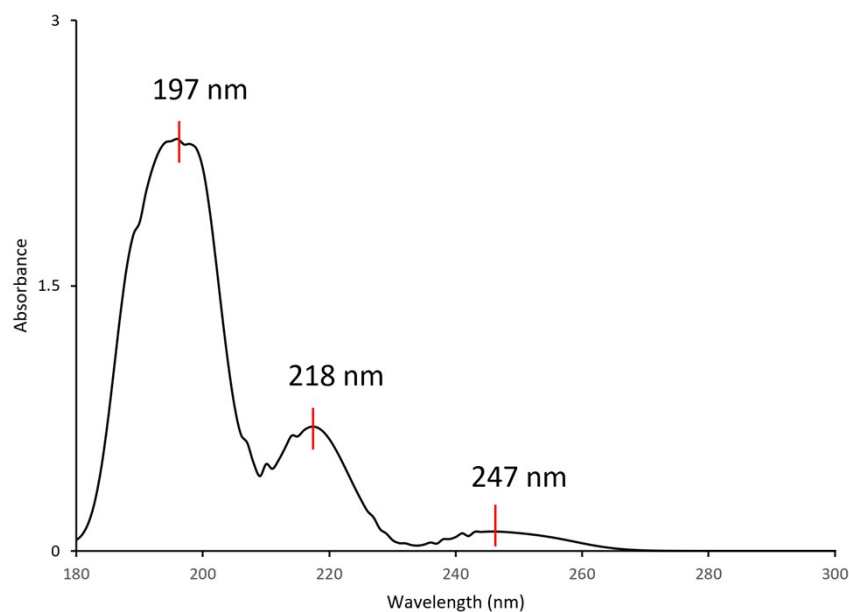

Figure S22. UV spectrum of **3**

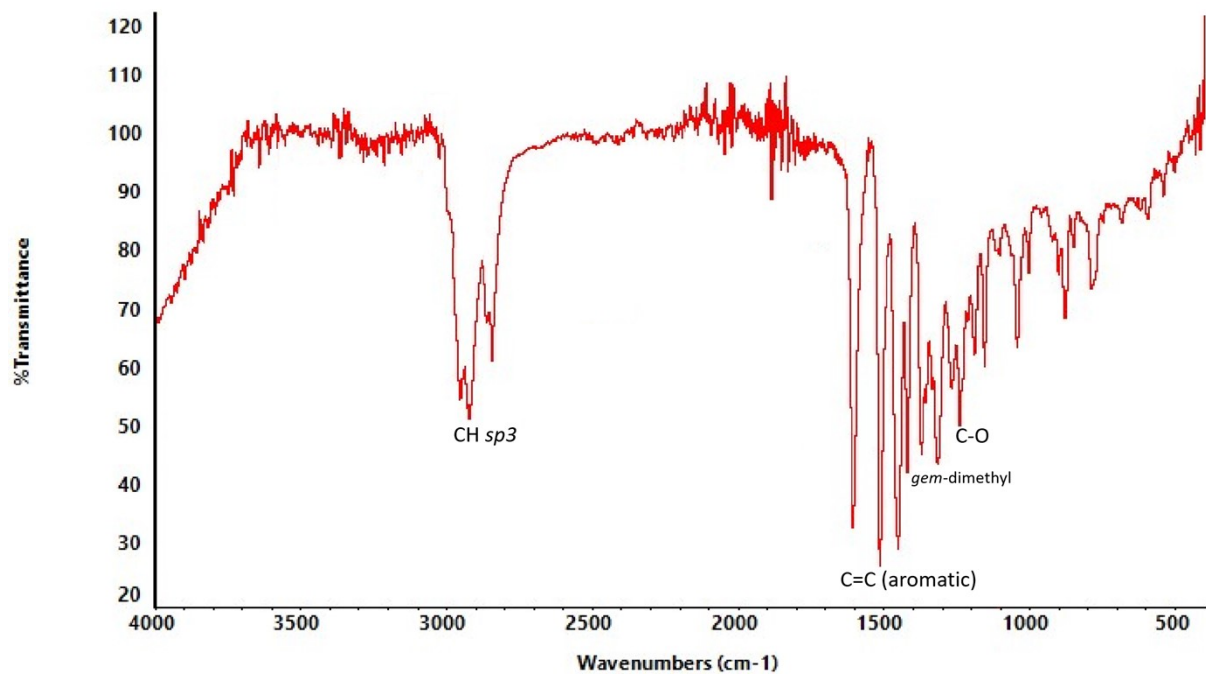

Figure S.23. IR spectrum of **3**

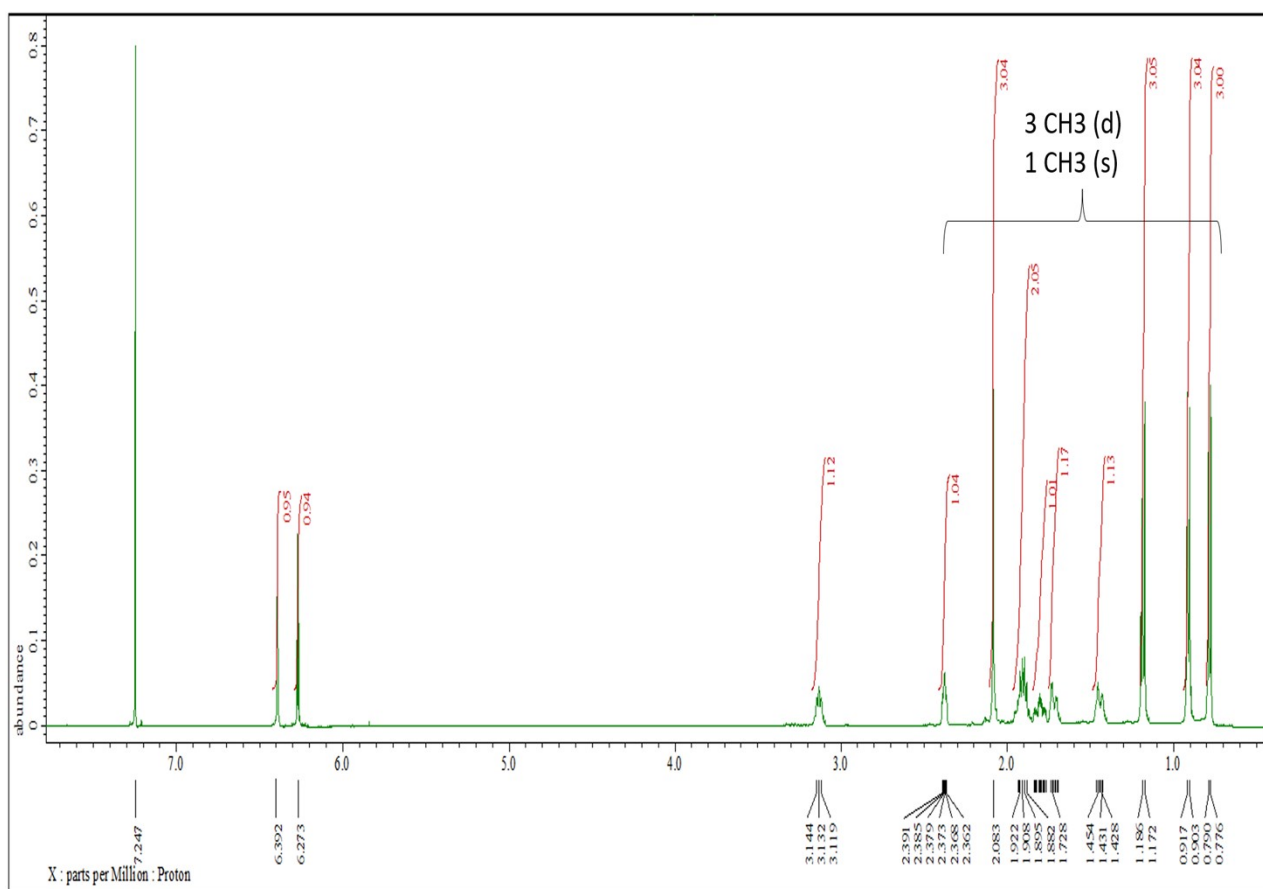

Figure S24. <sup>1</sup>H NMR of **3**

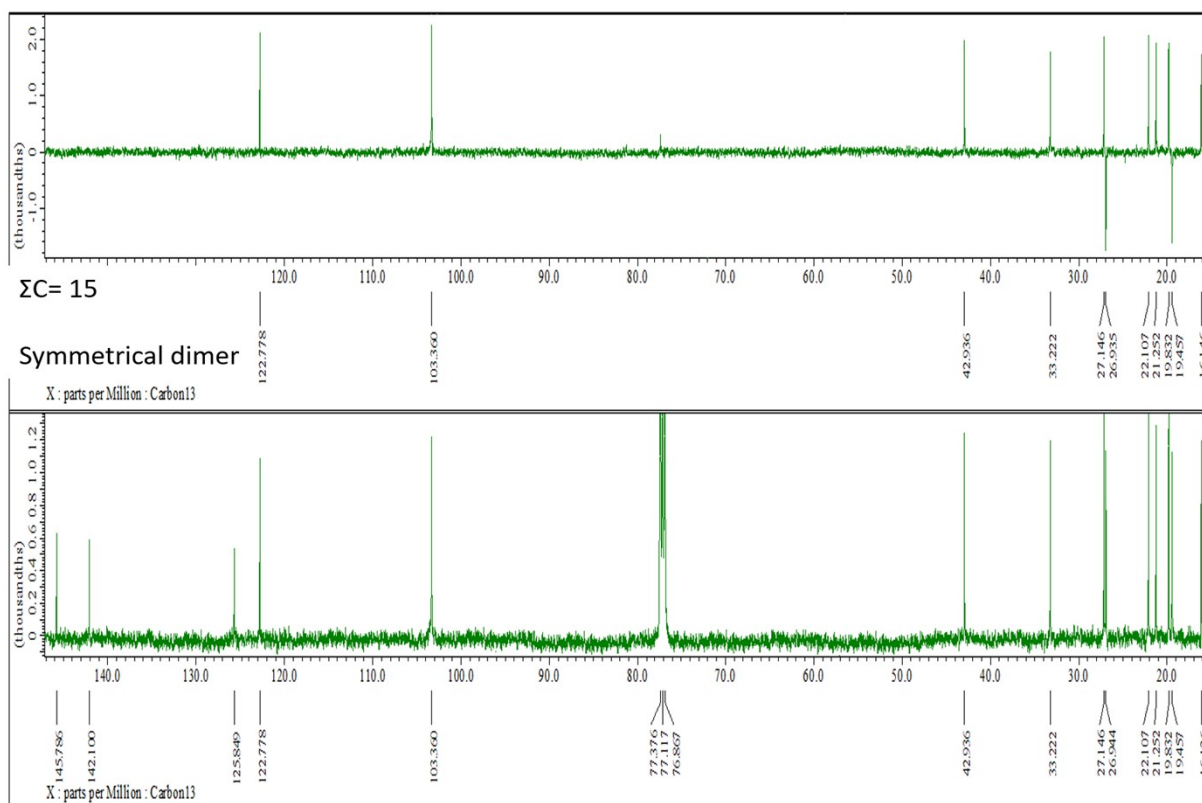

Figure S25.  $^{13}\text{C}$ -DEPT NMR of **3**

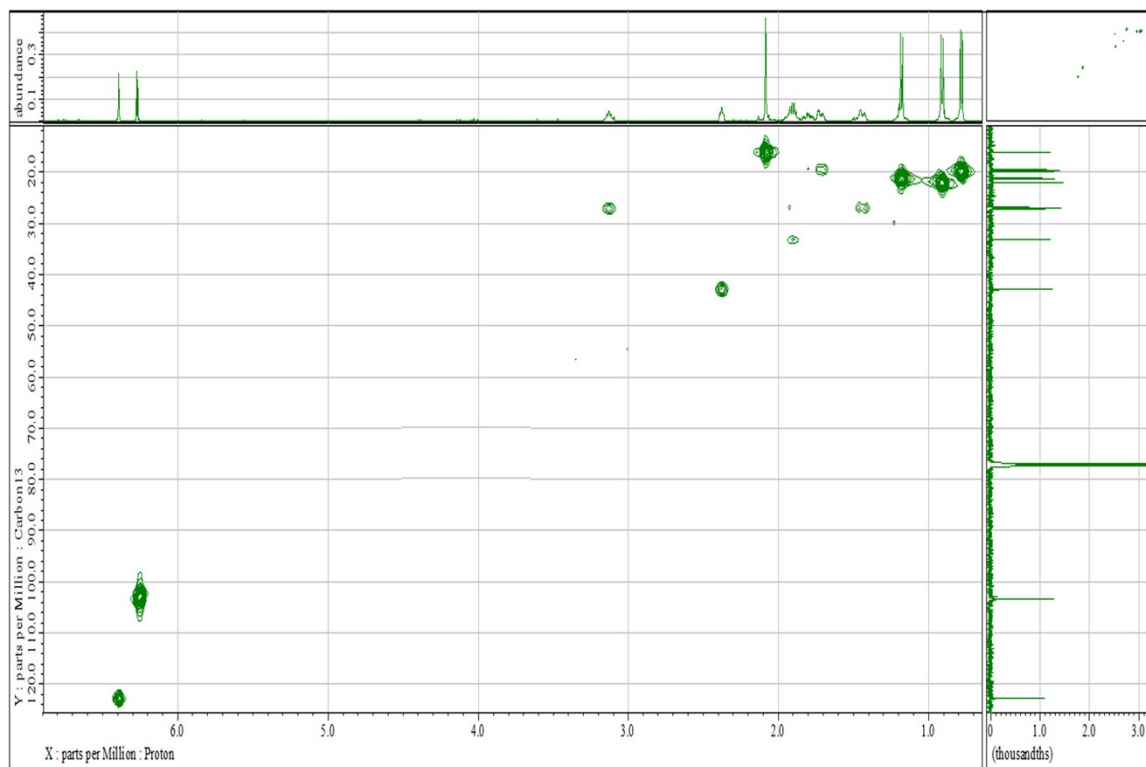

Figure S26. HMQC spectrum of **3**

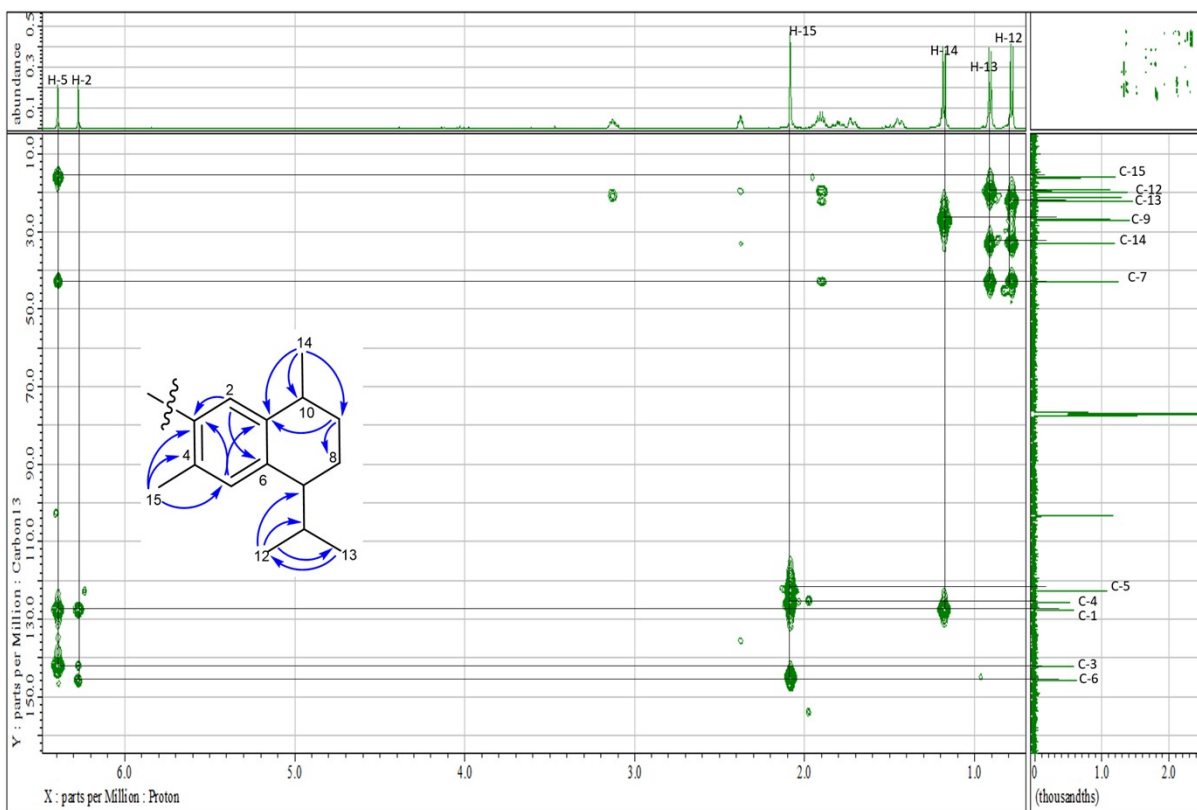

Figure S27. HMBC spectrum of **3**

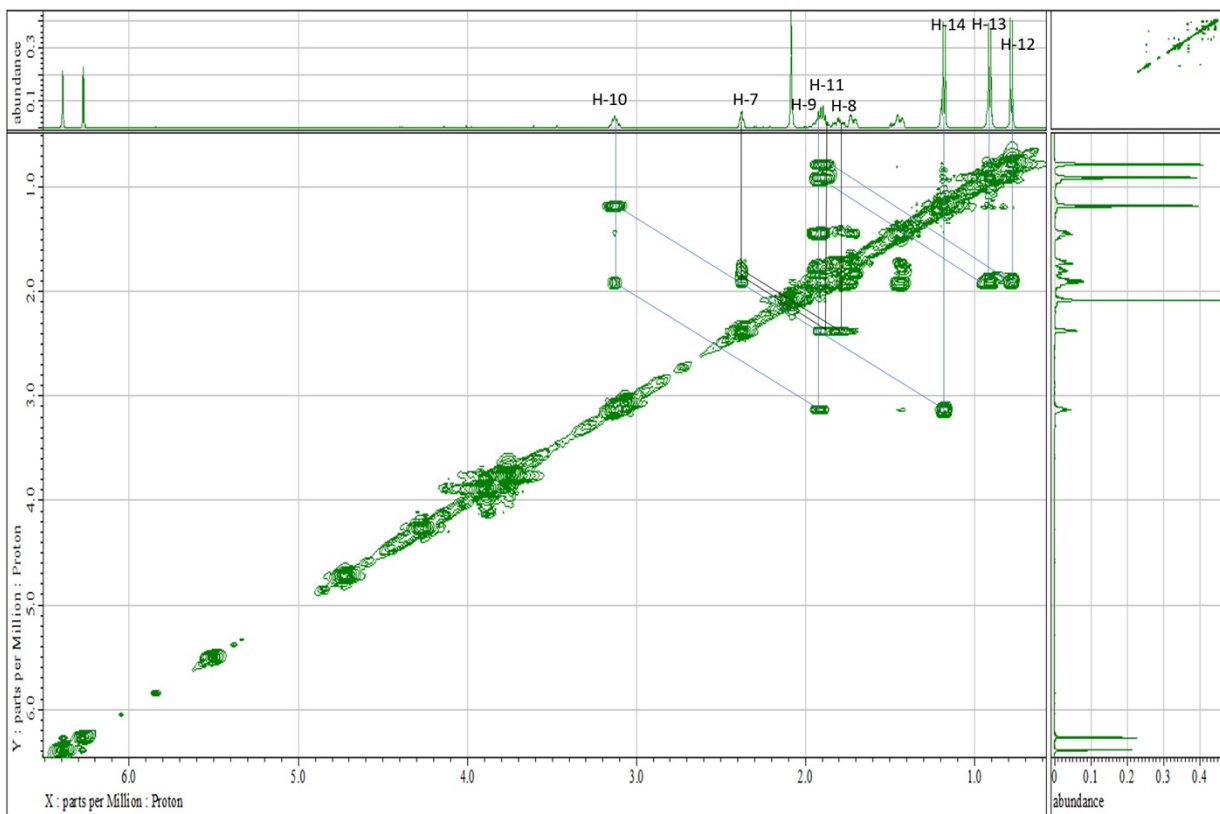

Figure S28.  $^1\text{H}$ - $^1\text{H}$  COSY of **3**

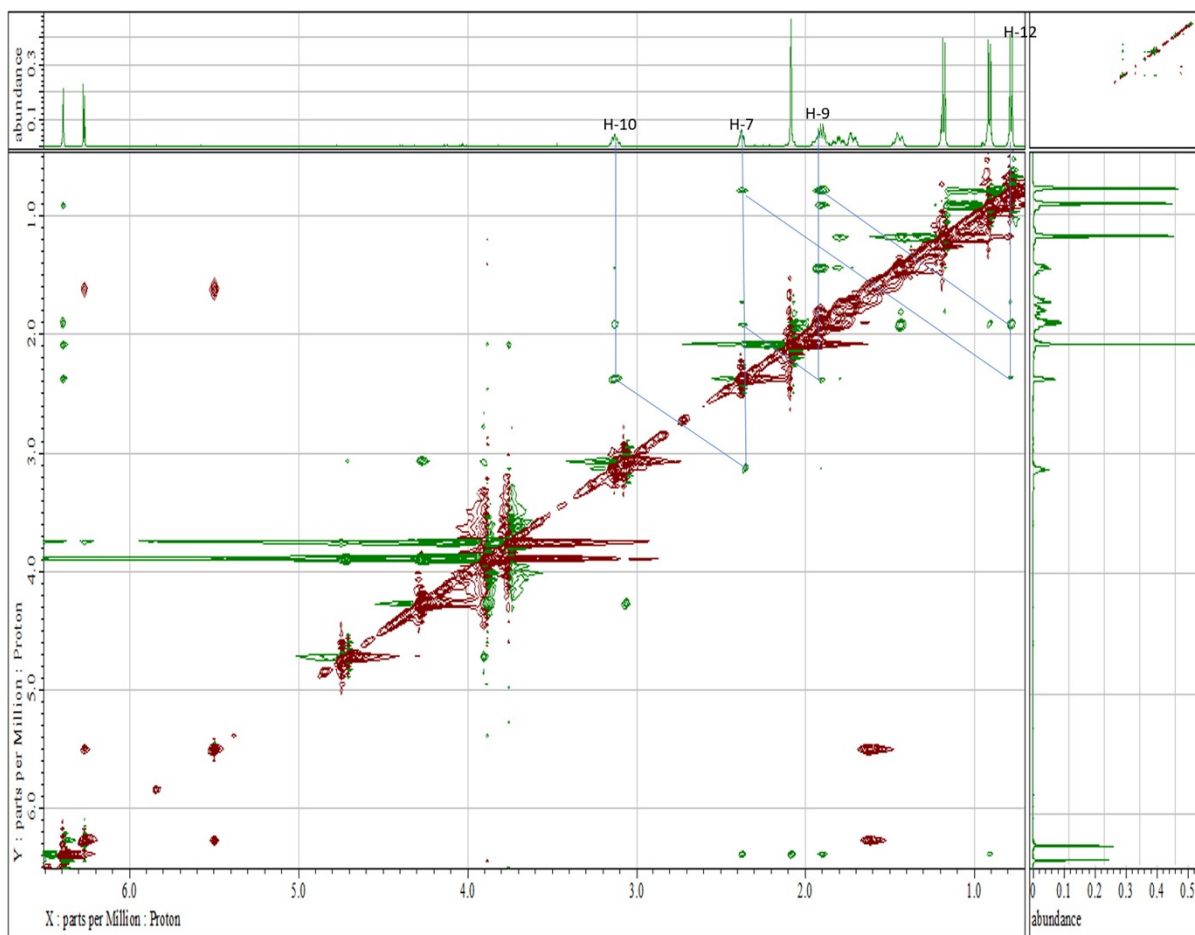

Figure S29.  $^1\text{H}$ - $^1\text{H}$  NOESY of **3**

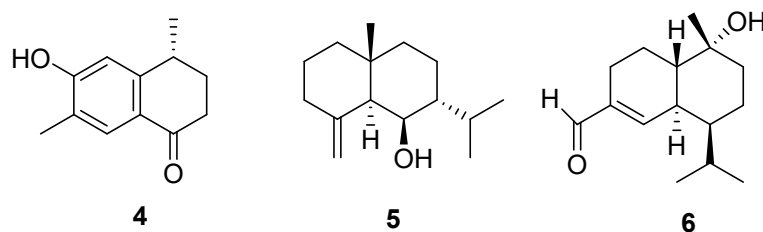

Figure S30. Chemical structure of known compounds (**4-6**).

## Computational section

- For compound 1

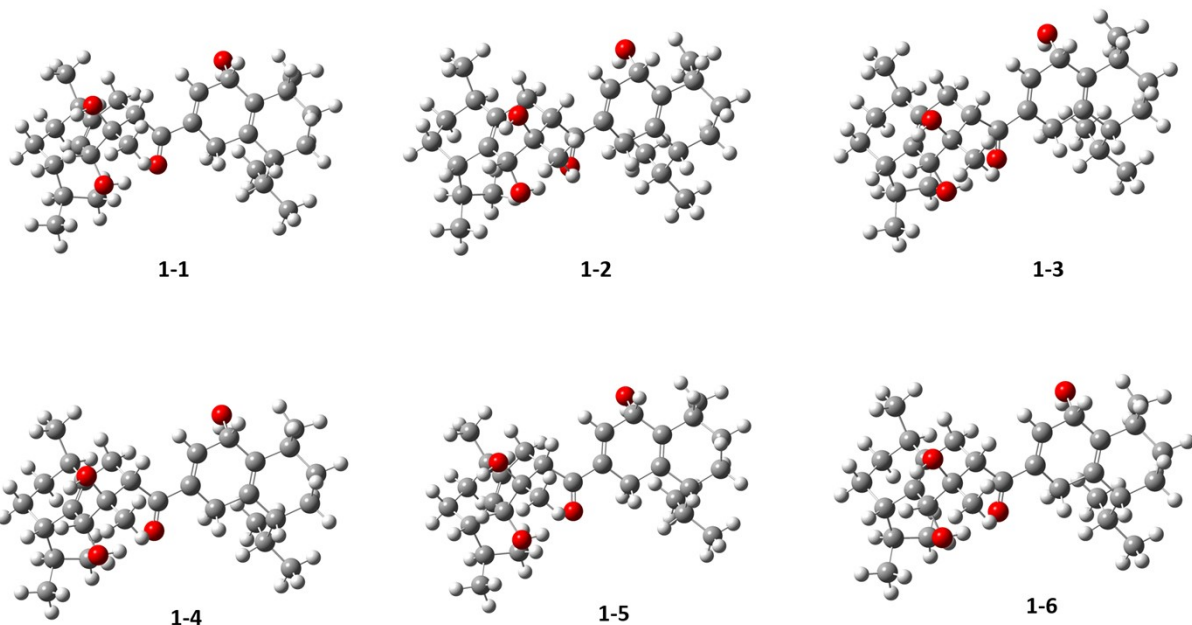

Table S1. Gibbs free energies and equilibrium populations of low-energy conformer of 1

| Conformer | G HF<br>hartree | $\Delta G$<br>hartree | $\Delta G$<br>kJ/mol | $\Delta G$<br>kcal/mol | $(-\Delta G/RT)$ | $e(-\Delta G/RT)$ | Mole<br>fraction | Population% |
|-----------|-----------------|-----------------------|----------------------|------------------------|------------------|-------------------|------------------|-------------|
| 1-1       | -1471.843661    | 0                     | 0                    | 0                      | 0                | 1                 | 0.26425467       | 26.42546697 |
| 1-2       | -1471.843504    | -0.000157             | 0.4122035            | 0.09851901             | -0.16628102      | 0.846808233       | 0.22377303       | 22.37730299 |
| 1-3       | -1471.843422    | -0.000239             | 1.2051046            | 0.28802691             | -0.48613367      | 0.614999592       | 0.162516514      | 16.25165141 |
| 1-4       | -1471.843202    | -0.000459             | 1.2051046            | 0.28802691             | -0.48613367      | 0.614999592       | 0.162516514      | 16.25165141 |
| 1-5       | -1471.843021    | -0.00064              | 1.6803201            | 0.40160615             | -0.67783345      | 0.507715795       | 0.13416627       | 13.41662696 |
| 1-6       | -1471.84214     | -0.001521             | 3.9933858            | 0.95444211             | -1.61091355      | 0.19970509        | 0.052773003      | 5.277300268 |
| SUM       |                 |                       |                      |                        |                  | 3.784228302       | 1                | 100         |

Table S2. Cartesian coordinates for the low-energy reoptimized of compound 1 in the gas phase (Å) at B3LYP/6-31G (d,p) level.

| Center Number | Atomic Number | Atomic Type | Conformer 1-1 | Coordinates (Angstroms) |           |           | Conformer 1-2 | Coordinates (Angstroms) |             |             |
|---------------|---------------|-------------|---------------|-------------------------|-----------|-----------|---------------|-------------------------|-------------|-------------|
|               |               |             |               | X                       | Y         | Z         |               | X                       | Y           | Z           |
| 1             | 1             | 0           |               | 2.243                   | -0.450353 | -2.868292 |               | -1.8989082              | -1.24999286 | -2.88896473 |
| 2             | 6             | 0           |               | 3.1821                  | -0.756876 | -2.383076 |               | -4.5583963              | -0.67011604 | -2.19396718 |
| 3             | 6             | 0           |               | 4.2896                  | 0.232113  | -2.803588 |               | 4.7071827               | -0.71132536 | -1.94845774 |
| 4             | 1             | 0           |               | 4.7017                  | -0.074149 | -3.772165 |               | 6.8880669               | -0.38815945 | -1.81523832 |
| 5             | 1             | 0           |               | 3.8648                  | 1.230111  | -2.956174 |               | 6.8542321               | 0.4048649   | -0.21213239 |
| 6             | 6             | 0           |               | 5.3921                  | 0.311942  | -1.7469   |               | 6.7686251               | 0.12934888  | -2.61643375 |
| 7             | 1             | 0           |               | 5.8337                  | -0.681858 | -1.596818 |               | -5.4256461              | -0.32955989 | -0.71445481 |
| 8             | 1             | 0           |               | 6.2026                  | 0.968862  | -2.084558 |               | -0.1806082              | 0.53175741  | -2.31189543 |
| 9             | 6             | 0           |               | 4.8209                  | 0.824018  | -0.410644 |               | -1.7842561              | 0.27393248  | -2.22997613 |
| 10            | 1             | 0           |               | 5.606                   | 0.694008  | 0.346857  |               | -3.9111416              | 0.44810246  | 1.10635083  |
| 11            | 6             | 0           |               | 3.6576                  | -0.072414 | 0.017083  |               | -2.8569615              | -1.76318264 | 1.25166907  |
| 12            | 6             | 0           |               | 2.9248                  | -0.769679 | -0.87515  |               | -4.4526745              | -1.22517828 | -0.13335763 |
| 13            | 6             | 0           |               | 1.8088                  | -1.707536 | -0.460915 |               | -6.4845174              | -0.96304644 | -0.35884087 |
| 14            | 1             | 0           |               | 2.1576                  | -2.741461 | -0.546836 |               | -2.5118408              | -1.55626237 | -0.08960165 |
| 15            | 1             | 0           |               | 0.9735                  | -1.613625 | -1.165663 |               | -4.5374639              | -0.42368105 | -0.67980168 |
| 16            | 6             | 0           |               | 1.2994                  | -1.52533  | 0.991353  |               | -1.9975054              | -1.8691082  | 0.66868029  |
| 17            | 1             | 0           |               | 0.8086                  | -2.457179 | 1.284342  |               | -5.6428102              | -0.64324786 | 0.94650899  |
| 18            | 6             | 0           |               | 2.5127                  | -1.380758 | 1.940236  |               | -4.0888133              | -1.12275928 | 1.06136642  |
| 19            | 6             | 0           |               | 3.4628                  | -0.222308 | 1.524094  |               | -0.8441488              | -0.72337246 | 0.13859747  |

|    |   |   |  |         |           |           |  |            |             |             |
|----|---|---|--|---------|-----------|-----------|--|------------|-------------|-------------|
| 20 | 1 | 0 |  | 4.4448  | -0.482245 | 1.947325  |  | -6.9259156 | -1.98682857 | 1.41463978  |
| 21 | 6 | 0 |  | 3.5043  | -2.176089 | -2.908851 |  | -6.3812287 | -0.81080051 | -1.93218767 |
| 22 | 1 | 0 |  | 2.7099  | -2.894001 | -2.689685 |  | -0.4106838 | -0.01877652 | -1.54914621 |
| 23 | 1 | 0 |  | 4.4319  | -2.557914 | -2.468052 |  | 0.114066   | -1.50068164 | -2.22663809 |
| 24 | 1 | 0 |  | 3.6333  | -2.1503   | -3.995702 |  | 5.0186115  | -0.24535411 | -1.49854111 |
| 25 | 6 | 0 |  | 4.5406  | 2.379488  | -0.482298 |  | 3.3884682  | 0.00666487  | -3.99481825 |
| 26 | 1 | 0 |  | 5.0769  | 2.732734  | -1.374619 |  | 0.484988   | 2.8406353   | -1.19500433 |
| 27 | 6 | 0 |  | 3.0706  | 2.786627  | -0.66678  |  | 1.3977071  | 1.61107599  | -3.4803525  |
| 28 | 1 | 0 |  | 2.4792  | 2.542978  | 0.218016  |  | 3.3136543  | 2.83264483  | 2.24004448  |
| 29 | 1 | 0 |  | 2.6037  | 2.291475  | -1.522716 |  | 6.6173583  | 2.15462406  | -1.39084998 |
| 30 | 1 | 0 |  | 3.0022  | 3.868446  | -0.830706 |  | 2.0281648  | 1.86927185  | -1.49535734 |
| 31 | 6 | 0 |  | 5.1522  | 3.119352  | 0.718402  |  | 0.6936796  | 2.68677322  | 1.56559489  |
| 32 | 1 | 0 |  | 6.2276  | 2.921802  | 0.798326  |  | 1.6944159  | 0.08701655  | 1.37727624  |
| 33 | 1 | 0 |  | 4.6733  | 2.797236  | 1.646789  |  | 0.5379775  | 2.05816562  | 0.9045103   |
| 34 | 1 | 0 |  | 5.0208  | 4.203329  | 0.61841   |  | 6.7883864  | 4.33842433  | 1.6608979   |
| 35 | 8 | 0 |  | 3.121   | 1.009312  | 2.162876  |  | 3.0775943  | 1.17793085  | 1.34174063  |
| 36 | 1 | 0 |  | 2.1906  | 1.169422  | 1.908882  |  | 0.9471888  | 3.33612695  | 0.08796642  |
| 37 | 6 | 0 |  | -3.0092 | -2.224844 | -0.072261 |  | -6.2681807 | -0.40883899 | 0.85474393  |
| 38 | 1 | 0 |  | -3.3954 | -3.065184 | 0.520608  |  | -6.7661075 | -1.25434599 | 1.07476254  |
| 39 | 6 | 0 |  | -1.6033 | -1.93598  | 0.365453  |  | -5.8545151 | -0.82412947 | 0.93817087  |
| 40 | 1 | 0 |  | -0.9447 | -2.798546 | 0.366228  |  | -0.9995261 | -0.52473352 | 1.70143779  |
| 41 | 6 | 0 |  | -1.1585 | -0.706259 | 0.67213   |  | -6.9189294 | -2.48734639 | 0.18883822  |
| 42 | 6 | 0 |  | -2.0834 | 0.481035  | 0.643604  |  | -5.149826  | 2.15231262  | -0.47854012 |
| 43 | 1 | 0 |  | -2.0121 | 1.012715  | 1.602798  |  | -0.4400818 | 1.41196283  | -0.10131289 |
| 44 | 1 | 0 |  | -1.6867 | 1.201973  | -0.083481 |  | -2.5984876 | 1.23401897  | -0.33534644 |
| 45 | 6 | 0 |  | -3.5375 | 0.1821    | 0.352829  |  | -2.3731954 | 1.25421208  | -0.70478128 |
| 46 | 6 | 0 |  | -3.9676 | -1.059626 | 0.048325  |  | -0.5201117 | -0.80015537 | -0.1656459  |
| 47 | 6 | 0 |  | -5.4424 | -1.407835 | -0.116705 |  | -3.8702623 | -0.12659367 | -0.16521137 |
| 48 | 1 | 0 |  | -5.5871 | -2.395395 | 0.345735  |  | -3.5784425 | -1.8558185  | -0.78778872 |
| 49 | 6 | 0 |  | -6.3079 | -0.395924 | 0.651821  |  | -3.9915177 | -1.8475366  | -0.56783917 |
| 50 | 1 | 0 |  | -6.1464 | -0.529895 | 1.72957   |  | -2.4272922 | -1.1918549  | -1.38116424 |
| 51 | 1 | 0 |  | -7.3703 | -0.591649 | 0.462883  |  | -4.9510808 | -1.51566709 | -1.50006902 |
| 52 | 6 | 0 |  | -5.954  | 1.03821   | 0.258244  |  | -2.4785641 | 0.95477587  | -1.01497017 |
| 53 | 1 | 0 |  | -6.5967 | 1.743856  | 0.79441   |  | -3.6776111 | 2.05762494  | -0.72219312 |
| 54 | 1 | 0 |  | -6.1685 | 1.180308  | -0.806847 |  | -0.1234053 | 2.01972651  | -0.92480357 |
| 55 | 6 | 0 |  | -4.4775 | 1.372814  | 0.549497  |  | -3.601072  | 0.41865717  | 0.35817226  |
| 56 | 1 | 0 |  | -4.4044 | 1.620291  | 1.622336  |  | -4.4888972 | 1.24249732  | 1.52690378  |
| 57 | 6 | 0 |  | -3.9999 | 2.658248  | -0.200072 |  | -1.5764943 | 1.99818837  | 0.48744261  |
| 58 | 1 | 0 |  | -2.9946 | 2.888462  | 0.17344   |  | -1.896218  | 1.38570062  | 0.72862143  |
| 59 | 6 | 0 |  | -3.8897 | 2.474459  | -1.721935 |  | -3.3977436 | 1.51532138  | -1.78002176 |
| 60 | 1 | 0 |  | -3.255  | 1.62176   | -1.984308 |  | -4.4298246 | 1.93186949  | -1.60704764 |
| 61 | 1 | 0 |  | -3.4571 | 3.368528  | -2.183434 |  | -1.3994545 | 0.19162183  | -0.02548184 |
| 62 | 1 | 0 |  | -4.8697 | 2.31262   | -2.18364  |  | -1.1380514 | 1.10278795  | -0.32865728 |
| 63 | 6 | 0 |  | -4.8761 | 3.873237  | 0.142987  |  | -2.2066933 | 3.34353661  | 0.56903302  |
| 64 | 1 | 0 |  | -5.8874 | 3.775374  | -0.265458 |  | -3.4640818 | 4.65263946  | -0.55198775 |
| 65 | 1 | 0 |  | -4.4414 | 4.787408  | -0.275198 |  | -3.9022719 | 4.20516323  | -0.38763857 |
| 66 | 1 | 0 |  | -4.9633 | 4.009942  | 1.226784  |  | -0.9232317 | 1.5415053   | 0.84429724  |
| 67 | 6 | 0 |  | -5.8796 | -1.547054 | -1.591292 |  | -0.0472064 | -0.65384926 | -1.04804231 |
| 68 | 1 | 0 |  | -6.9327 | -1.845042 | -1.648782 |  | -3.589284  | -1.99807742 | -2.1020368  |
| 69 | 1 | 0 |  | -5.2761 | -2.300278 | -2.101123 |  | -1.6922053 | -0.67981928 | -2.36453941 |
| 70 | 1 | 0 |  | -5.7657 | -0.60371  | -2.134912 |  | -2.6709299 | -2.30304371 | -1.93174705 |
| 71 | 8 | 0 |  | -2.957  | -2.771356 | -1.414583 |  | -0.2464959 | -1.54386641 | -1.24718607 |
| 72 | 1 | 0 |  | -2.6892 | -2.043615 | -1.995684 |  | -4.159719  | -0.38125744 | -1.56149507 |
| 73 | 6 | 0 |  | 0.2559  | -0.415639 | 1.049808  |  | 4.8044929  | -1.2162803  | 3.15409111  |
| 74 | 8 | 0 |  | 0.5379  | 0.746003  | 1.363377  |  | 5.6774669  | 0.51589809  | 3.19195074  |
| 75 | 8 | 0 |  | 3.2116  | -2.627604 | 1.742982  |  | 1.3625117  | -1.6091743  | 2.88220407  |
| 76 | 1 | 0 |  | 3.9582  | -2.638454 | 2.358401  |  | 0.3674191  | -0.0687472  | 1.37285288  |
| 77 | 6 | 0 |  | 2.0949  | -1.278136 | 3.410521  |  | 5.3743726  | -1.02273695 | 3.75710982  |
| 78 | 1 | 0 |  | 1.5208  | -2.168198 | 3.685481  |  | 6.827391   | -0.53551915 | 0.08459413  |
| 79 | 1 | 0 |  | 1.4934  | -0.391179 | 3.612046  |  | 5.0641513  | -0.34905722 | 1.23173899  |
| 80 | 1 | 0 |  | 2.9815  | -1.228399 | 4.052463  |  | 9.4737836  | -2.24003941 | 3.3042033   |

| Center Number | Atomic Number | Atomic Type | Conformer 1-3 | Coordinates (Angstroms) |            |            | Conformer 1-4 | Coordinates (Angstroms) |             |             |
|---------------|---------------|-------------|---------------|-------------------------|------------|------------|---------------|-------------------------|-------------|-------------|
|               |               |             |               | X                       | Y          | Z          |               | X                       | Y           | Z           |
| 1             | 1             | 0           |               | 2.6877936               | -1.0592333 | -3.3740814 |               | -2.5488815              | -0.63659803 | -2.11919384 |
| 2             | 6             | 0           |               | 1.0070542               | -0.6470359 | -3.3811396 |               | -2.7199686              | -0.16627601 | -0.58990714 |
| 3             | 6             | 0           |               | 4.1424328               | -0.2911403 | -1.8588457 |               | -1.6395269              | 1.24022795  | -3.3272539  |
| 4             | 1             | 0           |               | 1.4300412               | -0.1204547 | -0.0565557 |               | -4.605148               | -0.05702905 | -1.92965599 |
| 5             | 1             | 0           |               | 3.0330278               | -0.0428246 | -4.1439086 |               | 5.1300668               | 1.98074786  | -3.54146881 |
| 6             | 6             | 0           |               | 2.7252502               | -1.2156772 | -4.851016  |               | 1.5110103               | 0.79421018  | -2.80173423 |
| 7             | 1             | 0           |               | 3.2145557               | -1.9228802 | -2.0093215 |               | 0.9134834               | -0.35276942 | -1.29679299 |



|    |   |   |  |            |            |            |  |            |             |             |
|----|---|---|--|------------|------------|------------|--|------------|-------------|-------------|
| 8  | 1 | 0 |  | 1.4115949  | -1.6942549 | -0.2518817 |  | 0.6413906  | 0.60546226  | -2.91039389 |
| 9  | 6 | 0 |  | 1.5102234  | -0.1850531 | -1.4442399 |  | 1.9497415  | 1.03235326  | -3.40280815 |
| 10 | 1 | 0 |  | -3.561122  | -0.6187356 | 0.9813144  |  | 1.3930704  | 1.15955643  | 1.93724351  |
| 11 | 6 | 0 |  | -1.1311535 | -1.9861346 | 1.0607955  |  | 4.4787359  | -0.99875694 | 1.13962093  |
| 12 | 6 | 0 |  | -1.6166998 | -1.4887875 | -4.6470168 |  | 1.5913759  | -1.00139258 | -1.77488058 |
| 13 | 6 | 0 |  | -0.2550316 | -0.9875308 | -2.3754856 |  | 2.129382   | -0.13287451 | -2.01228091 |
| 14 | 1 | 0 |  | -0.1783172 | -1.8753155 | -3.2790608 |  | 1.21306    | -1.45590241 | -1.3714064  |
| 15 | 1 | 0 |  | -4.8754468 | -1.2801002 | -2.1765434 |  | 3.6655939  | -1.94857825 | -1.93850989 |
| 16 | 6 | 0 |  | -1.872     | -0.2566732 | 0.9566637  |  | 2.2640329  | -1.19931739 | -3.06983875 |
| 17 | 1 | 0 |  | 0.0721831  | -2.754349  | 2.134577   |  | 4.5291534  | -1.17106422 | 3.30208202  |
| 18 | 6 | 0 |  | 0.5989836  | -1.4775503 | 3.8100867  |  | 3.7091475  | -1.09270659 | 3.11988036  |
| 19 | 6 | 0 |  | 0.4064947  | -2.3414749 | 2.6263367  |  | 0.4811026  | -1.76692861 | 2.80008592  |
| 20 | 1 | 0 |  | 1.543079   | -1.0591476 | 3.5678019  |  | 3.6579913  | -1.05699292 | 1.84286861  |
| 21 | 6 | 0 |  | 1.6723684  | -0.7035432 | -1.3824061 |  | -1.5404863 | -0.77985655 | 0.06933701  |
| 22 | 1 | 0 |  | 1.1758195  | -1.6249067 | -4.6753298 |  | -3.5972762 | -2.01227581 | -2.29943133 |
| 23 | 1 | 0 |  | 2.8157481  | -2.0000038 | -4.666707  |  | -1.9516785 | -0.39652384 | -1.75885652 |
| 24 | 1 | 0 |  | 3.6623387  | -1.5244444 | -3.7935897 |  | -3.0641725 | -1.98003091 | -0.3054036  |
| 25 | 6 | 0 |  | 0.3924331  | 2.7739738  | -4.5187211 |  | -0.647246  | 1.87167205  | -0.1606125  |
| 26 | 1 | 0 |  | 0.2276335  | 0.0154903  | -4.348822  |  | 1.5236878  | 1.25829612  | -2.32409604 |
| 27 | 6 | 0 |  | 0.3526735  | 1.4351691  | -2.6533242 |  | 1.1002967  | 2.56098888  | -0.39373758 |
| 28 | 1 | 0 |  | 2.0554971  | 0.4067906  | 3.3650616  |  | 4.0511239  | 0.42493266  | 0.16291972  |
| 29 | 1 | 0 |  | 4.7832289  | 1.0159039  | -0.8683408 |  | 0.3010681  | 1.32955978  | -0.16617191 |
| 30 | 1 | 0 |  | 4.6688169  | 1.9928884  | -2.975454  |  | 0.2594605  | 2.18183509  | -2.32577985 |
| 31 | 6 | 0 |  | 3.1000663  | 0.5333744  | 1.5223197  |  | 0.2043493  | 0.0828071   | 2.19103247  |
| 32 | 1 | 0 |  | 3.5965541  | 1.0870856  | 4.6220551  |  | 5.4692075  | -0.13370135 | 3.169449    |
| 33 | 1 | 0 |  | 1.3584089  | 0.7808592  | 0.316641   |  | 2.331018   | 0.15254989  | 0.49845607  |
| 34 | 1 | 0 |  | 2.3448821  | 2.4642722  | 3.4646947  |  | 4.6870481  | 1.00685787  | 3.96131718  |
| 35 | 8 | 0 |  | 1.3770196  | 0.6242238  | 2.5224567  |  | 4.6729213  | -0.4151176  | 0.65081439  |
| 36 | 1 | 0 |  | 3.3699912  | 2.7409996  | 3.8846074  |  | 3.0830569  | -2.05176029 | 0.21894821  |
| 37 | 6 | 0 |  | 2.3653333  | -3.9338144 | -2.2112628 |  | 2.7518395  | -0.13370135 | -0.77649329 |
| 38 | 1 | 0 |  | -0.1625532 | -1.0194841 | 3.9167644  |  | -3.6094297 | -1.52082056 | 3.5290171   |
| 39 | 6 | 0 |  | -2.163936  | -3.3604555 | 1.1494319  |  | -3.3803363 | -2.12651122 | -1.891592   |
| 40 | 1 | 0 |  | -1.5068103 | -2.0205907 | 1.4531949  |  | -0.7833649 | -1.57172163 | -0.94892238 |
| 41 | 6 | 0 |  | -2.690061  | -1.2344275 | 2.0442556  |  | -3.5132636 | -0.35602928 | -0.5038114  |
| 42 | 6 | 0 |  | -2.2690333 | 1.4158586  | 3.403929   |  | -2.832914  | 2.23063953  | -1.6269453  |
| 43 | 1 | 0 |  | -2.5301097 | 0.0321544  | 1.2316792  |  | -0.4296732 | 0.15314137  | -3.92546317 |
| 44 | 1 | 0 |  | -2.5731685 | 1.0253621  | -1.4344138 |  | -3.9952586 | 0.27745337  | -0.56298394 |
| 45 | 6 | 0 |  | -0.6155911 | 1.0183046  | 4.5160076  |  | -0.4036298 | -2.13568925 | -2.88317272 |
| 46 | 6 | 0 |  | -0.8194809 | -0.9541673 | 2.576569   |  | -4.0637153 | -1.12804313 | -0.37769767 |
| 47 | 6 | 0 |  | -0.0012974 | -0.4682194 | -4.8236308 |  | -0.530713  | -2.78313781 | -0.76627126 |
| 48 | 1 | 0 |  | -2.4193088 | -0.7956763 | 0.9557495  |  | -3.3239334 | -0.08565893 | -1.16983534 |
| 49 | 6 | 0 |  | -6.9106966 | -0.1578849 | 4.6998433  |  | -1.0795583 | -2.06189846 | -3.51051053 |
| 50 | 1 | 0 |  | -2.9672855 | -0.4293482 | 0.2741651  |  | -1.0211765 | -1.02081429 | -0.80654721 |
| 51 | 1 | 0 |  | -4.0087897 | -1.4098627 | 1.0918841  |  | -4.5796419 | -0.53014159 | -1.04575528 |
| 52 | 6 | 0 |  | -4.7851004 | 0.0313479  | 4.6753671  |  | -3.6987026 | 2.94824921  | -3.67855568 |
| 53 | 1 | 0 |  | -1.0553979 | 1.1912244  | 4.7903881  |  | -4.5433002 | 2.52336682  | -2.98247917 |
| 54 | 1 | 0 |  | -0.0678328 | 0.8539029  | -4.8773945 |  | -0.9516216 | 1.22362291  | -0.99884517 |
| 55 | 6 | 0 |  | -1.422062  | 1.8615152  | -0.9477818 |  | -0.4518133 | 0.98353035  | -3.62879611 |
| 56 | 1 | 0 |  | -6.8424427 | 1.6007491  | -3.2475723 |  | -4.3739229 | 1.59688993  | -3.89283415 |
| 57 | 6 | 0 |  | -3.8827961 | 1.5690434  | -2.5657593 |  | -3.4674908 | 0.71781566  | -0.55493865 |
| 58 | 1 | 0 |  | -3.4353789 | 1.0374124  | -3.6091718 |  | -1.5255822 | 1.48936933  | 0.89814846  |
| 59 | 6 | 0 |  | -3.6785176 | 0.7256227  | -3.1475884 |  | -3.4946726 | 0.53094214  | -3.78524128 |
| 60 | 1 | 0 |  | -5.8884763 | 0.7886187  | -1.6575442 |  | -0.660039  | 2.48012663  | -3.86376384 |
| 61 | 1 | 0 |  | -3.258942  | 3.7044474  | -4.383903  |  | -4.0307811 | 3.98037199  | -2.9397691  |
| 62 | 1 | 0 |  | -5.6330164 | 1.549222   | -3.1636695 |  | -2.0383148 | 1.7586414   | -0.78810503 |
| 63 | 6 | 0 |  | -1.8429395 | 3.8871653  | 2.0209839  |  | -4.3873028 | 3.16243123  | 0.46450401  |
| 64 | 1 | 0 |  | -0.49372   | 3.3337095  | -2.4872021 |  | -2.9422125 | 0.21538234  | 2.57115067  |
| 65 | 1 | 0 |  | -4.9723421 | 1.3113228  | -2.8396389 |  | -4.9102097 | 3.57175427  | 2.22133534  |
| 66 | 1 | 0 |  | -5.8921984 | 4.2222495  | -1.4349743 |  | -3.0664128 | 3.57493291  | -0.46565983 |
| 67 | 6 | 0 |  | -3.2654852 | -1.7401056 | -3.9527081 |  | -3.2999233 | -1.86764269 | -0.1281905  |
| 68 | 1 | 0 |  | -2.1296038 | -3.3836845 | -2.4710818 |  | -3.1662212 | -0.39258956 | -0.23984336 |
| 69 | 1 | 0 |  | -6.6017474 | -1.5590584 | -4.5069534 |  | -3.9693863 | -0.04781516 | -3.84053741 |
| 70 | 1 | 0 |  | -0.4028579 | -1.7327619 | -1.9647891 |  | -4.6432083 | -2.31981783 | -2.35603225 |
| 71 | 8 | 0 |  | -5.8014023 | -2.1133917 | -2.6460585 |  | -3.7145703 | -1.23060729 | -1.66654225 |
| 72 | 1 | 0 |  | -4.2789509 | -3.7605479 | -2.1420953 |  | -3.4682875 | -1.96624052 | -2.10290358 |
| 73 | 6 | 0 |  | 0.5348347  | -3.6969453 | -0.1499462 |  | 0.7317112  | -2.1911063  | 1.34743976  |
| 74 | 8 | 0 |  | 0.2406334  | -3.749506  | 2.2052428  |  | 4.2906934  | 1.16373187  | -3.42985065 |
| 75 | 8 | 0 |  | 1.7338436  | -2.772887  | 3.9223571  |  | 2.8127209  | -1.99352909 | -3.9769751  |
| 76 | 1 | 0 |  | 2.4843488  | -0.5802137 | -2.4663991 |  | 1.194981   | -1.84399095 | -2.40502818 |
| 77 | 6 | 0 |  | 2.982994   | -2.2150046 | -2.8663215 |  | 1.0216172  | -0.59452951 | -3.35684451 |
| 78 | 1 | 0 |  | 2.1933771  | -2.3342689 | -4.2003915 |  | 0.203229   | -2.3912     | -0.27784921 |

|    |   |   |  |           |            |            |  |           |             |             |
|----|---|---|--|-----------|------------|------------|--|-----------|-------------|-------------|
| 79 | 1 | 0 |  | 2.2068831 | -0.3346067 | -4.2331215 |  | 4.9420787 | -2.44716977 | -2.41670227 |
| 80 | 1 | 0 |  | 2.2322536 | -2.3641917 | -0.7913545 |  | 2.7931219 | -1.81773276 | -3.79467177 |

| Center Number | Atomic Number | Atomic Type | Conformer 1-5 | Coordinates (Angstroms) |           |           | Conformer 1-6 | Coordinates (Angstroms) |           |           |
|---------------|---------------|-------------|---------------|-------------------------|-----------|-----------|---------------|-------------------------|-----------|-----------|
|               |               |             |               | X                       | Y         | Z         |               | X                       | Y         | Z         |
| 1             | 1             | 0           |               | -1.475140               | 1.91962   | 0.295949  |               | -1.476225               | 2.79104   | 0.265069  |
| 2             | 6             | 0           |               | -3.962206               | -0.188571 | 0.089733  |               | -3.968106               | 0.191544  | -0.103367 |
| 3             | 6             | 0           |               | -3.750759               | -1.488479 | -0.208916 |               | -3.759197               | 1.495901  | 0.176939  |
| 4             | 1             | 0           |               | -1.292266               | -0.996245 | -0.621762 |               | -1.292119               | 1.015536  | 0.562893  |
| 5             | 1             | 0           |               | -0.309755               | -1.378788 | -0.883949 |               | -0.30971                | 1.401466  | 0.820225  |
| 6             | 6             | 0           |               | -4.775463               | -2.588599 | 0.047026  |               | -4.803564               | 2.582758  | -0.057735 |
| 7             | 1             | 0           |               | -4.224111               | -3.417916 | 0.515776  |               | -4.272812               | 3.424479  | -0.527827 |
| 8             | 1             | 0           |               | -5.833076               | -2.099172 | 1.04739   |               | -5.86673                | 2.081796  | -1.046649 |
| 9             | 6             | 0           |               | -5.381805               | -2.00792  | 2.044369  |               | -5.424053               | 1.990456  | -2.047462 |
| 10            | 1             | 0           |               | -6.640934               | -2.836051 | 1.129732  |               | -6.681223               | 2.811965  | -1.123808 |
| 11            | 6             | 0           |               | -6.385751               | -0.745464 | 0.609485  |               | -6.405124               | 0.725955  | -0.597428 |
| 12            | 6             | 0           |               | -7.217869               | -0.444461 | 1.253253  |               | -7.238075               | 0.413435  | -1.234753 |
| 13            | 6             | 0           |               | -6.796771               | -0.844387 | -0.401201 |               | -6.812293               | 0.828508  | 0.414147  |
| 14            | 1             | 0           |               | -5.298981               | 0.345642  | 0.628689  |               | -5.309909               | -0.356831 | -0.615439 |
| 15            | 1             | 0           |               | -5.119851               | 0.597469  | 1.687876  |               | -5.141363               | -0.619141 | -1.673834 |
| 16            | 6             | 0           |               | -5.415732               | -3.163845 | -1.234942 |               | -5.437405               | 3.13774   | 1.236528  |
| 17            | 1             | 0           |               | -4.651263               | -3.530539 | -1.921394 |               | -4.670324               | 3.51885   | 1.911811  |
| 18            | 6             | 0           |               | -6.089137               | -3.990353 | -0.980829 |               | -6.133344               | 3.949709  | 0.996286  |
| 19            | 6             | 0           |               | -5.998097               | -2.40503  | -1.767767 |               | -5.994444               | 2.364034  | 1.774825  |
| 20            | 1             | 0           |               | -5.759631               | 1.686889  | -0.069656 |               | -5.750638               | -1.694639 | 0.10243   |
| 21            | 6             | 0           |               | -5.346609               | 1.688312  | -1.087879 |               | -5.313374               | -1.688821 | 1.110397  |
| 22            | 1             | 0           |               | -7.286819               | 1.83512   | -0.213603 |               | -7.273189               | -1.847727 | 0.284704  |
| 23            | 1             | 0           |               | -7.514199               | 2.789775  | -0.699743 |               | -7.484663               | -2.800714 | 0.781204  |
| 24            | 1             | 0           |               | -7.738076               | 1.045884  | -0.818906 |               | -7.71227                | -1.057213 | 0.897308  |
| 25            | 6             | 0           |               | -7.784676               | 1.840101  | 0.762829  |               | -7.795384               | -1.859555 | -0.678823 |
| 26            | 1             | 0           |               | -5.243335               | 2.937764  | 0.66796   |               | -5.246698               | -2.947429 | -0.640322 |
| 27            | 6             | 0           |               | -5.668328               | 2.981149  | 1.67832   |               | -5.699173               | -3.000649 | -1.638209 |
| 28            | 1             | 0           |               | -4.157517               | 2.969876  | 0.766278  |               | -4.163716               | -2.971932 | -0.76883  |
| 29            | 1             | 0           |               | -5.552171               | 3.847676  | 0.141925  |               | -5.534108               | -3.855904 | -0.099852 |
| 30            | 1             | 0           |               | -0.36783                | 1.290453  | -0.296228 |               | -0.370506               | -1.279247 | -0.291799 |
| 31            | 6             | 0           |               | -0.65614                | 2.490197  | -0.350163 |               | -0.66128                | -2.477356 | 0.365079  |
| 32            | 1             | 0           |               | -2.422673               | -1.974384 | -0.750986 |               | -2.416493               | 2.003823  | 0.660451  |
| 33            | 1             | 0           |               | -2.150383               | -2.90121  | -0.223588 |               | -2.153587               | 2.895612  | 0.070434  |
| 34            | 1             | 0           |               | -2.847187               | 0.829779  | 0.006065  |               | -2.847369               | -0.821336 | -0.031474 |
| 35            | 8             | 0           |               | -3.079411               | 1.605721  | -0.734274 |               | -3.071459               | -1.600779 | 0.707289  |
| 36            | 1             | 0           |               | -2.800575               | 1.374937  | 0.95855   |               | -2.804649               | -1.363317 | -0.986372 |
| 37            | 6             | 0           |               | -2.5805                 | -2.286891 | -2.162131 |               | -2.53684                | 2.403811  | 2.052118  |
| 38            | 1             | 0           |               | -1.920138               | -2.957964 | -2.386678 |               | -1.874245               | 3.089895  | 2.216197  |
| 39            | 6             | 0           |               | 3.86606                 | 0.240033  | 0.117819  |               | 3.868992                | -0.245156 | -0.104227 |
| 40            | 1             | 0           |               | 3.007961                | -0.210725 | 1.063506  |               | 3.020847                | 0.187329  | -1.067289 |
| 41            | 6             | 0           |               | 1.49132                 | 0.028927  | 1.000826  |               | 1.503166                | -0.048237 | -1.014092 |
| 42            | 6             | 0           |               | 1.064141                | -0.975712 | 0.875306  |               | 1.077237                | 0.959709  | -0.913342 |
| 43            | 1             | 0           |               | 1.088076                | 0.833369  | -0.272819 |               | 1.086486                | -0.825386 | 0.27206   |
| 44            | 1             | 0           |               | 1.197502                | 0.144805  | -1.119942 |               | 1.189863                | -0.119853 | 1.105803  |
| 45            | 6             | 0           |               | 2.1023                  | 1.959275  | -0.578112 |               | 2.09541                 | -1.946944 | 0.609492  |
| 46            | 6             | 0           |               | 3.410869                | 1.229898  | -0.945771 |               | 3.401994                | -1.212783 | 0.974685  |
| 47            | 6             | 0           |               | 4.195825                | 1.995299  | -1.059003 |               | 4.184364                | -1.97719  | 1.110291  |
| 48            | 1             | 0           |               | 5.350057                | -0.155534 | 0.040026  |               | 5.35278                 | 0.149823  | -0.020208 |
| 49            | 6             | 0           |               | 5.920701                | 0.783095  | -0.011948 |               | 5.921423                | -0.788277 | 0.056803  |
| 50            | 1             | 0           |               | 5.811057                | -0.878113 | 1.32006   |               | 5.827374                | 0.844682  | -1.310553 |
| 51            | 1             | 0           |               | 6.00285                 | -0.129838 | 2.096644  |               | 6.02536                 | 0.079844  | -2.069249 |
| 52            | 6             | 0           |               | 6.766897                | -1.380061 | 1.156218  |               | 6.782565                | 1.348309  | -1.148001 |
| 53            | 1             | 0           |               | 4.755068                | -1.86306  | 1.825107  |               | 4.778296                | 1.820615  | -1.846576 |
| 54            | 1             | 0           |               | 5.13028                 | -2.42512  | 2.688746  |               | 5.162975                | 2.363366  | -2.718358 |
| 55            | 6             | 0           |               | 4.521331                | -2.596903 | 1.044044  |               | 4.538645                | 2.57148   | -1.083699 |
| 56            | 1             | 0           |               | 3.476157                | -1.104709 | 2.215345  |               | 3.501526                | 1.056596  | -2.2328   |
| 57            | 6             | 0           |               | 2.683213                | -1.840638 | 2.410349  |               | 2.711874                | 1.789768  | -2.450245 |
| 58            | 1             | 0           |               | 5.676631                | -0.929852 | -1.31047  |               | 5.667472                | 0.951686  | 1.31689   |
| 59            | 6             | 0           |               | 4.727408                | -1.284249 | -1.722939 |               | 4.714847                | 1.316236  | 1.71235   |
| 60            | 1             | 0           |               | 6.303265                | 0.022723  | -2.343758 |               | 6.282202                | 0.020056  | 2.376053  |
| 61            | 1             | 0           |               | 6.491705                | -0.498122 | -3.289841 |               | 6.461764                | 0.560282  | 3.31294   |
| 62            | 1             | 0           |               | 5.650475                | 0.870533  | -2.559125 |               | 5.626036                | -0.822239 | 2.602336  |
| 63            | 6             | 0           |               | 7.265243                | 0.406473  | -1.98068  |               | 7.247301                | -0.372246 | 2.030864  |
| 64            | 1             | 0           |               | 6.589539                | -2.159854 | -1.163914 |               | 6.584014                | 2.176865  | 1.153518  |
| 65            | 1             | 0           |               | 7.593299                | -1.888662 | -0.81652  |               | 7.590671                | 1.896749  | 0.821961  |

|    |   |   |  |           |           |           |  |           |           |           |
|----|---|---|--|-----------|-----------|-----------|--|-----------|-----------|-----------|
| 66 | 1 | 0 |  | 6.187674  | -2.912112 | -0.479467 |  | 6.190358  | 2.915085  | 0.449316  |
| 67 | 6 | 0 |  | 6.706067  | -2.639159 | -2.142408 |  | 6.691705  | 2.676575  | 2.122762  |
| 68 | 1 | 0 |  | 0.845609  | 0.569988  | 2.29745   |  | 0.867996  | -0.614512 | -2.305162 |
| 69 | 1 | 0 |  | -0.231382 | 0.700278  | 2.157841  |  | -0.210552 | -0.739489 | -2.172727 |
| 70 | 1 | 0 |  | 0.965104  | -0.141482 | 3.115949  |  | 0.996814  | 0.079514  | -3.137142 |
| 71 | 8 | 0 |  | 1.259878  | 1.52913   | 2.614573  |  | 1.282635  | -1.58103  | -2.598497 |
| 72 | 1 | 0 |  | 3.22724   | 0.564403  | -2.205414 |  | 3.208157  | -0.522097 | 2.219168  |
| 73 | 6 | 0 |  | 2.735299  | 1.20859   | -2.743416 |  | 2.710179  | -1.154577 | 2.765397  |
| 74 | 8 | 0 |  | 3.713857  | -0.330448 | 3.536749  |  | 3.749862  | 0.25493   | -3.535758 |
| 75 | 8 | 0 |  | 4.474088  | 0.445778  | 3.414563  |  | 4.510127  | -0.517459 | -3.391506 |
| 76 | 1 | 0 |  | 2.814741  | 0.156211  | 3.913106  |  | 2.854214  | -0.240875 | -3.908385 |
| 77 | 6 | 0 |  | 4.063182  | -1.023794 | 4.310046  |  | 4.104174  | 0.93226   | -4.320884 |
| 78 | 1 | 0 |  | 2.330857  | 2.999943  | 0.524567  |  | 2.3323    | -3.010103 | -0.46977  |
| 79 | 1 | 0 |  | 2.992284  | 3.778704  | 0.132672  |  | 2.988354  | -3.782065 | -0.056001 |
| 80 | 1 | 0 |  | 1.388684  | 3.466389  | 0.819208  |  | 1.391973  | -3.48049  | -0.763971 |

- For compound 2

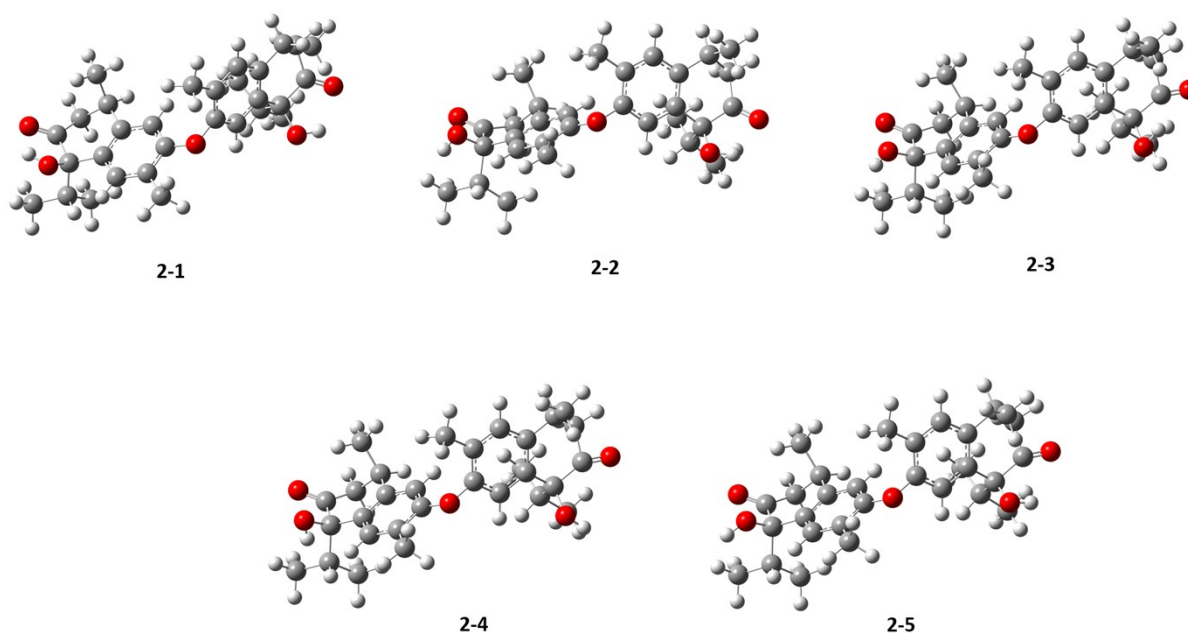

Table S3. Gibbs free energies and equilibrium populations of low-energy conformer of 2

| Conformer | G HF hartree | $\Delta G$ hartree | $\Delta G$ kJ/mol | $\Delta G$ kcal/mol | $(-\Delta G/RT)$ | $e^{(-\Delta G/RT)}$ | Mole fraction | Population% |
|-----------|--------------|--------------------|-------------------|---------------------|------------------|----------------------|---------------|-------------|
| 2-1       | -1542.290499 | 0                  | 0                 | 0                   | 0                | 1                    | 0.404084077   | 40.40840774 |
| 2-2       | -1542.290215 | -0.000284          | 0.7456421         | 0.17821273          | -0.30078859      | 0.740234248          | 0.299116873   | 29.9116873  |
| 2-3       | -1542.290112 | -0.000387          | 1.0160686         | 0.24284622          | -0.40987741      | 0.663731611          | 0.268203376   | 26.82033758 |
| 2-4       | -1542.287532 | -0.002967          | 7.7898591         | 1.86182101          | -3.1423935       | 0.043179325          | 0.017448078   | 1.744807755 |
| 2-5       | -1542.287109 | -0.00339           | 8.9004457         | 2.1272576           | -3.59039908      | 0.027587319          | 0.011147596   | 1.11475962  |
| SUM       |              |                    |                   |                     |                  | 2.474732502          | 1             | 100         |

Table S4. Cartesian coordinates for the low-energy reoptimized of compound 2 in the gas phase ( $\text{\AA}$ ) at B3LYP/6-31G (d,p) level.

| Center Number | Atomic Number | Atomic Type | Conformer 2-1 | Coordinates (Angstroms) |          |           | Conformer 2-2 | Coordinates (Angstroms) |           |          |
|---------------|---------------|-------------|---------------|-------------------------|----------|-----------|---------------|-------------------------|-----------|----------|
|               |               |             |               | X                       | Y        | Z         |               | X                       | Y         | Z        |
| 1             | 1             | 0           |               | 1.113267                | 0.942125 | 0.200815  |               | 3.649870                | 0.794659  | 1.650038 |
| 2             | 6             | 0           |               | 0.322128                | 1.570298 | 0.591433  |               | 3.276088                | -2.480829 | 0.884394 |
| 3             | 6             | 0           |               | -1.663298               | 3.141785 | 1.682127  |               | 3.891001                | -2.369465 | 2.54748  |
| 4             | 6             | 0           |               | 3.25612                 | 2.778093 | -0.046006 |               | 2.566471                | -0.725095 | 1.937732 |
| 5             | 6             | 0           |               | -0.349754               | 1.155879 | 1.737229  |               | 1.620196                | -1.25418  | 2.098059 |

|    |   |   |  |           |           |           |  |           |           |           |
|----|---|---|--|-----------|-----------|-----------|--|-----------|-----------|-----------|
| 6  | 6 | 0 |  | -1.357778 | 1.940522  | 2.319106  |  | 4.771895  | -0.26543  | -0.126679 |
| 7  | 6 | 0 |  | -1.020941 | 3.571787  | 0.511466  |  | 3.424934  | 0.461004  | -0.171299 |
| 8  | 1 | 0 |  | -2.428983 | 3.775837  | 2.118666  |  | 2.394965  | 0.213962  | 0.751181  |
| 9  | 6 | 0 |  | 0.81943   | 3.228431  | -1.256702 |  | 3.221533  | 1.421367  | -1.174479 |
| 10 | 1 | 0 |  | 1.740731  | 3.685706  | -0.867282 |  | 4.029118  | 1.633936  | -1.868717 |
| 11 | 6 | 0 |  | 0.086745  | 4.324504  | -2.070271 |  | 2.027393  | 2.125183  | -1.317693 |
| 12 | 1 | 0 |  | -0.731938 | 3.857761  | -2.627945 |  | 0.999984  | 1.836171  | -0.402121 |
| 13 | 1 | 0 |  | 0.766227  | 4.796084  | -2.784133 |  | 1.183749  | 0.907762  | 0.617549  |
| 14 | 6 | 0 |  | -0.464492 | 5.369971  | -1.148036 |  | 0.379828  | 0.722626  | 1.322888  |
| 15 | 6 | 0 |  | -1.464015 | 4.912905  | -0.081649 |  | 1.828941  | 3.153573  | -2.401555 |
| 16 | 6 | 0 |  | 1.234006  | 2.088296  | -2.200636 |  | 2.707388  | 3.208616  | -3.048797 |
| 17 | 1 | 0 |  | 0.356985  | 1.54259   | -2.564569 |  | 1.651934  | 4.149537  | -1.980594 |
| 18 | 1 | 0 |  | 1.904399  | 1.37461   | -1.715875 |  | 0.957783  | 2.915101  | -3.020815 |
| 19 | 1 | 0 |  | 1.765762  | 2.495865  | -3.065905 |  | 2.889043  | 0.061015  | 3.225043  |
| 20 | 6 | 0 |  | -2.937016 | 4.841773  | -0.651712 |  | 3.838814  | 0.598951  | 3.135205  |
| 21 | 1 | 0 |  | -3.525896 | 4.648752  | 0.253923  |  | 2.961101  | -0.616775 | 4.081869  |
| 22 | 6 | 0 |  | -3.232465 | 3.702788  | -1.637301 |  | 2.107548  | 0.79631   | 3.435825  |
| 23 | 1 | 0 |  | -4.316032 | 3.597272  | -1.752744 |  | 4.993988  | -1.15232  | -1.416867 |
| 24 | 1 | 0 |  | -2.840099 | 2.742701  | -1.291476 |  | 4.987731  | -0.406392 | -2.221471 |
| 25 | 1 | 0 |  | -2.827382 | 3.902301  | -2.634841 |  | 6.374309  | -1.824396 | -1.423865 |
| 26 | 6 | 0 |  | -3.394394 | 6.192164  | -1.22118  |  | 6.553294  | -2.293807 | -2.396417 |
| 27 | 1 | 0 |  | -3.220357 | 7.001381  | -0.508464 |  | 6.449961  | -2.607403 | -0.661425 |
| 28 | 1 | 0 |  | -4.466024 | 6.160124  | -1.441985 |  | 7.170427  | -1.097073 | -1.249656 |
| 29 | 1 | 0 |  | -2.874214 | 6.436845  | -2.154119 |  | 3.888519  | -2.170968 | -1.728286 |
| 30 | 8 | 0 |  | -1.468778 | 5.895603  | 0.954309  |  | 4.014316  | -2.54219  | -2.750427 |
| 31 | 1 | 0 |  | -1.024334 | 6.669076  | 0.56028   |  | 2.889016  | -1.733777 | -1.654485 |
| 32 | 8 | 0 |  | -0.111321 | 6.542412  | -1.170704 |  | 3.933897  | -3.043038 | -1.067445 |
| 33 | 6 | 0 |  | -2.060364 | 1.496705  | 3.576348  |  | 5.815217  | 0.710209  | -0.096627 |
| 34 | 1 | 0 |  | -2.852599 | 2.19908   | 3.845937  |  | 6.458108  | 0.362465  | 0.548351  |
| 35 | 1 | 0 |  | -1.364514 | 1.427238  | 4.419814  |  | 4.889906  | -1.109006 | 1.150609  |
| 36 | 1 | 0 |  | -2.505734 | 0.503894  | 3.453681  |  | 5.961183  | -1.138768 | 1.743135  |
| 37 | 8 | 0 |  | 0         | 0         | 2.415522  |  | -0.157242 | 2.582805  | -0.53144  |
| 38 | 1 | 0 |  | -1.113267 | -0.942125 | 0.200815  |  | -1.393298 | 2.060323  | -0.180377 |
| 39 | 6 | 0 |  | -0.322128 | -1.570298 | 0.591433  |  | -1.795602 | 0.79563   | -0.595265 |
| 40 | 6 | 0 |  | 1.663298  | -3.141785 | 1.682127  |  | -1.109208 | 0.179488  | -1.164983 |
| 41 | 6 | 0 |  | 0.349754  | -1.155879 | 1.737229  |  | -3.080703 | 0.322477  | -0.298202 |
| 42 | 6 | 0 |  | 0         | -2.778093 | -0.046006 |  | -2.25738  | 2.905719  | 0.535183  |
| 43 | 6 | 0 |  | 1.020941  | -3.571787 | 0.511466  |  | -3.974488 | 1.152574  | 0.397119  |
| 44 | 6 | 0 |  | 1.357778  | -1.940522 | 2.319106  |  | -3.538404 | 2.422525  | 0.802783  |
| 45 | 1 | 0 |  | 2.428983  | -3.775837 | 2.118666  |  | -4.229277 | 3.061908  | 1.347538  |
| 46 | 6 | 0 |  | -0.81943  | -3.228431 | -1.256702 |  | -5.629312 | -0.791421 | 0.664067  |
| 47 | 1 | 0 |  | -1.740731 | -3.685706 | -0.867282 |  | -5.080458 | -1.193913 | 1.523546  |
| 48 | 6 | 0 |  | -0.086745 | -4.324504 | -2.070271 |  | -3.462249 | -1.081196 | -0.773524 |
| 49 | 1 | 0 |  | 0.731938  | -3.857761 | -2.627945 |  | -2.599881 | -2.192006 | -0.051025 |
| 50 | 1 | 0 |  | -0.766227 | -4.796084 | -2.784133 |  | -1.583149 | -1.955045 | -0.389162 |
| 51 | 6 | 0 |  | 0.464492  | -5.369971 | -1.148036 |  | -2.590482 | -2.151112 | 1.483536  |
| 52 | 6 | 0 |  | 1.464015  | -4.912905 | -0.081649 |  | -1.777807 | -2.782527 | 1.857035  |
| 53 | 6 | 0 |  | -1.234006 | -2.088296 | -2.200636 |  | -3.517877 | -2.543197 | 1.913995  |
| 54 | 1 | 0 |  | -1.904399 | -1.37461  | -1.715875 |  | -2.431352 | -1.14107  | 1.871032  |
| 55 | 1 | 0 |  | -1.765762 | -2.495865 | -3.065905 |  | -2.936756 | -3.600795 | -0.559602 |
| 56 | 1 | 0 |  | -0.356985 | -1.54259  | -2.564569 |  | -2.903646 | -3.646611 | -1.650457 |
| 57 | 6 | 0 |  | 2.937016  | -4.841773 | -0.651712 |  | -3.930272 | -3.925448 | -0.231205 |
| 58 | 1 | 0 |  | 3.525896  | -4.648752 | 0.253923  |  | -2.210221 | -4.320404 | -0.169168 |
| 59 | 6 | 0 |  | 3.394394  | -6.192164 | -1.22118  |  | -3.183656 | -1.177316 | -2.170802 |
| 60 | 1 | 0 |  | 3.220357  | -7.001381 | -0.508464 |  | -3.958038 | -1.636934 | -2.544787 |
| 61 | 1 | 0 |  | 4.466024  | -6.160124 | -1.441985 |  | -4.969009 | -1.328497 | -0.584002 |
| 62 | 1 | 0 |  | 2.874214  | -6.436845 | -2.154119 |  | -5.58186  | -1.904913 | -1.473408 |
| 63 | 6 | 0 |  | 3.232465  | -3.702788 | -1.637301 |  | -1.810592 | 4.275795  | 0.976409  |
| 64 | 1 | 0 |  | 2.827382  | -3.902301 | -2.634841 |  | -0.897431 | 4.22161   | 1.578163  |
| 65 | 1 | 0 |  | 4.316032  | -3.597272 | -1.752744 |  | -2.586586 | 4.763933  | 1.570624  |
| 66 | 1 | 0 |  | 2.840099  | -2.742701 | -1.291476 |  | -1.584084 | 4.917125  | 0.117611  |
| 67 | 8 | 0 |  | 1.468778  | -5.895603 | 0.954309  |  | -5.407349 | 0.740687  | 0.666819  |
| 68 | 1 | 0 |  | 1.024334  | -6.669076 | 0.56028   |  | -5.741842 | 1.144448  | 1.628135  |
| 69 | 8 | 0 |  | 0.111321  | -6.542412 | -1.170704 |  | -6.0627   | 1.186274  | -0.094978 |
| 70 | 6 | 0 |  | 2.060364  | -1.496705 | 3.576348  |  | -7.104423 | -1.174877 | 0.770198  |
| 71 | 1 | 0 |  | 1.364514  | -1.427238 | 4.419814  |  | -7.228478 | -2.260803 | 0.789879  |
| 72 | 1 | 0 |  | 2.505734  | -0.503894 | 3.453681  |  | -7.535859 | -0.763353 | 1.687149  |
| 73 | 1 | 0 |  | 2.852599  | -2.19908  | 3.845937  |  | -7.671832 | -0.788155 | -0.081213 |

| Center Number | Atomic Number | Atomic Type | Conformer 2-3 | Coordinates (Angstroms) |           |           | Conformer 2-4 | Coordinates (Angstroms) |           |           |
|---------------|---------------|-------------|---------------|-------------------------|-----------|-----------|---------------|-------------------------|-----------|-----------|
|               |               |             |               | X                       | Y         | Z         |               | X                       | Y         | Z         |
| 1             | 1             | 0           |               | -3.685766               | -1.827725 | -1.436793 |               | -3.794942               | -1.740004 | -1.463418 |
| 2             | 6             | 0           |               | -3.360645               | -2.372582 | -0.542706 |               | -3.496072               | -2.287658 | -0.561894 |
| 3             | 6             | 0           |               | -4.757892               | -0.02362  | 0.12678   |               | -4.856808               | 0.093101  | 0.07362   |
| 4             | 6             | 0           |               | -3.386462               | 0.653652  | 0.114825  |               | -3.472481               | 0.743641  | 0.080756  |
| 5             | 6             | 0           |               | -2.356364               | 0.255006  | -0.750792 |               | -2.43586                | 0.319481  | -0.764624 |
| 6             | 6             | 0           |               | -3.160201               | 1.726675  | 0.990576  |               | -3.240193               | 1.817732  | 0.953723  |
| 7             | 6             | 0           |               | -3.966749               | 2.053658  | 1.640149  |               | -4.051248               | 2.164672  | 1.587135  |
| 8             | 1             | 0           |               | -1.943563               | 2.402623  | 1.058386  |               | -2.011687               | 2.469751  | 1.038674  |
| 9             | 6             | 0           |               | -0.918167               | 1.96535   | 0.200424  |               | -0.980391               | 2.006657  | 0.20156   |
| 10            | 1             | 0           |               | -1.122328               | 0.917646  | -0.692189 |               | -1.190114               | 0.958092  | -0.688667 |
| 11            | 6             | 0           |               | -0.319792               | 0.615319  | -1.356924 |               | -0.383042               | 0.636761  | -1.338748 |
| 12            | 1             | 0           |               | -1.719024               | 3.554918  | 2.003792  |               | -1.780267               | 3.623159  | 1.981018  |
| 13            | 1             | 0           |               | -2.60123                | 3.722935  | 2.626034  |               | -2.670893               | 3.815547  | 2.583901  |
| 14            | 6             | 0           |               | -1.5025                 | 4.481659  | 1.460797  |               | -1.531329               | 4.540872  | 1.436591  |
| 15            | 6             | 0           |               | -0.862934               | 3.369169  | 2.661084  |               | -0.942269               | 3.422454  | 2.657009  |
| 16            | 6             | 0           |               | -5.041237               | -0.742154 | 1.50646   |               | -5.176425               | -0.61235  | 1.452091  |
| 17            | 1             | 0           |               | -5.03718                | 0.097232  | 2.213159  |               | -5.166314               | 0.230252  | 2.1549    |
| 18            | 1             | 0           |               | -6.440221               | -1.373084 | 1.550985  |               | -6.588513               | -1.214475 | 1.477403  |
| 19            | 1             | 0           |               | -6.664173               | -1.709232 | 2.568377  |               | -6.834836               | -1.541958 | 2.49245   |
| 20            | 6             | 0           |               | -6.514701               | -2.245622 | 0.892585  |               | -6.670731               | -2.08785  | 0.821051  |
| 21            | 1             | 0           |               | -7.208654               | -0.654647 | 1.256841  |               | -7.337513               | -0.481713 | 1.168848  |
| 22            | 6             | 0           |               | -3.975644               | -1.741074 | 1.978925  |               | -4.138958               | -1.630494 | 1.945596  |
| 23            | 1             | 0           |               | -4.142748               | -1.976682 | 3.034943  |               | -4.32725                | -1.857936 | 2.999823  |
| 24            | 1             | 0           |               | -2.962258               | -1.341664 | 1.884022  |               | -3.116278               | -1.252215 | 1.864803  |
| 25            | 1             | 0           |               | -4.0258                 | -2.688623 | 1.432156  |               | -4.199961               | -2.579166 | 1.401906  |
| 26            | 6             | 0           |               | -5.761378               | 0.981072  | -0.036654 |               | -5.837827               | 1.116035  | -0.111366 |
| 27            | 1             | 0           |               | -6.398686               | 0.59168   | -0.663324 |               | -6.472842               | 0.735176  | -0.745548 |
| 28            | 1             | 0           |               | -4.892499               | -1.004402 | -1.050805 |               | -4.991447               | -0.891476 | -1.100818 |
| 29            | 1             | 0           |               | -5.952919               | -1.042452 | -1.661809 |               | -6.042807               | -0.912921 | -1.728075 |
| 30            | 8             | 0           |               | 0.261724                | 2.684735  | 0.25332   |               | 0.212316                | 2.703296  | 0.270616  |
| 31            | 1             | 0           |               | 1.475007                | 2.096738  | -0.076006 |               | 1.415212                | 2.085786  | -0.036498 |
| 32            | 8             | 0           |               | 1.881755                | 0.902776  | 0.509017  |               | 1.799002                | 0.886612  | 0.550812  |
| 33            | 6             | 0           |               | 1.215054                | 0.395007  | 1.197024  |               | 1.130385                | 0.381204  | 1.237826  |
| 34            | 1             | 0           |               | 3.145963                | 0.366343  | 0.231184  |               | 3.062385                | 0.348559  | 0.272208  |
| 35            | 1             | 0           |               | 2.313001                | 2.8078    | -0.950116 |               | 3.953572                | 1.027825  | -0.578169 |
| 36            | 1             | 0           |               | 4.014445                | 1.064421  | -0.623489 |               | 3.554902                | 2.256466  | -1.157349 |
| 37            | 8             | 0           |               | 3.574414                | 2.26554   | -1.198647 |               | 5.560714                | -0.993354 | -0.52626  |
| 38            | 1             | 0           |               | 4.246175                | 2.801542  | -1.865161 |               | 4.990759                | -1.553439 | -1.276667 |
| 39            | 6             | 0           |               | 5.632954                | -0.927712 | -0.662748 |               | 3.424637                | -0.970969 | 0.963776  |
| 40            | 6             | 0           |               | 5.038052                | -1.447806 | -1.422705 |               | 2.534031                | -2.166916 | 0.438249  |
| 41            | 6             | 0           |               | 3.536319                | -0.952448 | 0.902168  |               | 1.531226                | -1.870167 | 0.7704    |
| 42            | 6             | 0           |               | 2.629157                | -2.147863 | 0.405169  |               | 2.469776                | -2.356223 | -1.083788 |
| 43            | 6             | 0           |               | 1.632273                | -1.843877 | 0.748675  |               | 1.63455                 | -3.020187 | -1.329182 |
| 44            | 6             | 0           |               | 2.546126                | -2.3487   | -1.114553 |               | 3.373973                | -2.827662 | -1.482556 |
| 45            | 1             | 0           |               | 1.710069                | -3.016578 | -1.345964 |               | 2.311172                | -1.413097 | -1.613788 |
| 46            | 6             | 0           |               | 3.447849                | -2.819831 | -1.519507 |               | 2.880441                | -3.486798 | 1.14173   |
| 47            | 1             | 0           |               | 2.379058                | -1.409629 | -1.649296 |               | 2.891724                | -3.365553 | 2.227249  |
| 48            | 6             | 0           |               | 2.977719                | -3.464622 | 1.113378  |               | 3.857789                | -3.870423 | 0.82804   |
| 49            | 1             | 0           |               | 2.995336                | -3.338498 | 2.198233  |               | 2.134188                | -4.248197 | 0.893895  |
| 50            | 1             | 0           |               | 3.952247                | -3.851792 | 0.796033  |               | 3.154408                | -0.838236 | 2.359026  |
| 51            | 6             | 0           |               | 2.227894                | -4.225207 | 0.873844  |               | 3.943401                | -1.207199 | 2.798065  |
| 52            | 6             | 0           |               | 3.325974                | -0.822784 | 2.308676  |               | 4.923475                | -1.269354 | 0.811123  |
| 53            | 6             | 0           |               | 4.111993                | -1.23371  | 2.713746  |               | 5.544761                | -1.670322 | 1.78705   |
| 54            | 1             | 0           |               | 5.02933                 | -1.253308 | 0.683232  |               | 5.354776                | 0.508933  | -0.838505 |
| 55            | 1             | 0           |               | 5.679032                | -1.695656 | 1.621822  |               | 5.63612                 | 0.675835  | -1.882816 |
| 56            | 1             | 0           |               | 1.8622                  | 4.103872  | -1.573509 |               | 6.072448                | 1.089691  | -0.240586 |
| 57            | 6             | 0           |               | 0.920363                | 3.97759   | -2.117401 |               | 7.030419                | -1.407279 | -0.586947 |
| 58            | 1             | 0           |               | 2.614334                | 4.481316  | -2.270199 |               | 7.145462                | -2.478592 | -0.402316 |
| 59            | 6             | 0           |               | 1.685966                | 4.871841  | -0.812408 |               | 7.44499                 | -1.182799 | -1.573912 |
| 60            | 1             | 0           |               | 5.427943                | 0.589535  | -0.892189 |               | 7.619093                | -0.872143 | 0.163702  |
| 61            | 1             | 0           |               | 5.719592                | 0.834081  | -1.918936 |               | -2.63983                | -0.766669 | -1.801183 |
| 62            | 1             | 0           |               | 6.124409                | 1.135105  | -0.239794 |               | -2.850143               | -0.302889 | -2.775368 |
| 63            | 6             | 0           |               | 7.096916                | -1.349474 | -0.7776   |               | -1.718017               | -1.342968 | -1.93165  |
| 64            | 1             | 0           |               | 7.208573                | -2.427663 | -0.635951 |               | -4.084339               | -2.727043 | -2.59315  |
| 65            | 1             | 0           |               | 7.487045                | -1.090933 | -1.76616  |               | -4.885566               | -3.41768  | -2.317273 |
| 66            | 1             | 0           |               | 7.70937                 | -0.846951 | -0.023421 |               | -4.392323               | -2.202303 | -3.502113 |
| 67            | 8             | 0           |               | -2.556648               | -0.829538 | -1.789765 |               | -3.189178               | -3.313116 | -2.820273 |
| 68            | 1             | 0           |               | -2.793674               | -0.365113 | -2.757483 |               | 4.486027                | 3.033766  | -2.058689 |
| 69            | 8             | 0           |               | -1.625847               | -1.386326 | -1.939655 |               | 4.744115                | 2.467376  | -2.961303 |

|    |   |   |  |           |           |           |  |          |          |           |
|----|---|---|--|-----------|-----------|-----------|--|----------|----------|-----------|
| 70 | 6 | 0 |  | -3.974182 | -2.816065 | -2.565619 |  | 4.026362 | 3.972693 | -2.375369 |
| 71 | 1 | 0 |  | -4.75681  | -3.523588 | -2.279323 |  | 5.429181 | 3.274165 | -1.555164 |
| 72 | 1 | 0 |  | -4.30761  | -2.294219 | -3.467229 |  | 2.284445 | 2.767212 | -0.886806 |
| 73 | 1 | 0 |  | -3.071441 | -3.383329 | -2.809865 |  | 1.962692 | 3.707179 | -1.323886 |

| Center Number | Atomic Number | Atomic Type | Conformer 2-5 | Coordinates (Angstroms) |           |           |
|---------------|---------------|-------------|---------------|-------------------------|-----------|-----------|
|               |               |             |               | X                       | Y         | Z         |
| 1             | 1             | 0           |               | -3.664021               | -1.655893 | -1.529278 |
| 2             | 6             | 0           |               | -3.35661                | -2.215125 | -0.638756 |
| 3             | 6             | 0           |               | -4.783354               | 0.105425  | 0.052163  |
| 4             | 6             | 0           |               | -3.414187               | 0.812292  | 0.118417  |
| 5             | 6             | 0           |               | -2.369239               | 0.42253   | -0.747651 |
| 6             | 6             | 0           |               | -3.178401               | 1.872479  | 1.034112  |
| 7             | 6             | 0           |               | -0.891432               | 2.06596   | 0.226881  |
| 8             | 1             | 0           |               | -1.115106               | 1.042659  | -0.685717 |
| 9             | 6             | 0           |               | -0.327061               | 0.730353  | -1.362339 |
| 10            | 1             | 0           |               | -5.114285               | -0.71027  | 1.370736  |
| 11            | 6             | 0           |               | -5.244247               | 0.078166  | 2.11643   |
| 12            | 1             | 0           |               | -6.456293               | -1.451207 | 1.267361  |
| 13            | 1             | 0           |               | -6.743964               | -1.834578 | 2.251449  |
| 14            | 6             | 0           |               | -6.40272                | -2.306862 | 0.585147  |
| 15            | 6             | 0           |               | -7.25064                | -0.786051 | 0.920276  |
| 16            | 6             | 0           |               | -4.010889               | -1.64381  | 1.889201  |
| 17            | 1             | 0           |               | -4.243081               | -1.938541 | 2.917842  |
| 18            | 1             | 0           |               | -3.0295                 | -1.162075 | 1.89508   |
| 19            | 1             | 0           |               | -3.937045               | -2.568049 | 1.306899  |
| 20            | 6             | 0           |               | -5.815245               | 1.078909  | -0.118518 |
| 21            | 1             | 0           |               | -6.385238               | 0.708197  | -0.818931 |
| 22            | 6             | 0           |               | -4.870722               | -0.831917 | -1.169663 |
| 23            | 1             | 0           |               | -5.899393               | -0.827522 | -1.834357 |
| 24            | 1             | 0           |               | 0.291563                | 2.775411  | 0.30304   |
| 25            | 1             | 0           |               | 1.505101                | 2.163342  | 0.031781  |
| 26            | 6             | 0           |               | 1.846828                | 0.92069   | 0.550804  |
| 27            | 1             | 0           |               | 1.137785                | 0.371076  | 1.158417  |
| 28            | 1             | 0           |               | 3.12156                 | 0.391758  | 0.307148  |
| 29            | 1             | 0           |               | 4.066665                | 1.122025  | -0.435055 |
| 30            | 8             | 0           |               | 3.710149                | 2.39433   | -0.943844 |
| 31            | 1             | 0           |               | 5.65856                 | -0.91248  | -0.433442 |
| 32            | 8             | 0           |               | 5.136823                | -1.411693 | -1.258114 |
| 33            | 6             | 0           |               | 3.430702                | -0.982023 | 0.913503  |
| 34            | 1             | 0           |               | 2.569976                | -2.122255 | 0.235738  |
| 35            | 1             | 0           |               | 1.549324                | -1.840809 | 0.523963  |
| 36            | 1             | 0           |               | 2.605564                | -2.18892  | -1.297536 |
| 37            | 8             | 0           |               | 1.783692                | -2.820789 | -1.649613 |
| 38            | 1             | 0           |               | 3.530757                | -2.638337 | -1.673014 |
| 39            | 6             | 0           |               | 2.489209                | -1.204599 | -1.75914  |
| 40            | 6             | 0           |               | 2.860442                | -3.497733 | 0.852551  |
| 41            | 6             | 0           |               | 2.803288                | -3.46204  | 1.942769  |
| 42            | 6             | 0           |               | 3.852706                | -3.868103 | 0.57142   |
| 43            | 6             | 0           |               | 2.125662                | -4.227782 | 0.498692  |
| 44            | 6             | 0           |               | 3.069168                | -0.959692 | 2.293977  |
| 45            | 1             | 0           |               | 3.828013                | -1.365771 | 2.753012  |
| 46            | 6             | 0           |               | 4.934723                | -1.282094 | 0.83556   |
| 47            | 1             | 0           |               | 5.489507                | -1.76214  | 1.815924  |
| 48            | 6             | 0           |               | 5.478333                | 0.610104  | -0.648162 |
| 49            | 1             | 0           |               | 5.823232                | 0.849067  | -1.658919 |
| 50            | 1             | 0           |               | 6.161418                | 1.139902  | 0.03191   |
| 51            | 6             | 0           |               | 7.127733                | -1.33271  | -0.429528 |
| 52            | 6             | 0           |               | 7.227141                | -2.415699 | -0.318783 |
| 53            | 6             | 0           |               | 7.606605                | -1.038502 | -1.367866 |
| 54            | 1             | 0           |               | 7.667756                | -0.859851 | 0.395776  |
| 55            | 1             | 0           |               | -2.550435               | -0.628665 | -1.827456 |
| 56            | 1             | 0           |               | -2.784322               | -0.130225 | -2.778958 |
| 57            | 6             | 0           |               | -1.608439               | -1.162585 | -1.987362 |
| 58            | 1             | 0           |               | -3.912069               | -2.619237 | -2.688315 |
| 59            | 6             | 0           |               | -4.697888               | -3.337997 | -2.44104  |
| 60            | 1             | 0           |               | -4.222103               | -2.079133 | -3.587362 |
| 61            | 1             | 0           |               | -2.998597               | -3.17538  | -2.917767 |
| 62            | 1             | 0           |               | 4.698144                | 3.226498  | -1.728027 |
| 63            | 6             | 0           |               | 5.007768                | 2.725009  | -2.652564 |
| 64            | 1             | 0           |               | 4.263415                | 4.190381  | -2.002082 |

|    |   |   |  |           |          |           |
|----|---|---|--|-----------|----------|-----------|
| 65 | 1 | 0 |  | 5.610149  | 3.420493 | -1.15223  |
| 66 | 1 | 0 |  | 2.428929  | 2.896141 | -0.712684 |
| 67 | 8 | 0 |  | 2.139045  | 3.868568 | -1.098063 |
| 68 | 1 | 0 |  | -1.920417 | 2.479995 | 1.069057  |
| 69 | 8 | 0 |  | -1.72816  | 3.291782 | 1.763707  |
| 70 | 6 | 0 |  | -4.207052 | 2.401166 | 2.016051  |
| 71 | 1 | 0 |  | -5.219552 | 2.34779  | 1.62021   |
| 72 | 1 | 0 |  | -4.179507 | 1.838629 | 2.957084  |
| 73 | 1 | 0 |  | -3.982947 | 3.442366 | 2.264052  |

• For compound 3

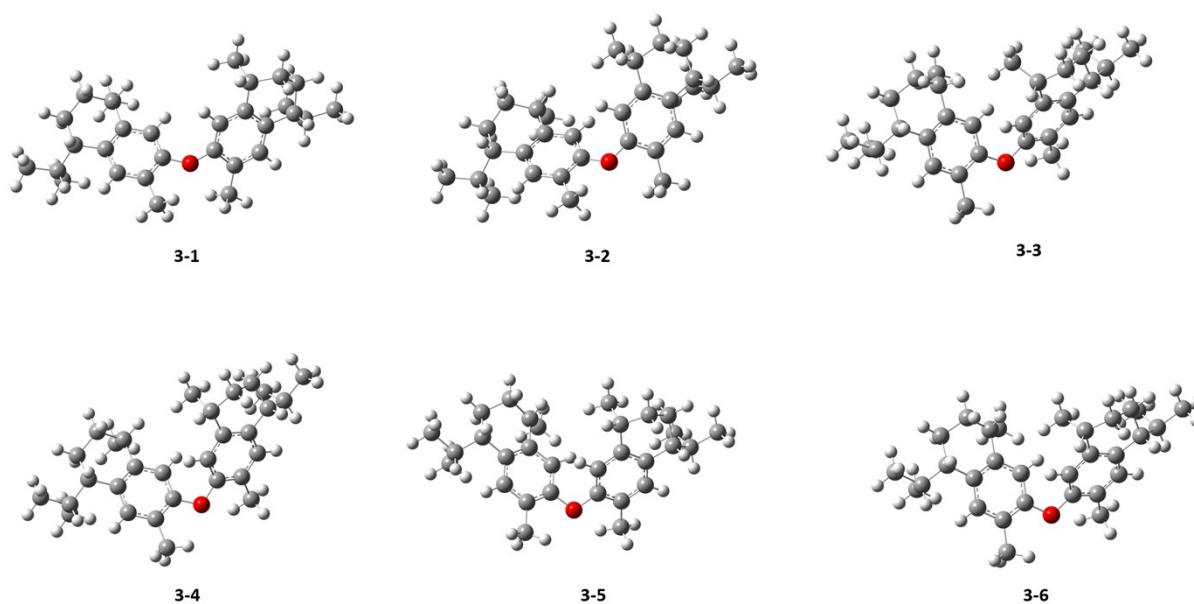

Table S5. Gibbs free energies and equilibrium populations of low-energy conformer of 3

| Conformer | G HF hartree | $\Delta G$ hartree | $\Delta G$ kJ/mol | $\Delta G$ kcal/mol | $(-\Delta G/RT)$ | $e(-\Delta G/RT)$ | Mole fraction | Population% |
|-----------|--------------|--------------------|-------------------|---------------------|------------------|-------------------|---------------|-------------|
| 3-1       | -1243.824904 | 0                  | 0                 | 0                   | 0                | 1                 | 0.230891909   | 23.0891909  |
| 3-2       | -1243.824831 | -7.3E-05           | 0.1916615         | 0.0458082           | -0.07731538      | 0.925597896       | 0.213713065   | 21.37130651 |
| 3-3       | -1243.824754 | -0.00015           | 0.393825          | 0.09412644          | -0.15886721      | 0.853109633       | 0.196976112   | 19.69761118 |
| 3-4       | -1243.824612 | -0.000292          | 0.7666461         | 0.18323281          | -0.30926151      | 0.733988799       | 0.169472075   | 16.94720751 |
| 3-5       | -1243.8245   | -0.000404          | 1.0607021         | 0.25351388          | -0.42788236      | 0.651888096       | 0.150515687   | 15.0515687  |
| 3-6       | -1243.823211 | -0.001693          | 4.4449718         | 1.06237377          | -1.79308129      | 0.166446508       | 0.038431152   | 3.843115203 |
| SUM       |              |                    |                   |                     |                  | 4.331030932       | 1             | 100         |

Table S6. Cartesian coordinates for the low-energy reoptimized of compound 3 in the gas phase (Å) at B3LYP/6-31G (d,p) level.

| Center Number | Atomic Number | Atomic Type | Conformer 3-1 | Coordinates (Angstroms) |           |          | Conformer 3-2 | Coordinates (Angstroms) |           |           |
|---------------|---------------|-------------|---------------|-------------------------|-----------|----------|---------------|-------------------------|-----------|-----------|
|               |               |             |               | X                       | Y         | Z        |               | X                       | Y         | Z         |
| 1             | 1             | 0           |               | -0.365152               | 0.357286  | 0.228129 |               | 0.576751                | -0.662114 | 0.102653  |
| 2             | 6             | 0           |               | -1.29746                | 0.196412  | 0.222763 |               | 1.442765                | -0.061245 | -0.151854 |
| 3             | 6             | 0           |               | -3.632831               | 1.652599  | 0.296321 |               | 3.604408                | 1.47448   | -0.89315  |
| 4             | 6             | 0           |               | -2.51245                | -0.483676 | 0.418304 |               | 2.722786                | -0.643062 | -0.136735 |
| 5             | 6             | 0           |               | -1.260854               | 1.575749  | 0.049037 |               | 1.257484                | 1.268537  | -0.514281 |
| 6             | 6             | 0           |               | -2.439747               | 2.34159   | 0.089985 |               | 2.345524                | 2.070879  | -0.902458 |
| 7             | 6             | 0           |               | -3.708133               | 0.25672   | 0.444923 |               | 3.830003                | 0.142248  | -0.505075 |
| 8             | 1             | 0           |               | -4.552005               | 2.230965  | 0.353124 |               | 4.454258                | 2.07293   | -1.212841 |
| 9             | 6             | 0           |               | -2.458913               | -1.989618 | 0.688673 |               | 2.831319                | -2.134503 | 0.19114   |
| 10            | 1             | 0           |               | -1.868229               | -2.104743 | 1.610086 |               | 2.243463                | -2.651952 | -0.582023 |

|    |   |   |  |           |           |           |  |          |           |           |
|----|---|---|--|-----------|-----------|-----------|--|----------|-----------|-----------|
| 11 | 6 | 0 |  | -3.84374  | -2.619235 | 0.951678  |  | 4.273118 | -2.680888 | 0.111902  |
| 12 | 1 | 0 |  | -3.714876 | -3.5068   | 1.581901  |  | 4.233728 | -3.750119 | -0.1263   |
| 13 | 1 | 0 |  | -4.264025 | -2.981764 | 0.005148  |  | 4.743268 | -2.610917 | 1.100874  |
| 14 | 6 | 0 |  | -4.82657  | -1.639283 | 1.595863  |  | 5.134053 | -1.933089 | -0.908255 |
| 15 | 1 | 0 |  | -4.420675 | -1.28763  | 2.553548  |  | 4.679312 | -2.016064 | -1.904199 |
| 16 | 1 | 0 |  | -5.770822 | -2.14062  | 1.827087  |  | 6.124272 | -2.391735 | -0.982789 |
| 17 | 6 | 0 |  | -5.055522 | -0.415756 | 0.684425  |  | 5.239702 | -0.437752 | -0.543606 |
| 18 | 1 | 0 |  | -5.694089 | 0.298175  | 1.224877  |  | 5.788787 | 0.072119  | -1.348642 |
| 19 | 6 | 0 |  | -1.725421 | -2.76911  | -0.418891 |  | 2.204151 | -2.492944 | 1.551507  |
| 20 | 1 | 0 |  | -0.695778 | -2.427812 | -0.557684 |  | 1.145714 | -2.223755 | 1.606786  |
| 21 | 1 | 0 |  | -2.247516 | -2.662985 | -1.37643  |  | 2.725978 | -1.976841 | 2.36518   |
| 22 | 1 | 0 |  | -1.690358 | -3.835673 | -0.170805 |  | 2.282043 | -3.57083  | 1.731642  |
| 23 | 6 | 0 |  | -5.812466 | -0.7596   | -0.641868 |  | 6.047736 | -0.17193  | 0.770365  |
| 24 | 1 | 0 |  | -5.155785 | -1.397599 | -1.248789 |  | 5.47402  | -0.589104 | 1.609066  |
| 25 | 6 | 0 |  | -7.115731 | -1.533603 | -0.380335 |  | 7.425005 | -0.856551 | 0.750918  |
| 26 | 1 | 0 |  | -7.771131 | -0.97809  | 0.302198  |  | 8.005887 | -0.543207 | -0.125665 |
| 27 | 1 | 0 |  | -6.939368 | -2.521044 | 0.054394  |  | 7.353408 | -1.94731  | 0.732586  |
| 28 | 1 | 0 |  | -7.664971 | -1.682416 | -1.316159 |  | 7.999598 | -0.582172 | 1.642053  |
| 29 | 6 | 0 |  | -6.124488 | 0.4934    | -1.475292 |  | 6.230531 | 1.32865   | 1.04751   |
| 30 | 1 | 0 |  | -6.775652 | 1.182011  | -0.922061 |  | 6.793285 | 1.812484  | 0.239134  |
| 31 | 1 | 0 |  | -6.646119 | 0.216403  | -2.397763 |  | 6.79275  | 1.478322  | 1.975563  |
| 32 | 1 | 0 |  | -5.220231 | 1.039399  | -1.754199 |  | 5.275356 | 1.84928   | 1.148362  |
| 33 | 8 | 0 |  | -0.091894 | 2.291791  | -0.145358 |  | 0.02037  | 1.889491  | -0.543848 |
| 34 | 1 | 0 |  | 1.542286  | 1.879006  | 1.829204  |  | -1.44854 | 0.513175  | -2.171305 |
| 35 | 6 | 0 |  | 1.917201  | 1.492301  | 0.885251  |  | -1.84736 | 0.520564  | -1.16135  |
| 36 | 6 | 0 |  | 2.840661  | 0.594962  | -1.545311 |  | -2.75186 | 0.548148  | 1.437476  |
| 37 | 6 | 0 |  | 1.124004  | 1.619172  | -0.246412 |  | -1.1231  | 1.181871  | -0.177828 |
| 38 | 6 | 0 |  | 3.187244  | 0.899899  | 0.823911  |  | -3.05263 | -0.13574  | -0.86713  |
| 39 | 6 | 0 |  | 3.657459  | 0.418763  | -0.413933 |  | -3.51832 | -0.111411 | 0.462866  |
| 40 | 6 | 0 |  | 1.574815  | 1.182494  | -1.500831 |  | -1.55595 | 1.211797  | 1.155362  |
| 41 | 1 | 0 |  | 3.205817  | 0.271162  | -2.515838 |  | -3.10219 | 0.538654  | 2.46664   |
| 42 | 6 | 0 |  | 4.019001  | 0.830795  | 2.097662  |  | -3.74846 | -0.91863  | -1.983061 |
| 43 | 1 | 0 |  | 3.865971  | 1.775441  | 2.636357  |  | -5.02411 | -1.654122 | -1.518748 |
| 44 | 6 | 0 |  | 5.512812  | 0.716045  | 1.754085  |  | -5.17849 | -2.531623 | -2.157009 |
| 45 | 1 | 0 |  | 6.094391  | 0.56473   | 2.671183  |  | -5.89605 | -1.008146 | -1.680576 |
| 46 | 1 | 0 |  | 5.854845  | 1.66298   | 1.31543   |  | -4.96742 | -2.063633 | -0.045535 |
| 47 | 6 | 0 |  | 5.771205  | -0.423706 | 0.766976  |  | -5.8585  | -2.635927 | 0.227536  |
| 48 | 1 | 0 |  | 6.846186  | -0.519752 | 0.585057  |  | -4.11019 | -2.729656 | 0.118909  |
| 49 | 1 | 0 |  | 5.453964  | -1.369388 | 1.220938  |  | 2.136901 | 3.503729  | -1.321144 |
| 50 | 6 | 0 |  | 5.047041  | -0.212086 | -0.57881  |  | 1.442611 | 3.577621  | -2.165625 |
| 51 | 1 | 0 |  | 5.644273  | 0.519146  | -1.146598 |  | 3.083735 | 3.964191  | -1.614305 |
| 52 | 6 | 0 |  | 5.032324  | -1.506783 | -1.452019 |  | 1.704098 | 4.099355  | -0.509266 |
| 53 | 1 | 0 |  | 4.59969   | -1.230923 | -2.421342 |  | -0.76376 | 1.924834  | 2.221753  |
| 54 | 6 | 0 |  | 4.159106  | -2.632063 | -0.875097 |  | -1.27502 | 1.871373  | 3.185958  |
| 55 | 1 | 0 |  | 4.560354  | -3.017249 | 0.068635  |  | -0.61791 | 2.980503  | 1.969032  |
| 56 | 1 | 0 |  | 4.113507  | -3.473429 | -1.57494  |  | 0.233478 | 1.487087  | 2.341071  |
| 57 | 1 | 0 |  | 3.135024  | -2.292976 | -0.692156 |  | -4.05527 | -0.049567 | -3.217019 |
| 58 | 6 | 0 |  | 6.454962  | -2.011296 | -1.7424   |  | -4.7451  | 0.761028  | -2.957102 |
| 59 | 1 | 0 |  | 7.087789  | -1.213658 | -2.147858 |  | -3.15459 | 0.399178  | -3.645235 |
| 60 | 1 | 0 |  | 6.429513  | -2.823575 | -2.476641 |  | -4.52672 | -0.6561   | -3.998002 |
| 61 | 1 | 0 |  | 6.94166   | -2.400424 | -0.841903 |  | -3.02664 | -1.686369 | -2.299648 |
| 62 | 6 | 0 |  | 3.538025  | -0.297124 | 3.034082  |  | -6.05323 | 0.118845  | 0.857143  |
| 63 | 1 | 0 |  | 2.483376  | -0.163968 | 3.294726  |  | -6.13972 | 0.559351  | -0.145272 |
| 64 | 1 | 0 |  | 4.11823   | -0.298658 | 3.963507  |  | -5.90847 | 1.280655  | 1.852821  |
| 65 | 1 | 0 |  | 3.639099  | -1.282483 | 2.568694  |  | -5.0383  | 1.90498   | 1.636751  |
| 66 | 6 | 0 |  | -2.392895 | 3.839783  | -0.068493 |  | -6.79583 | 1.921773  | 1.819224  |
| 67 | 1 | 0 |  | -1.758973 | 4.304422  | 0.695068  |  | -5.80885 | 0.908702  | 2.880352  |
| 68 | 1 | 0 |  | -3.394613 | 4.269725  | 0.010022  |  | -7.35477 | -0.645358 | 1.153263  |
| 69 | 1 | 0 |  | -1.972508 | 4.126924  | -1.039031 |  | -8.19608 | 0.051661  | 1.229049  |
| 70 | 6 | 0 |  | 0.733667  | 1.360792  | -2.739477 |  | -7.6033  | -1.372414 | 0.375616  |
| 71 | 1 | 0 |  | 1.283054  | 1.048151  | -3.630755 |  | -7.28482 | -1.183499 | 2.10685   |
| 72 | 1 | 0 |  | 0.433381  | 2.40591   | -2.868538 |  | -4.80503 | -0.825911 | 0.86122   |
| 73 | 1 | 0 |  | -0.188205 | 0.770827  | -2.68559  |  | -4.68636 | -1.173251 | 1.897594  |

| Center Number | Atomic Number | Atomic Type | Conformer 3-3 | Coordinates (Angstroms) |           |           | Conformer 3-4 | Coordinates (Angstroms) |          |        |
|---------------|---------------|-------------|---------------|-------------------------|-----------|-----------|---------------|-------------------------|----------|--------|
|               |               |             |               | X                       | Y         | Z         |               | X                       | Y        | Z      |
| 1             | 1             | 0           |               | 3.748671                | -2.651454 | -0.329076 |               | 3.932854                | 2.687009 | 0.146  |
| 2             | 6             | 0           |               | 3.467284                | -2.813917 | 0.722505  |               | 3.563725                | -2.80002 | 0.885  |
| 3             | 6             | 0           |               | 4.969642                | -0.519003 | 0.425568  |               | 5.031318                | -0.48166 | 0.588  |
| 4             | 6             | 0           |               | 3.609449                | 0.174656  | 0.277644  |               | 3.673422                | 0.163948 | 0.284  |
| 5             | 6             | 0           |               | 2.52459                 | -0.435747 | -0.379449 |               | 2.664981                | -0.51396 | -0.428 |



|    |   |   |  |           |           |           |  |           |          |        |
|----|---|---|--|-----------|-----------|-----------|--|-----------|----------|--------|
| 6  | 6 | 0 |  | 3.396522  | 1.433913  | 0.863638  |  | 3.380993  | 1.446951 | 0.776  |
| 7  | 6 | 0 |  | 4.208852  | 1.910346  | 1.405608  |  | 4.131908  | 1.975718 | 1.356  |
| 8  | 1 | 0 |  | 2.180947  | 2.117458  | 0.803124  |  | 2.158371  | 2.090647 | 0.573  |
| 9  | 6 | 0 |  | 1.126875  | 1.490248  | 0.120723  |  | 1.184177  | 1.395594 | -0.159 |
| 10 | 1 | 0 |  | 1.296647  | 0.235645  | -0.456453 |  | 1.433176  | 0.11678  | -0.647 |
| 11 | 6 | 0 |  | 0.461505  | -0.234866 | -0.966197 |  | 0.655055  | -0.40314 | -1.198 |
| 12 | 1 | 0 |  | 1.994369  | 3.472524  | 1.43821   |  | 1.885195  | 3.473072 | 1.11   |
| 13 | 1 | 0 |  | 1.792042  | 4.244387  | 0.686819  |  | 1.736024  | 4.196733 | 0.301  |
| 14 | 6 | 0 |  | 2.888777  | 3.767147  | 1.992896  |  | 2.718734  | 3.8215   | 1.725  |
| 15 | 1 | 0 |  | 1.143877  | 3.477137  | 2.128163  |  | 0.975674  | 3.49282  | 1.72   |
| 16 | 1 | 0 |  | 6.17412   | 0.426499  | 0.117894  |  | 6.235897  | 0.47924  | 0.333  |
| 17 | 6 | 0 |  | 6.078907  | 1.286957  | 0.791594  |  | 6.061774  | 1.371888 | 0.947  |
| 18 | 1 | 0 |  | 7.519622  | -0.237185 | 0.452205  |  | 7.561604  | -0.12755 | 0.82   |
| 19 | 6 | 0 |  | 8.334487  | 0.490683  | 0.375636  |  | 8.362854  | 0.617772 | 0.774  |
| 20 | 1 | 0 |  | 7.750746  | -1.059014 | -0.233726 |  | 7.871515  | -0.97824 | 0.204  |
| 21 | 1 | 0 |  | 7.52538   | -0.63955  | 1.471644  |  | 7.486633  | -0.47414 | 1.857  |
| 22 | 1 | 0 |  | 6.176688  | 0.977885  | -1.316505 |  | 6.35228   | 0.951731 | -1.124 |
| 23 | 6 | 0 |  | 6.980089  | 1.712188  | -1.43964  |  | 7.1474    | 1.699156 | -1.219 |
| 24 | 1 | 0 |  | 5.230912  | 1.471883  | -1.558596 |  | 5.421042  | 1.406859 | -1.475 |
| 25 | 6 | 0 |  | 6.343422  | 0.187936  | -2.056858 |  | 6.600113  | 0.127373 | -1.802 |
| 26 | 1 | 0 |  | -2.266545 | 2.087846  | -0.842233 |  | -2.237287 | 1.877047 | -1.183 |
| 27 | 1 | 0 |  | -3.536763 | 1.514804  | -0.764657 |  | -3.500058 | 1.302313 | -1.031 |
| 28 | 1 | 0 |  | -4.301665 | 1.911832  | -1.426057 |  | -4.289519 | 1.650302 | -1.692 |
| 29 | 6 | 0 |  | -3.867642 | 0.468406  | 0.114209  |  | -3.793022 | 0.312932 | -0.077 |
| 30 | 1 | 0 |  | -1.285139 | 1.585522  | 0.025789  |  | -1.225272 | 1.438034 | -0.315 |
| 31 | 1 | 0 |  | -2.866719 | 0.007665  | 0.992215  |  | -2.76319  | -0.08286 | 0.797  |
| 32 | 1 | 0 |  | -1.58669  | 0.577569  | 0.934866  |  | -1.490151 | 0.489218 | 0.668  |
| 33 | 8 | 0 |  | -0.817032 | 0.232883  | 1.619334  |  | -0.699162 | 0.192009 | 1.35   |
| 34 | 1 | 0 |  | -3.128066 | -1.071913 | 2.03472   |  | -5.217854 | -0.24312 | 0.033  |
| 35 | 6 | 0 |  | -2.605452 | -0.770921 | 2.952527  |  | -5.806665 | -0.67873 | -1.348 |
| 36 | 6 | 0 |  | -2.53255  | -2.430658 | 1.610627  |  | -5.757885 | 0.20163  | -2.001 |
| 37 | 6 | 0 |  | -2.988256 | -2.803574 | 0.688093  |  | -5.005722 | -1.79278 | -2.04  |
| 38 | 6 | 0 |  | -2.688401 | -3.18048  | 2.394261  |  | -5.402829 | -1.97777 | -3.044 |
| 39 | 6 | 0 |  | -5.303495 | -0.073956 | 0.141628  |  | -5.061561 | -2.73886 | -1.49  |
| 40 | 6 | 0 |  | -5.890039 | -0.336502 | -1.281395 |  | -3.949897 | -1.52419 | -2.141 |
| 41 | 1 | 0 |  | -5.831112 | 0.612062  | -1.829006 |  | -7.292289 | -1.05741 | -1.24  |
| 42 | 6 | 0 |  | -5.099901 | -1.373932 | -2.094322 |  | -7.871473 | -0.26899 | -0.745 |
| 43 | 1 | 0 |  | -5.500113 | -1.444401 | -3.111532 |  | -7.436446 | -1.98373 | -0.673 |
| 44 | 6 | 0 |  | -5.163627 | -2.373753 | -1.651178 |  | -7.721183 | -1.21316 | -2.235 |
| 45 | 1 | 0 |  | -4.041922 | -1.105187 | -2.168284 |  | -1.960692 | 2.935839 | -2.221 |
| 46 | 1 | 0 |  | -7.380705 | -0.707102 | -1.221833 |  | -1.140375 | 2.64063  | -2.884 |
| 47 | 6 | 0 |  | -7.951726 | 0.022826  | -0.636773 |  | -1.66363  | 3.884245 | -1.759 |
| 48 | 1 | 0 |  | -7.538557 | -1.693499 | -0.773099 |  | -2.847153 | 3.119705 | -2.833 |
| 49 | 1 | 0 |  | -7.808006 | -0.735025 | -2.22993  |  | 0.002689  | 2.070407 | -0.431 |
| 50 | 6 | 0 |  | -1.952535 | 3.208478  | -1.801291 |  | 5.039071  | -0.67978 | 1.672  |
| 51 | 1 | 0 |  | -1.11188  | 2.951134  | -2.454577 |  | 5.214117  | -1.84553 | -0.111 |
| 52 | 6 | 0 |  | -1.667866 | 4.124049  | -1.270701 |  | 6.010119  | -2.40294 | 0.395  |
| 53 | 1 | 0 |  | -2.817603 | 3.435419  | -2.429355 |  | 5.548959  | -1.69856 | -1.147 |
| 54 | 6 | 0 |  | -0.049159 | 2.214693  | 0.00112   |  | -5.849037 | 0.595783 | 0.364  |
| 55 | 1 | 0 |  | 5.066666  | -0.779235 | 1.491726  |  | -4.476058 | -1.13979 | 2.343  |
| 56 | 1 | 0 |  | 5.051816  | -1.844189 | -0.361121 |  | -4.604423 | -2.01466 | 2.994  |
| 57 | 1 | 0 |  | 5.872645  | -2.448495 | 0.039946  |  | -5.34846  | -1.35729 | 1.096  |
| 58 | 6 | 0 |  | 5.299071  | -1.645626 | -1.412949 |  | -6.399356 | -1.44994 | 1.39   |
| 59 | 1 | 0 |  | -5.923161 | 0.72992   | 0.570702  |  | -5.064797 | -2.32116 | 0.655  |
| 60 | 1 | 0 |  | -4.629774 | -1.159674 | 2.35027   |  | 4.182074  | -4.08353 | -0.724 |
| 61 | 1 | 0 |  | -4.93754  | -0.254913 | 2.891456  |  | 4.917337  | -4.63355 | -0.127 |
| 62 | 6 | 0 |  | -4.819725 | -2.007373 | 3.019354  |  | 3.259705  | -4.67425 | -0.749 |
| 63 | 1 | 0 |  | -5.460668 | -1.293596 | 1.072862  |  | 4.565382  | -4.0201  | -1.75  |
| 64 | 1 | 0 |  | -6.517534 | -1.416665 | 1.329542  |  | -4.879062 | 0.101403 | 3.153  |
| 65 | 1 | 0 |  | -5.166199 | -2.209426 | 0.547723  |  | -5.933788 | 0.051824 | 3.445  |
| 66 | 6 | 0 |  | -1.455745 | -2.346049 | 1.433673  |  | -4.281466 | 0.178665 | 4.068  |
| 67 | 1 | 0 |  | 3.906511  | -4.018514 | -1.001715 |  | -4.732776 | 1.025884 | 2.585  |
| 68 | 1 | 0 |  | 4.674472  | -4.619099 | -0.502339 |  | -3.005614 | -1.09904 | 1.897  |
| 69 | 1 | 0 |  | 2.968727  | -4.584536 | -0.977882 |  | -2.71829  | -2.09865 | 1.54   |
| 70 | 6 | 0 |  | 4.201289  | -3.906251 | -2.052249 |  | -2.348563 | -0.88123 | 2.747  |
| 71 | 1 | 0 |  | 2.645544  | -1.817352 | -0.991292 |  | 2.872986  | -1.9224  | -0.948 |
| 72 | 1 | 0 |  | 1.679703  | -2.332419 | -0.924179 |  | 1.917704  | -2.46077 | -0.937 |
| 73 | 1 | 0 |  | 2.868846  | -1.732111 | -2.066161 |  | 3.189069  | -1.88857 | -2.002 |

| Center Number | Atomic Number | Atomic Type | Conformer 3-5 | Coordinates (Angstroms) |           |           | Conformer 3-6 | Coordinates (Angstroms) |           |           |
|---------------|---------------|-------------|---------------|-------------------------|-----------|-----------|---------------|-------------------------|-----------|-----------|
|               |               |             |               | X                       | Y         | Z         |               | X                       | Y         | Z         |
| 1             | 1             | 0           |               | 3.688034                | 2.587342  | -0.31455  |               | -4.150324               | 1.549481  | 1.960956  |
| 2             | 6             | 0           |               | 3.203018                | -2.596759 | 0.955694  |               | -4.091319               | 0.724645  | 2.686227  |
| 3             | 6             | 0           |               | 5.016334                | -0.399005 | 0.480191  |               | -5.162467               | 0.021237  | 0.104442  |
| 4             | 6             | 0           |               | 3.637134                | 0.255958  | 0.360916  |               | -3.747884               | -0.563856 | 0.063452  |
| 5             | 6             | 0           |               | 2.609369                | -0.356131 | -0.388428 |               | -2.638509               | 0.19404   | 0.492775  |
| 6             | 6             | 0           |               | 3.356431                | 1.482322  | 1.014342  |               | -3.52141                | -1.889162 | -0.388741 |
| 7             | 6             | 0           |               | 1.118761                | 1.488589  | 0.068119  |               | -1.126609               | -1.597299 | -0.093743 |
| 8             | 1             | 0           |               | 1.364436                | 0.262582  | -0.543186 |               | -1.3382                 | -0.317584 | 0.41073   |
| 9             | 6             | 0           |               | 0.587113                | -0.22361  | -1.123848 |               | -0.501113               | 0.278331  | 0.758961  |
| 10            | 1             | 0           |               | 6.113883                | 0.416     | -0.285312 |               | -5.7311                 | 0.270955  | -1.333902 |
| 11            | 6             | 0           |               | 6.070876                | 1.439732  | 0.101338  |               | -5.660874               | -0.682117 | -1.868865 |
| 12            | 1             | 0           |               | 7.524056                | -0.112919 | 0.020444  |               | -7.220887               | 0.646352  | -1.293906 |
| 13            | 1             | 0           |               | 8.283773                | 0.535478  | -0.429358 |               | -7.630125               | 0.705409  | -2.308304 |
| 14            | 6             | 0           |               | 7.677174                | -1.121315 | -0.378763 |               | -7.383773               | 1.619655  | -0.818607 |
| 15            | 1             | 0           |               | 7.710989                | -0.148395 | 1.099773  |               | -7.804696               | -0.098075 | -0.740548 |
| 16            | 1             | 0           |               | 5.873026                | 0.508777  | -1.799953 |               | -4.924238               | 1.292447  | -2.150194 |
| 17            | 6             | 0           |               | 6.61211                 | 1.173975  | -2.259465 |               | -5.306287               | 1.342684  | -3.175598 |
| 18            | 1             | 0           |               | 4.878945                | 0.907958  | -2.023822 |               | -3.865877               | 1.018594  | -2.200335 |
| 19            | 6             | 0           |               | 5.964111                | -0.464764 | -2.293917 |               | -4.991047               | 2.302498  | -1.731316 |
| 20            | 1             | 0           |               | -2.277024               | 2.076977  | -0.942729 |               | 2.579217                | 0.192987  | -1.478073 |
| 21            | 1             | 0           |               | -3.539647               | 1.484483  | -0.886371 |               | 2.67749                 | 0.872472  | -2.318864 |
| 22            | 1             | 0           |               | -4.313763               | 1.897269  | -1.527792 |               | 3.638897                | 0.053133  | -0.565644 |
| 23            | 6             | 0           |               | -3.85052                | 0.398104  | -0.051198 |               | 1.262241                | -1.412568 | -0.274293 |
| 24            | 1             | 0           |               | -1.285878               | 1.551896  | -0.098924 |               | 3.503548                | -0.885504 | 0.477156  |
| 25            | 6             | 0           |               | -2.84197                | -0.083982 | 0.804481  |               | 2.297324                | -1.609473 | 0.646317  |
| 26            | 1             | 0           |               | -1.5702                 | 0.504091  | 0.771358  |               | 4.912019                | 0.885021  | -0.771422 |
| 27            | 1             | 0           |               | -0.795446               | 0.14133   | 1.439995  |               | 4.608429                | 2.399068  | -1.015342 |
| 28            | 1             | 0           |               | -5.273286               | -0.173678 | -0.041727 |               | 3.940275                | 2.450745  | -1.883578 |
| 29            | 6             | 0           |               | -5.818755               | -0.464013 | -1.476922 |               | 3.878221                | 3.081293  | 0.152196  |
| 30            | 1             | 0           |               | -5.759658               | 0.480847  | -2.031348 |               | 3.601937                | 4.105557  | -0.120481 |
| 31            | 1             | 0           |               | -4.988161               | -1.493587 | -2.258912 |               | 4.506369                | 3.143066  | 1.047423  |
| 32            | 1             | 0           |               | -5.354448               | -1.573544 | -3.288125 |               | 2.961597                | 2.547315  | 0.420291  |
| 33            | 8             | 0           |               | -5.051137               | -2.492794 | -1.814484 |               | 5.876525                | 3.178638  | -1.398376 |
| 34            | 1             | 0           |               | -3.932341               | -1.209312 | -2.299959 |               | 6.407679                | 2.697143  | -2.227337 |
| 35            | 6             | 0           |               | -7.303371               | -0.860956 | -1.452971 |               | 6.573186                | 3.262893  | -0.557687 |
| 36            | 6             | 0           |               | -7.903294               | -0.133509 | -0.894327 |               | 5.619199                | 4.195929  | -1.712296 |
| 37            | 6             | 0           |               | -7.455388               | -1.843581 | -0.993969 |               | 0.118001                | -2.197162 | -0.164803 |
| 38            | 6             | 0           |               | -7.702503               | -0.911267 | -2.471732 |               | -5.808052               | -0.753347 | 0.539321  |
| 39            | 6             | 0           |               | -1.97963                | 3.240375  | -1.855009 |               | -5.314154               | 1.286936  | 0.999043  |
| 40            | 6             | 0           |               | -1.1392                 | 3.019993  | -2.522038 |               | -6.252818               | 1.218826  | 1.560192  |
| 41            | 1             | 0           |               | -1.702135               | 4.136033  | -1.28774  |               | -5.408826               | 2.178105  | 0.366016  |
| 42            | 6             | 0           |               | -2.850085               | 3.484014  | -2.469255 |               | 5.365421                | 0.526747  | -1.708298 |
| 43            | 1             | 0           |               | -0.058455               | 2.197367  | -0.111248 |               | 6.02483                 | -0.76659  | 0.854678  |
| 44            | 6             | 0           |               | 5.298835                | -0.338646 | 1.539471  |               | 6.751075                | -0.79694  | 1.677627  |
| 45            | 1             | 0           |               | 5.055779                | -1.906351 | 0.089513  |               | 5.953381                | 0.679283  | 0.34725   |
| 46            | 1             | 0           |               | 5.677845                | -2.447404 | 0.811186  |               | 6.937601                | 0.99764   | -0.012663 |
| 47            | 6             | 0           |               | 5.554166                | -2.023301 | -0.880837 |               | 5.711643                | 1.323657  | 1.201504  |
| 48            | 1             | 0           |               | -5.920499               | 0.622292  | 0.357566  |               | -4.343205               | 2.858096  | 2.73341   |
| 49            | 1             | 0           |               | -4.589397               | -1.304658 | 2.181173  |               | -5.275394               | 2.844719  | 3.308778  |
| 50            | 6             | 0           |               | -4.729408               | -2.243416 | 2.733281  |               | -3.518783               | 3.031301  | 3.433706  |
| 51            | 1             | 0           |               | -5.4246                 | -1.3945   | 0.89362   |               | -4.386375               | 3.714557  | 2.049561  |
| 52            | 6             | 0           |               | -6.482567               | -1.523123 | 1.146523  |               | 6.503403                | -1.758893 | -0.216602 |
| 53            | 1             | 0           |               | -5.12071                | -2.305174 | 0.362854  |               | 7.473567                | -1.45522  | -0.625229 |
| 54            | 6             | 0           |               | 3.82129                 | -4.034028 | -0.516954 |               | 6.618478                | -2.762211 | 0.207906  |
| 55            | 1             | 0           |               | 4.447351                | -4.623458 | 0.161861  |               | 5.798074                | -1.833648 | -1.05053  |
| 56            | 1             | 0           |               | 2.843146                | -4.523    | -0.581444 |               | 4.653785                | -1.149316 | 1.433876  |
| 57            | 1             | 0           |               | 4.280881                | -4.073061 | -1.512065 |               | 4.490257                | -0.589849 | 2.367079  |
| 58            | 6             | 0           |               | -5.024356               | -0.156962 | 3.104867  |               | 4.659938                | -2.206171 | 1.721024  |
| 59            | 1             | 0           |               | -6.086523               | -0.241582 | 3.359865  |               | -2.851577               | 1.544848  | 1.142816  |
| 60            | 1             | 0           |               | -4.453505               | -0.173399 | 4.039794  |               | -1.989685               | 1.785655  | 1.775494  |
| 61            | 1             | 0           |               | -4.868939               | 0.822598  | 2.641446  |               | -2.910246               | 2.340634  | 0.384684  |
| 62            | 6             | 0           |               | -3.10744                | -1.211091 | 1.783946  |               | -4.639626               | -2.832578 | -0.78414  |
| 63            | 1             | 0           |               | -2.803427               | -2.166616 | 1.332623  |               | -5.532388               | -2.702968 | -0.166005 |
| 64            | 1             | 0           |               | -2.475766               | -1.081027 | 2.670866  |               | -4.948497               | -2.693055 | -1.826363 |
| 65            | 1             | 0           |               | 2.818964                | -1.738205 | -0.969734 |               | -4.311655               | -3.87074  | -0.683778 |
| 66            | 6             | 0           |               | 1.846688                | -2.214033 | -1.140497 |               | -2.2149                 | -2.382226 | -0.469098 |
| 67            | 1             | 0           |               | 3.312749                | -1.68136  | -1.95166  |               | -2.03218                | -3.395044 | -0.815865 |
| 68            | 1             | 0           |               | 4.347078                | 2.187456  | 1.918592  |               | 2.121147                | -2.583661 | 1.788423  |

|    |   |   |  |          |          |          |  |          |           |           |
|----|---|---|--|----------|----------|----------|--|----------|-----------|-----------|
| 69 | 1 | 0 |  | 4.958123 | 1.487393 | 2.495049 |  | 2.405692 | -2.133786 | 2.744955  |
| 70 | 6 | 0 |  | 5.036579 | 2.826373 | 1.355125 |  | 1.084628 | -2.913508 | 1.858271  |
| 71 | 1 | 0 |  | 3.819941 | 2.83218  | 2.626956 |  | 2.745222 | -3.476433 | 1.658007  |
| 72 | 1 | 0 |  | 2.101159 | 2.081698 | 0.855175 |  | 1.40236  | -0.529928 | -1.346237 |
| 73 | 1 | 0 |  | 1.874974 | 3.019625 | 1.353459 |  | 0.595254 | -0.419435 | -2.062912 |

- **NMR calculation of compound 1**

Table S7. Cartesian coordinates for the low-energy reoptimized of **1a** and **1b** in the gas phase (Å) at B3LYP/6-31G (d,p) level

| Center Number | Atomic Number | Atomic Type | Conformer 1 | Coordinates (Angstroms) |           |           |
|---------------|---------------|-------------|-------------|-------------------------|-----------|-----------|
|               |               |             |             | X                       | Y         | Z         |
| 1             | 1             | 0           |             | 2.242966                | -0.450353 | -2.868292 |
| 2             | 6             | 0           |             | 3.182111                | -0.756876 | -2.383076 |
| 3             | 6             | 0           |             | 4.289569                | 0.232113  | -2.803588 |
| 4             | 1             | 0           |             | 4.701695                | -0.074149 | -3.772165 |
| 5             | 1             | 0           |             | 3.864845                | 1.230111  | -2.956174 |
| 6             | 6             | 0           |             | 5.392072                | 0.311942  | -1.7469   |
| 7             | 1             | 0           |             | 5.833694                | -0.681858 | -1.596818 |
| 8             | 1             | 0           |             | 6.202567                | 0.968862  | -2.084558 |
| 9             | 6             | 0           |             | 4.820877                | 0.824018  | -0.410644 |
| 10            | 1             | 0           |             | 5.606006                | 0.694008  | 0.346857  |
| 11            | 6             | 0           |             | 3.65758                 | -0.072414 | 0.017083  |
| 12            | 6             | 0           |             | 2.924773                | -0.769679 | -0.87515  |
| 13            | 6             | 0           |             | 1.80876                 | -1.707536 | -0.460915 |
| 14            | 1             | 0           |             | 2.1576                  | -2.741461 | -0.546836 |
| 15            | 1             | 0           |             | 0.973549                | -1.613625 | -1.165663 |
| 16            | 6             | 0           |             | 1.299415                | -1.52533  | 0.991353  |
| 17            | 1             | 0           |             | 0.80864                 | -2.457179 | 1.284342  |
| 18            | 6             | 0           |             | 2.512713                | -1.380758 | 1.940236  |
| 19            | 6             | 0           |             | 3.462838                | -0.222308 | 1.524094  |
| 20            | 1             | 0           |             | 4.444783                | -0.482245 | 1.947325  |
| 21            | 6             | 0           |             | 3.504298                | -2.176089 | -2.908851 |
| 22            | 1             | 0           |             | 2.709947                | -2.894001 | -2.689685 |
| 23            | 1             | 0           |             | 4.43191                 | -2.557914 | -2.468052 |
| 24            | 1             | 0           |             | 3.633289                | -2.1503   | -3.995702 |
| 25            | 6             | 0           |             | 4.540632                | 2.379488  | -0.482298 |
| 26            | 1             | 0           |             | 5.076947                | 2.732734  | -1.374619 |
| 27            | 6             | 0           |             | 3.070575                | 2.786627  | -0.66678  |
| 28            | 1             | 0           |             | 2.479157                | 2.542978  | 0.218016  |
| 29            | 1             | 0           |             | 2.603699                | 2.291475  | -1.522716 |
| 30            | 1             | 0           |             | 3.002219                | 3.868446  | -0.830706 |
| 31            | 6             | 0           |             | 5.152206                | 3.119352  | 0.718402  |
| 32            | 1             | 0           |             | 6.227598                | 2.921802  | 0.798326  |
| 33            | 1             | 0           |             | 4.673304                | 2.797236  | 1.646789  |
| 34            | 1             | 0           |             | 5.020826                | 4.203329  | 0.61841   |
| 35            | 8             | 0           |             | 3.121022                | 1.009312  | 2.162876  |
| 36            | 1             | 0           |             | 2.190585                | 1.169422  | 1.908882  |
| 37            | 6             | 0           |             | -3.009226               | -2.224844 | -0.072261 |
| 38            | 1             | 0           |             | -3.395391               | -3.065184 | 0.520608  |
| 39            | 6             | 0           |             | -1.603298               | -1.93598  | 0.365453  |
| 40            | 1             | 0           |             | -0.944696               | -2.798546 | 0.366228  |
| 41            | 6             | 0           |             | -1.158513               | -0.706259 | 0.67213   |
| 42            | 6             | 0           |             | -2.083439               | 0.481035  | 0.643604  |
| 43            | 1             | 0           |             | -2.012065               | 1.012715  | 1.602798  |
| 44            | 1             | 0           |             | -1.686722               | 1.201973  | -0.083481 |
| 45            | 6             | 0           |             | -3.537471               | 0.1821    | 0.352829  |
| 46            | 6             | 0           |             | -3.967557               | -1.059626 | 0.048325  |
| 47            | 6             | 0           |             | -5.44237                | -1.407835 | -0.116705 |
| 48            | 1             | 0           |             | -5.587061               | -2.395395 | 0.345735  |
| 49            | 6             | 0           |             | -6.307885               | -0.395924 | 0.651821  |
| 50            | 1             | 0           |             | -6.146449               | -0.529895 | 1.72957   |
| 51            | 1             | 0           |             | -7.370305               | -0.591649 | 0.462883  |
| 52            | 6             | 0           |             | -5.954028               | 1.03821   | 0.258244  |
| 53            | 1             | 0           |             | -6.596713               | 1.743856  | 0.79441   |
| 54            | 1             | 0           |             | -6.168498               | 1.180308  | -0.806847 |
| 55            | 6             | 0           |             | -4.477469               | 1.372814  | 0.549497  |

|    |   |   |  |           |           |           |
|----|---|---|--|-----------|-----------|-----------|
| 56 | 1 | 0 |  | -4.404384 | 1.620291  | 1.622336  |
| 57 | 6 | 0 |  | -3.99985  | 2.658248  | -0.200072 |
| 58 | 1 | 0 |  | -2.994625 | 2.888462  | 0.17344   |
| 59 | 6 | 0 |  | -3.889673 | 2.474459  | -1.721935 |
| 60 | 1 | 0 |  | -3.255038 | 1.62176   | -1.984308 |
| 61 | 1 | 0 |  | -3.4571   | 3.368528  | -2.183434 |
| 62 | 1 | 0 |  | -4.869713 | 2.31262   | -2.18364  |
| 63 | 6 | 0 |  | -4.876108 | 3.873237  | 0.142987  |
| 64 | 1 | 0 |  | -5.887374 | 3.775374  | -0.265458 |
| 65 | 1 | 0 |  | -4.441385 | 4.787408  | -0.275198 |
| 66 | 1 | 0 |  | -4.963275 | 4.009942  | 1.226784  |
| 67 | 6 | 0 |  | -5.879567 | -1.547054 | -1.591292 |
| 68 | 1 | 0 |  | -6.932721 | -1.845042 | -1.648782 |
| 69 | 1 | 0 |  | -5.276058 | -2.300278 | -2.101123 |
| 70 | 1 | 0 |  | -5.765691 | -0.60371  | -2.134912 |
| 71 | 8 | 0 |  | -2.956995 | -2.771356 | -1.414583 |
| 72 | 1 | 0 |  | -2.689163 | -2.043615 | -1.995684 |
| 73 | 6 | 0 |  | 0.255918  | -0.415639 | 1.049808  |
| 74 | 8 | 0 |  | 0.537923  | 0.746003  | 1.363377  |
| 75 | 8 | 0 |  | 3.211557  | -2.627604 | 1.742982  |
| 76 | 1 | 0 |  | 3.958221  | -2.638454 | 2.358401  |
| 77 | 6 | 0 |  | 2.094898  | -1.278136 | 3.410521  |
| 78 | 1 | 0 |  | 1.520809  | -2.168198 | 3.685481  |
| 79 | 1 | 0 |  | 1.493362  | -0.391179 | 3.612046  |
| 80 | 1 | 0 |  | 2.98148   | -1.228399 | 4.052463  |

- **NMR Calculation of compound 2**

Table S8. Cartesian coordinates for the low-energy reoptimized of **2** in the gas phase (Å) at B3LYP/6-31G (d,p) level.

| Center Number | Atomic Number | Atomic Type | Conformer 2a | Coordinates (Angstroms) |          |           |
|---------------|---------------|-------------|--------------|-------------------------|----------|-----------|
|               |               |             |              | X                       | Y        | Z         |
| 1             | 1             | 0           |              | 1.113267                | 0.942125 | 0.200815  |
| 2             | 6             | 0           |              | 0.322128                | 1.570298 | 0.591433  |
| 3             | 6             | 0           |              | -1.663298               | 3.141785 | 1.682127  |
| 4             | 6             | 0           |              | 3.25612                 | 2.778093 | -0.046006 |
| 5             | 6             | 0           |              | -0.349754               | 1.155879 | 1.737229  |
| 6             | 6             | 0           |              | -1.357778               | 1.940522 | 2.319106  |
| 7             | 6             | 0           |              | -1.020941               | 3.571787 | 0.511466  |
| 8             | 1             | 0           |              | -2.428983               | 3.775837 | 2.118666  |
| 9             | 6             | 0           |              | 0.81943                 | 3.228431 | -1.256702 |
| 10            | 1             | 0           |              | 1.740731                | 3.685706 | -0.867282 |
| 11            | 6             | 0           |              | 0.086745                | 4.324504 | -2.070271 |
| 12            | 1             | 0           |              | -0.731938               | 3.857761 | -2.627945 |
| 13            | 1             | 0           |              | 0.766227                | 4.796084 | -2.784133 |
| 14            | 6             | 0           |              | -0.464492               | 5.369971 | -1.148036 |
| 15            | 6             | 0           |              | -1.464015               | 4.912905 | -0.081649 |
| 16            | 6             | 0           |              | 1.234006                | 2.088296 | -2.200636 |
| 17            | 1             | 0           |              | 0.356985                | 1.54259  | -2.564569 |
| 18            | 1             | 0           |              | 1.904399                | 1.37461  | -1.715875 |
| 19            | 1             | 0           |              | 1.765762                | 2.495865 | -3.065905 |
| 20            | 6             | 0           |              | -2.937016               | 4.841773 | -0.651712 |
| 21            | 1             | 0           |              | -3.525896               | 4.648752 | 0.253923  |
| 22            | 6             | 0           |              | -3.232465               | 3.702788 | -1.637301 |
| 23            | 1             | 0           |              | -4.316032               | 3.597272 | -1.752744 |
| 24            | 1             | 0           |              | -2.840099               | 2.742701 | -1.291476 |
| 25            | 1             | 0           |              | -2.827382               | 3.902301 | -2.634841 |
| 26            | 6             | 0           |              | -3.394394               | 6.192164 | -1.22118  |
| 27            | 1             | 0           |              | -3.220357               | 7.001381 | -0.508464 |
| 28            | 1             | 0           |              | -4.466024               | 6.160124 | -1.441985 |
| 29            | 1             | 0           |              | -2.874214               | 6.436845 | -2.154119 |
| 30            | 8             | 0           |              | -1.468778               | 5.895603 | 0.954309  |
| 31            | 1             | 0           |              | -1.024334               | 6.669076 | 0.56028   |
| 32            | 8             | 0           |              | -0.111321               | 6.542412 | -1.170704 |
| 33            | 6             | 0           |              | -2.060364               | 1.496705 | 3.576348  |
| 34            | 1             | 0           |              | -2.852599               | 2.19908  | 3.845937  |
| 35            | 1             | 0           |              | -1.364514               | 1.427238 | 4.419814  |

|    |   |   |  |           |           |           |
|----|---|---|--|-----------|-----------|-----------|
| 36 | 1 | 0 |  | -2.505734 | 0.503894  | 3.453681  |
| 37 | 8 | 0 |  | 0         | 0         | 2.415522  |
| 38 | 1 | 0 |  | -1.113267 | -0.942125 | 0.200815  |
| 39 | 6 | 0 |  | -0.322128 | -1.570298 | 0.591433  |
| 40 | 6 | 0 |  | 1.663298  | -3.141785 | 1.682127  |
| 41 | 6 | 0 |  | 0.349754  | -1.155879 | 1.737229  |
| 42 | 6 | 0 |  | 0         | -2.778093 | -0.046006 |
| 43 | 6 | 0 |  | 1.020941  | -3.571787 | 0.511466  |
| 44 | 6 | 0 |  | 1.357778  | -1.940522 | 2.319106  |
| 45 | 1 | 0 |  | 2.428983  | -3.775837 | 2.118666  |
| 46 | 6 | 0 |  | -0.81943  | -3.228431 | -1.256702 |
| 47 | 1 | 0 |  | -1.740731 | -3.685706 | -0.867282 |
| 48 | 6 | 0 |  | -0.086745 | -4.324504 | -2.070271 |
| 49 | 1 | 0 |  | 0.731938  | -3.857761 | -2.627945 |
| 50 | 1 | 0 |  | -0.766227 | -4.796084 | -2.784133 |
| 51 | 6 | 0 |  | 0.464492  | -5.369971 | -1.148036 |
| 52 | 6 | 0 |  | 1.464015  | -4.912905 | -0.081649 |
| 53 | 6 | 0 |  | -1.234006 | -2.088296 | -2.200636 |
| 54 | 1 | 0 |  | -1.904399 | -1.37461  | -1.715875 |
| 55 | 1 | 0 |  | -1.765762 | -2.495865 | -3.065905 |
| 56 | 1 | 0 |  | -0.356985 | -1.54259  | -2.564569 |
| 57 | 6 | 0 |  | 2.937016  | -4.841773 | -0.651712 |
| 58 | 1 | 0 |  | 3.525896  | -4.648752 | 0.253923  |
| 59 | 6 | 0 |  | 3.394394  | -6.192164 | -1.22118  |
| 60 | 1 | 0 |  | 3.220357  | -7.001381 | -0.508464 |
| 61 | 1 | 0 |  | 4.466024  | -6.160124 | -1.441985 |
| 62 | 1 | 0 |  | 2.874214  | -6.436845 | -2.154119 |
| 63 | 6 | 0 |  | 3.232465  | -3.702788 | -1.637301 |
| 64 | 1 | 0 |  | 2.827382  | -3.902301 | -2.634841 |
| 65 | 1 | 0 |  | 4.316032  | -3.597272 | -1.752744 |
| 66 | 1 | 0 |  | 2.840099  | -2.742701 | -1.291476 |
| 67 | 8 | 0 |  | 1.468778  | -5.895603 | 0.954309  |
| 68 | 1 | 0 |  | 1.024334  | -6.669076 | 0.56028   |
| 69 | 8 | 0 |  | 0.111321  | -6.542412 | -1.170704 |
| 70 | 6 | 0 |  | 2.060364  | -1.496705 | 3.576348  |
| 71 | 1 | 0 |  | 1.364514  | -1.427238 | 4.419814  |
| 72 | 1 | 0 |  | 2.505734  | -0.503894 | 3.453681  |
| 73 | 1 | 0 |  | 2.852599  | -2.19908  | 3.845937  |

- **NMR Calculation of compound 3**

Table S9. Cartesian coordinates for the low-energy reoptimized of **3** in the gas phase (Å) at B3LYP/6-31G (d,p) level.

| Center Number | Atomic Number | Atomic Type | Conformer 3 | Coordinates (Angstroms) |           |           |
|---------------|---------------|-------------|-------------|-------------------------|-----------|-----------|
|               |               |             |             | X                       | Y         | Z         |
| 1             | 1             | 0           |             | -0.365152               | 0.357286  | 0.228129  |
| 2             | 6             | 0           |             | -1.29746                | 0.196412  | 0.222763  |
| 3             | 6             | 0           |             | -3.632831               | 1.652599  | 0.296321  |
| 4             | 6             | 0           |             | -2.51245                | -0.483676 | 0.418304  |
| 5             | 6             | 0           |             | -1.260854               | 1.575749  | 0.049037  |
| 6             | 6             | 0           |             | -2.439747               | 2.34159   | 0.089985  |
| 7             | 6             | 0           |             | -3.708133               | 0.25672   | 0.444923  |
| 8             | 1             | 0           |             | -4.552005               | 2.230965  | 0.353124  |
| 9             | 6             | 0           |             | -2.458913               | -1.989618 | 0.688673  |
| 10            | 1             | 0           |             | -1.868229               | -2.104743 | 1.610086  |
| 11            | 6             | 0           |             | -3.84374                | -2.619235 | 0.951678  |
| 12            | 1             | 0           |             | -3.714876               | -3.5068   | 1.581901  |
| 13            | 1             | 0           |             | -4.264025               | -2.981764 | 0.005148  |
| 14            | 6             | 0           |             | -4.82657                | -1.639283 | 1.595863  |
| 15            | 1             | 0           |             | -4.420675               | -1.28763  | 2.553548  |
| 16            | 1             | 0           |             | -5.770822               | -2.14062  | 1.827087  |
| 17            | 6             | 0           |             | -5.055522               | -0.415756 | 0.684425  |
| 18            | 1             | 0           |             | -5.694089               | 0.298175  | 1.224877  |
| 19            | 6             | 0           |             | -1.725421               | -2.76911  | -0.418891 |
| 20            | 1             | 0           |             | -0.695778               | -2.427812 | -0.557684 |
| 21            | 1             | 0           |             | -2.247516               | -2.662985 | -1.37643  |
| 22            | 1             | 0           |             | -1.690358               | -3.835673 | -0.170805 |
| 23            | 6             | 0           |             | -5.812466               | -0.7596   | -0.641868 |

|    |   |   |  |           |           |           |
|----|---|---|--|-----------|-----------|-----------|
| 24 | 1 | 0 |  | -5.155785 | -1.397599 | -1.248789 |
| 25 | 6 | 0 |  | -7.115731 | -1.533603 | -0.380335 |
| 26 | 1 | 0 |  | -7.771131 | -0.97809  | 0.302198  |
| 27 | 1 | 0 |  | -6.939368 | -2.521044 | 0.054394  |
| 28 | 1 | 0 |  | -7.664971 | -1.682416 | -1.316159 |
| 29 | 6 | 0 |  | -6.124488 | 0.4934    | -1.475292 |
| 30 | 1 | 0 |  | -6.775652 | 1.182011  | -0.922061 |
| 31 | 1 | 0 |  | -6.646119 | 0.216403  | -2.397763 |
| 32 | 1 | 0 |  | -5.220231 | 1.039399  | -1.754199 |
| 33 | 8 | 0 |  | -0.091894 | 2.291791  | -0.145358 |
| 34 | 1 | 0 |  | 1.542286  | 1.879006  | 1.829204  |
| 35 | 6 | 0 |  | 1.917201  | 1.492301  | 0.885251  |
| 36 | 6 | 0 |  | 2.840661  | 0.594962  | -1.545311 |
| 37 | 6 | 0 |  | 1.124004  | 1.619172  | -0.246412 |
| 38 | 6 | 0 |  | 3.187244  | 0.899899  | 0.823911  |
| 39 | 6 | 0 |  | 3.657459  | 0.418763  | -0.413933 |
| 40 | 6 | 0 |  | 1.574815  | 1.182494  | -1.500831 |
| 41 | 1 | 0 |  | 3.205817  | 0.271162  | -2.515838 |
| 42 | 6 | 0 |  | 4.019001  | 0.830795  | 2.097662  |
| 43 | 1 | 0 |  | 3.865971  | 1.775441  | 2.636357  |
| 44 | 6 | 0 |  | 5.512812  | 0.716045  | 1.754085  |
| 45 | 1 | 0 |  | 6.094391  | 0.56473   | 2.671183  |
| 46 | 1 | 0 |  | 5.854845  | 1.66298   | 1.31543   |
| 47 | 6 | 0 |  | 5.771205  | -0.423706 | 0.766976  |
| 48 | 1 | 0 |  | 6.846186  | -0.519752 | 0.585057  |
| 49 | 1 | 0 |  | 5.453964  | -1.369388 | 1.220938  |
| 50 | 6 | 0 |  | 5.047041  | -0.212086 | -0.57881  |
| 51 | 1 | 0 |  | 5.644273  | 0.519146  | -1.146598 |
| 52 | 6 | 0 |  | 5.032324  | -1.506783 | -1.452019 |
| 53 | 1 | 0 |  | 4.59969   | -1.230923 | -2.421342 |
| 54 | 6 | 0 |  | 4.159106  | -2.632063 | -0.875097 |
| 55 | 1 | 0 |  | 4.560354  | -3.017249 | 0.068635  |
| 56 | 1 | 0 |  | 4.113507  | -3.473429 | -1.57494  |
| 57 | 1 | 0 |  | 3.135024  | -2.292976 | -0.692156 |
| 58 | 6 | 0 |  | 6.454962  | -2.011296 | -1.7424   |
| 59 | 1 | 0 |  | 7.087789  | -1.213658 | -2.147858 |
| 60 | 1 | 0 |  | 6.429513  | -2.823575 | -2.476641 |
| 61 | 1 | 0 |  | 6.94166   | -2.400424 | -0.841903 |
| 62 | 6 | 0 |  | 3.538025  | -0.297124 | 3.034082  |
| 63 | 1 | 0 |  | 2.483376  | -0.163968 | 3.294726  |
| 64 | 1 | 0 |  | 4.11823   | -0.298658 | 3.963507  |
| 65 | 1 | 0 |  | 3.639099  | -1.282483 | 2.568694  |
| 66 | 6 | 0 |  | -2.392895 | 3.839783  | -0.068493 |
| 67 | 1 | 0 |  | -1.758973 | 4.304422  | 0.695068  |
| 68 | 1 | 0 |  | -3.394613 | 4.269725  | 0.010022  |
| 69 | 1 | 0 |  | -1.972508 | 4.126924  | -1.039031 |
| 70 | 6 | 0 |  | 0.733667  | 1.360792  | -2.739477 |
| 71 | 1 | 0 |  | 1.283054  | 1.048151  | -3.630755 |
| 72 | 1 | 0 |  | 0.433381  | 2.40591   | -2.868538 |
| 73 | 1 | 0 |  | -0.188205 | 0.770827  | -2.68559  |
